# Supplementary material
Source: PubMed Central journal article supplement (PMC5110324)
Supplement: NIHMS827421-supplement-SI.pdf [file NIHMS827421-supplement-SI.pdf]

# Catalytic Ring-Opening of Cyclic Alcohols Enabled by PCET Activation of Strong O-H Bonds

Hatice G. Yayla, Huaiju Wang, Kyle T. Tarantino, Hudson S. Orbe, and Robert R. Knowles\*

*Department of Chemistry, Princeton University, Princeton, New Jersey 08544, United States*

Correspondence to: rknowles@princeton.edu

## Supporting Information

| <b>Table of Contents</b>                                                                                           | <b>Page</b> |
|--------------------------------------------------------------------------------------------------------------------|-------------|
| General Information                                                                                                | S2          |
| Synthesis of Starting Materials                                                                                    | S3          |
| Synthesis of Products                                                                                              | S14         |
| <sup>1</sup> H and <sup>13</sup> C NMR Spectra of Products                                                         | S28         |
| Stern-Volmer Studies                                                                                               | S63         |
| Experimental Details for Investigating Long-range PCET (Figure 3)                                                  | S66         |
| Experimental Details for Investigating the Relationship<br>Between Effective BDFE and Reaction Outcomes (Figure 4) | S68         |
| Cyclic Voltammograms of Starting Materials                                                                         | S69         |
| Structure and Potential Data of Photocatalysts                                                                     | S76         |
| DFT Computations                                                                                                   | S78         |
| References                                                                                                         | S91         |

## General Information

Commercial reagents were purified prior to use following the guidelines of Perrin and Armarego.<sup>1</sup> All solvents were purified according to the method of Grubbs.<sup>2</sup> Organic solutions were concentrated under reduced pressure on a Büchi rotary evaporator using a water bath. Chromatographic purification of products was accomplished by flash chromatography on a Biotage Isolera One with cartridges containing Fluka 230–400 mesh silica gel or Acros Brockmann I 70–290 mesh neutral alumina. Thin-layer chromatography (TLC) was performed on Silicycle 250  $\mu\text{m}$  silica gel plates or Sorbent Technologies 250  $\mu\text{m}$  neutral alumina plates. Visualization of the developed chromatogram was performed by irradiation with UV light or treatment with a solution of potassium permanganate, ceric ammonium molybdate, or 2,4-dinitrophenylhydrazine stain followed by heating. Yields refer to purified compounds unless otherwise noted.

All  $^1\text{H}$  and  $^{13}\text{C}$  NMR spectra were recorded on Bruker Avance II 500 (500 and 126 MHz for  $^1\text{H}$  and  $^{13}\text{C}$  respectively), Bruker Avance III 300 (75 MHz for  $^{13}\text{C}$ ), or Bruker Avance III HD 800 (800 MHz for  $^1\text{H}$ ) instruments, and are internally referenced to residual protio-solvent signals:  $\text{CDCl}_3$  at  $\delta$  7.26 and 77.16 ppm and  $\text{C}_6\text{D}_6$  at  $\delta$  7.16 and 128.06 ppm. Data for  $^1\text{H}$  NMR are reported as follows: chemical shift ( $\delta$  ppm), broad peak (b), multiplicity (s = singlet, d = doublet, t = triplet, q = quartet, p = pentet, h = hextet, m = multiplet), coupling constant (Hz) and integration; data for  $^{13}\text{C}$  NMR are reported in terms of chemical shift and no special nomenclature is used for equivalent carbons. IR spectra were recorded on a Perkin Elmer Spectrum 100 FT-IR spectrometer and are reported in terms of frequency of absorption ( $\text{cm}^{-1}$ ). High-resolution mass spectra were obtained at Princeton University Mass Spectrometry Facility using an Agilent 6210 TOF LC/MS (Electrospray Ionization) or an Agilent 7200 Q-TOF GC/MS (Electron Ionization); low-resolution ones were obtained on an Agilent 6120 LC/MS (Electrospray Ionization) or an Agilent 5975C GC/MSD (Electron Ionization). Cyclic voltammograms were acquired on a CH Instruments 600E potentiostat. Stern-Volmer experiments and measurement of the emission spectrum of photocatalyst were conducted on an Agilent Cary Eclipse Fluorescence Spectrophotometer.

## Synthesis of Starting Materials

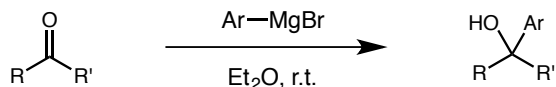

### Procedure A (Grignard solution):

A flame-dried 250 mL round bottom flask was charged with a stir bar and degassed. Commercial 4-methoxyphenylmagnesium bromide solution (2.0 equiv, 0.5 M THF solution) was syringed into the flask. The relevant ketone (1.0 equiv) was added dropwise into the solution. The reaction was stirred at room temperature and consumption of starting material was monitored by TLC. Upon completion, the reaction mixture was quenched by slow addition of ice water. The aqueous layer was extracted with ethyl acetate. The combined organic layers were washed with brine, dried over anhydrous sodium sulfate, concentrated and purified by neutral alumina flash column chromatography (hexanes/EtOAc) to obtain the pure alcohol.

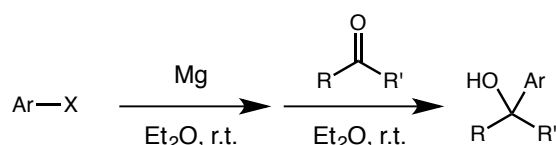

### Procedure B (Grignard):

A flame-dried 250 mL round bottom flask was charged with a stir bar, catalytical amount of iodine, 1-iodo-4-methoxybenzene (1.5 equiv), and magnesium (1.75 equiv). The flask was then evacuated and carefully refilled with argon. Et<sub>2</sub>O was added to make a 0.5 M solution of the aryl iodide, and the mixture was stirred at room temperature under Ar for 45 minutes to allow complete formation of the aryl Grignard reagent. The solution was cooled to 0 °C in an ice bath, and the ketone (1.0 equiv, 1.0 M Et<sub>2</sub>O or THF solution) was added in dropwise. The reaction was allowed to warm to room temperature and consumption of ketone was monitored by TLC. Upon completion, dropwise addition of H<sub>2</sub>O quenched the reaction. The aqueous layer was extracted three times with EtOAc. The combined organic layers were washed with brine, dried over anhydrous Na<sub>2</sub>SO<sub>4</sub>, concentrated, and purified by neutral alumina flash column chromatography (hexanes/EtOAc) to afford the pure alcohol.

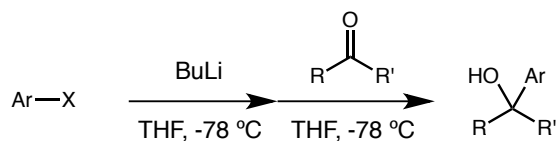

### Procedure C (Lithiation):

Aryl bromide or the parental arene (1.0 equiv) was added into a flame-dried 100 mL round bottom flask containing a stir bar, and dissolved in anhydrous THF. The solution was purged with argon and cooled to -78 °C. Then *n*-BuLi (1.1 equiv) or *t*-BuLi (2.0 equiv) was added slowly into the solution. The reaction mixture was stirred at -78 °C and lithiation monitored by GC. When the aryl bromide was fully consumed, the ketone (1.0 equiv) was added dropwise via syringe. The reaction was allowed to warm up to room temperature and the consumption of ketone was monitored by TLC. Upon completion, the reaction mixture was quenched by slow addition of 30 mL saturated ammonium chloride. Organics were extracted three times with EtOAc. The combined organic layers were washed with brine, dried over anhydrous Na<sub>2</sub>SO<sub>4</sub>, concentrated, and purified by neutral alumina flash column chromatography (hexanes/EtOAc) to obtain the pure alcohol.

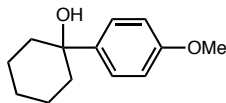

### 1-(4-methoxyphenyl)cyclohexan-1-ol

The titled compound was prepared according to a literature procedure.<sup>3</sup> Spectra are consistent with reported literature values.  $E_{p/2}$  (vs.  $\text{Fc}/\text{Fc}^+$ ) = 1.22 V.

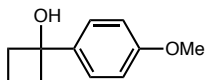

### 1-(4-methoxyphenyl)cyclobutan-1-ol

Prepared following the general procedure A with cyclobutanone to afford the titled compound as a colorless oil (2.1 g, 88%).  $^1\text{H NMR}$  (500 MHz,  $\text{C}_6\text{D}_6$ )  $\delta$  7.32 (d,  $J$  = 8.7 Hz, 2H), 6.81 (d,  $J$  = 8.7 Hz, 2H), 3.33 (s, 3H), 2.37 (dddd,  $J$  = 11.6, 9.2, 5.3, 2.7 Hz, 2H), 2.25 – 2.14 (m, 2H), 1.83 (tdd,  $J$  = 9.4, 5.9, 4.5 Hz, 1H), 1.51 (dddd,  $J$  = 16.4, 11.1, 8.8, 7.6 Hz, 1H).  $^{13}\text{C NMR}$  (126 MHz,  $\text{C}_6\text{D}_6$ )  $\delta$  158.9, 139.0, 126.2, 113.6, 76.2, 54.5, 37.2, 13.0. **IR (neat):** 3392, 2984, 2940, 2836, 1611, 1512, 1299, 1177, 1030, 828  $\text{cm}^{-1}$ . **HRMS (EI):** exact mass calculated for  $[\text{M}\cdot]^+$  ( $\text{C}_{11}\text{H}_{14}\text{O}_2$ ) requires  $m/z$  178.0988, found  $m/z$  178.0992.

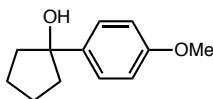

### 1-(4-methoxyphenyl)cyclopentan-1-ol

Prepared following the general procedure A with cyclopentanone to afford the titled compound as a colorless oil (2.8 g, 64%).  $^1\text{H NMR}$  (500 MHz,  $\text{C}_6\text{D}_6$ )  $\delta$  7.32 (d,  $J$  = 8.8 Hz, 2H), 6.82 (d,  $J$  = 8.8 Hz, 2H), 3.35 (d,  $J$  = 2.1 Hz, 3H), 1.99 – 1.84 (m, 2H), 1.79 (ddd,  $J$  = 11.5, 5.4, 2.4 Hz, 4H), 1.62 (ddd,  $J$  = 10.6, 5.2, 1.9 Hz, 2H).  $^{13}\text{C NMR}$  (126 MHz,  $\text{C}_6\text{D}_6$ )  $\delta$  158.6, 139.6, 126.3, 113.4, 82.5, 54.5, 41.7, 23.8. **IR (neat):** 3405, 2955, 2872, 2836, 1611, 1581, 1511, 1463, 1442, 1365, 1297, 1240, 1177, 1114, 1093, 1033, 1000, 961, 904, 883, 795, 732  $\text{cm}^{-1}$ . **HRMS (ESI):** exact mass calculated for  $[\text{M}-\text{H}_2\text{O}+\text{H}]^+$  ( $\text{C}_{12}\text{H}_{15}\text{O}$ ) requires  $m/z$  175.11175, found  $m/z$  175.11164.

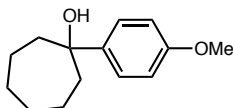

### 1-(4-methoxyphenyl)cycloheptan-1-ol

Prepared following the general procedure A with cycloheptan-1-one to afford the titled compound as a colorless oil (1.38 g, 74%).  $^1\text{H NMR}$  (500 MHz,  $\text{C}_6\text{D}_6$ )  $\delta$  7.37 (d,  $J$  = 8.8 Hz, 1H), 6.84 (d,  $J$  = 8.8 Hz, 1H), 3.36 (s, 1H), 1.88 (ddd,  $J$  = 14.4, 10.6, 1.8 Hz, 1H), 1.82 – 1.68 (m, 2H), 1.63 – 1.54 (m, 1H), 1.52 – 1.36 (m, 2H).  $^{13}\text{C NMR}$  (126 MHz,  $\text{C}_6\text{D}_6$ )  $\delta$  158.4, 143.5, 125.7, 113.4, 75.8, 54.5, 43.3, 28.9, 22.4. **IR (neat):** 3421, 2922, 2856, 1609, 1510, 1460, 1245, 1178, 1033, 799  $\text{cm}^{-1}$ . **HRMS (EI):** exact mass calculated for  $[\text{M}\cdot]^+$  ( $\text{C}_{14}\text{H}_{20}\text{O}_2$ ) requires  $m/z$  220.1458, found  $m/z$  220.1459.

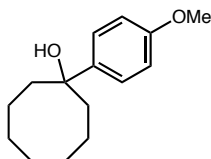

### 1-(4-methoxyphenyl)cyclooctan-1-ol

Prepared following the general procedure A with cyclooctan-1-one to afford the titled compound as a colorless oil (2.97 g, 76%).  $^1\text{H NMR}$  (500 MHz,  $\text{C}_6\text{D}_6$ )  $\delta$  7.39 (d,  $J = 8.9$  Hz, 2H), 6.84 (d,  $J = 8.9$  Hz, 2H), 3.36 (s, 2H), 1.92 (ddd,  $J = 14.9, 8.5, 1.8$  Hz, 2H), 1.83 (ddd,  $J = 14.8, 9.8, 2.2$  Hz, 2H), 1.76 – 1.64 (m, 2H), 1.63 – 1.50 (m, 3H), 1.48 – 1.35 (m, 5H).  $^{13}\text{C NMR}$  (126 MHz,  $\text{C}_6\text{D}_6$ )  $\delta$  158.5, 141.8, 126.3, 113.3, 75.6, 54.5, 37.9, 28.4, 24.4, 21.9. **IR (neat):** 3414, 2919, 2851, 1609, 1510, 1301, 1243, 1178, 1038, 830, 804  $\text{cm}^{-1}$ . **HRMS (EI):** exact mass calculated for  $[\text{M}\cdot]^+$  ( $\text{C}_{15}\text{H}_{22}\text{O}_2$ ) requires  $m/z$  234.1614, found  $m/z$  234.1612.

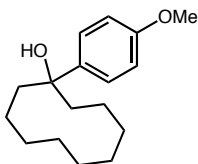

### 1-(4-methoxyphenyl)cyclodecan-1-ol

Prepared following the general procedure A with cyclodecan-1-one to afford the titled compound as a white solid (1.86 g, 39%).  $^1\text{H NMR}$  (500 MHz,  $\text{C}_6\text{D}_6$ )  $\delta$  7.41 (d,  $J = 8.9$  Hz, 2H), 6.86 (d,  $J = 8.9$  Hz, 2H), 3.37 (s, 3H), 1.95 (dt,  $J = 14.4, 6.1$  Hz, 2H), 1.83 (dt,  $J = 14.2, 6.7$  Hz, 2H), 1.60 – 1.36 (m, 14H).  $^{13}\text{C NMR}$  (126 MHz,  $\text{C}_6\text{D}_6$ )  $\delta$  158.5, 141.4, 126.3, 113.2, 76.5, 54.4, 35.5, 26.6, 26.0, 23.7, 21.6. **IR (neat):** 3363, 2920, 2845, 1610, 1582, 1510, 1483, 1442, 1297, 1245, 1178, 1038, 830  $\text{cm}^{-1}$ . **MS (EI):** exact mass calculated for  $[\text{M}-\text{H}_2\text{O}]^+$  ( $\text{C}_{17}\text{H}_{24}\text{O}$ ) requires  $m/z$  244.2, found  $m/z$  244.2.

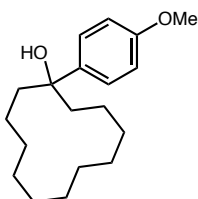

### 1-(4-methoxyphenyl)cyclododecan-1-ol

Prepared following the general procedure A with cyclododecanone to afford the titled compound as a white solid (2.93 g, 77%).  $^1\text{H NMR}$  (500 MHz,  $\text{C}_6\text{D}_6$ )  $\delta$  7.38 (d,  $J = 8.9$  Hz, 2H), 6.86 (d,  $J = 8.8$  Hz, 2H), 3.38 (s, 3H), 1.75 (ddt,  $J = 25.0, 13.4, 7.0$  Hz, 4H), 1.30 (tt,  $J = 18.8, 9.8$  Hz, 18H).  $^{13}\text{C NMR}$  (126 MHz,  $\text{C}_6\text{D}_6$ )  $\delta$  158.5, 141.1, 126.5, 113.2, 75.4, 54.5, 35.6, 26.4, 26.2, 22.5, 22.2, 20.0. **IR (neat):** 3334, 2933, 2848, 1609, 1509, 1470, 1178, 1038, 826, 737  $\text{cm}^{-1}$ . **MS (EI):** exact mass calculated for  $[\text{M}-\text{H}_2\text{O}]^+$  ( $\text{C}_{19}\text{H}_{28}\text{O}$ ) requires  $m/z$  272.2, found  $m/z$  272.1.

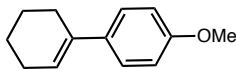

### 4'-methoxy-2,3,4,5-tetrahydro-1,1'-biphenyl

The titled compound was prepared according to a literature procedure.<sup>3</sup> Spectra are consistent with reported literature values.

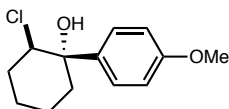

### (1S,2S)-2-chloro-1-(4-methoxyphenyl)cyclohexan-1-ol

Trichloroisocyanuric acid (0.460 g, 1.8 mmol) was added in small portions to a stirred solution

of 4'-methoxy-2,3,4,5-tetrahydro-1,1'-biphenyl (1.000 g, 5.3 mmol) in a degassed mixture of acetone (12 mL) and water (3 mL). Upon completion, aqueous sodium bicarbonate (30 mL, saturated) and CH<sub>2</sub>Cl<sub>2</sub> (30 mL) was added to the solution. The mixture was extracted with CH<sub>2</sub>Cl<sub>2</sub> (2 × 30 mL) and the combined organic layers were washed with brine, dried over Na<sub>2</sub>SO<sub>4</sub> and concentrated. The crude mixture was purified on silica gel to afford the titled compound as a pale lilac solid as a single diastereomer (0.95 g, 74%). **<sup>1</sup>H NMR (500 MHz, C<sub>6</sub>D<sub>6</sub>)** δ 7.30 (d, *J* = 8.8 Hz, 2H), 6.80 (d, *J* = 8.8 Hz, 2H), 4.14 (q, *J* = 2.8 Hz, 1H), 3.32 (s, 3H), 2.40 (td, *J* = 13.1, 4.0 Hz, 1H), 2.30 (ddt, *J* = 14.8, 13.4, 4.3 Hz, 1H), 1.86 – 1.71 (m, 2H), 1.65 (qt, *J* = 12.6, 3.6 Hz, 1H), 1.49 – 1.29 (m, 3H). **<sup>13</sup>C NMR (126 MHz, C<sub>6</sub>D<sub>6</sub>)** δ 159.1, 138.5, 127.0, 113.3, 73.7, 65.4, 54.4, 30.6, 30.2, 20.7, 19.2. **IR (neat):** 3451, 2938, 2864, 1610, 1514, 1443, 1295, 1249, 1180, 1148, 1035, 973, 827, 812, 795, 719 cm<sup>-1</sup>. **MS (EI):** exact mass calculated for [M-HCl]<sup>+</sup> (C<sub>13</sub>H<sub>16</sub>O<sub>2</sub>) requires *m/z* 204.1, found *m/z* 204.1.

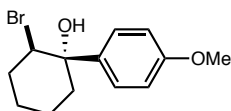

### 2-bromo-1-(4-methoxyphenyl)cyclohexan-1-ol

4'-methoxy-2,3,4,5-tetrahydro-1,1'-biphenyl (1.000 g, 5.3 mmol) was dissolved in degassed acetone (10 mL) and water (5 mL) with *N*-bromosuccinimide (0.947 g, 5.3 mmol). The mixture was stirred at 0 °C for an hour, then allowed to reach room temperature. Upon completion, 30 mL water was added to the reaction mixture and was extracted with ethyl acetate (4 × 30 mL). The combined organic layers were washed with brine, dried over Na<sub>2</sub>SO<sub>4</sub>, and concentrated. The crude mixture was purified on silica gel to afford the titled compound as an off-white solid as a single diastereomer (0.8 g, 53%). **<sup>1</sup>H NMR (500 MHz, C<sub>6</sub>D<sub>6</sub>)** δ 7.27 (d, *J* = 8.9 Hz, 1H), 6.79 (d, *J* = 8.8 Hz, 1H), 4.31 (td, *J* = 3.7, 3.3, 2.0 Hz, 1H), 3.31 (s, 2H), 2.53 – 2.44 (m, 1H), 2.35 (ddt, *J* = 14.2, 12.3, 3.5 Hz, 1H), 1.95 – 1.87 (m, 1H), 1.81 (qt, *J* = 12.7, 3.7 Hz, 1H), 1.72 – 1.60 (m, 1H), 1.45 (dq, *J* = 12.7, 4.4, 3.7, 2.1 Hz, 1H), 1.35 (dt, *J* = 13.4, 3.9 Hz, 1H). **<sup>13</sup>C NMR (126 MHz, C<sub>6</sub>D<sub>6</sub>)** δ 159.1, 139.0, 126.8, 113.3, 73.5, 60.6, 54.4, 33.5, 31.0, 20.8, 20.2. **IR (neat):** 3451, 2937, 2862, 2837, 1612, 1513, 1444, 1293, 1180, 1036, 968, 826, 809, 700, 673 cm<sup>-1</sup>. **MS (EI):** exact mass calculated for [M-HBr-H<sub>2</sub>O]<sup>+</sup> (C<sub>13</sub>H<sub>14</sub>O) requires *m/z* 186.1, found *m/z* 186.2.

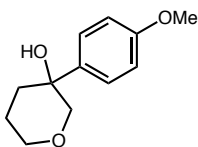

### 3-(4-methoxyphenyl)tetrahydro-2H-pyran-3-ol

Prepared following the general procedure B with dihydro-2H-pyran-3(4H)-one to afford the titled compound as a white solid (3.03 g, 58%). **<sup>1</sup>H NMR (500 MHz, C<sub>6</sub>D<sub>6</sub>)** δ 7.44 (d, *J* = 8.9 Hz, 2H), 6.83 (d, *J* = 8.9 Hz, 2H), 3.73 – 3.65 (m, 1H), 3.62 (dd, *J* = 11.4, 2.3 Hz, 1H), 3.40 (d, *J* = 11.5 Hz, 1H), 3.32 (s, 3H), 3.11 (td, *J* = 11.2, 2.6 Hz, 1H), 3.02 (bs, 1H), 1.85 – 1.62 (m, 3H), 1.16 – 1.04 (m, 1H). **<sup>13</sup>C NMR (126 MHz, C<sub>6</sub>D<sub>6</sub>)** δ 158.9, 136.8, 126.5, 113.5, 76.9, 70.3, 67.5, 54.5, 35.5, 22.2. **IR (neat):** 3431, 2949, 2843, 1609, 1512, 1302, 1246, 1177, 1082, 1034, 1016, 916, 827, 793, 731 cm<sup>-1</sup>. **HRMS (EI):** exact mass calculated for [M]<sup>+</sup> (C<sub>12</sub>H<sub>16</sub>O<sub>3</sub>) requires *m/z* 208.1094, found *m/z* 208.1093.

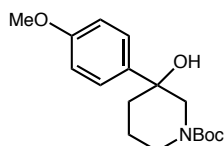

### ***tert*-butyl 3-hydroxy-3-(4-methoxyphenyl)piperidine-1-carboxylate**

Prepared following the general procedure B with *tert*-butyl 3-oxopiperidine-1-carboxylate to afford the titled compound as a colorless oil (2.01 g, 43%). **<sup>1</sup>H NMR (500 MHz, C<sub>6</sub>D<sub>6</sub>)** δ 7.33 (d, *J* = 8.6 Hz, 2H), 6.80 (d, *J* = 8.8 Hz, 2H), 4.24 – 3.96 (m, 2H), 3.32 (s, 3H), 2.97 (d, *J* = 13.6 Hz, 1H), 2.56 (t, *J* = 12.6 Hz, 1H), 1.76 (t, *J* = 6.7 Hz, 1H), 1.61 – 1.49 (m, 1H), 1.45 (s, 9H), 1.18 – 1.07 (m, 2H). **<sup>13</sup>C NMR (75 MHz, C<sub>6</sub>D<sub>6</sub>, 50 °C)** δ 159.4, 156.0, 138.7, 126.6, 114.1, 79.5, 71.7, 55.4, 54.9, 44.5, 37.4, 28.6, 21.8. **IR (neat):** 3441, 2947, 1678, 1513, 1419, 1365, 1244, 1148, 1035, 827, 733 cm<sup>-1</sup>. **MS (ESI):** exact mass calculated for [M-Boc-H<sub>2</sub>O+2H]<sup>+</sup> (C<sub>12</sub>H<sub>16</sub>NO) requires *m/z* 190.1, found *m/z* 190.1.

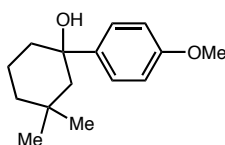

### **1-(4-methoxyphenyl)-3,3-dimethylcyclohexan-1-ol**

Prepared following the general procedure A with 3,3-dimethylcyclohexan-1-one to afford the titled compound as a colorless oil (0.74 g, 43%). **<sup>1</sup>H NMR (500 MHz, C<sub>6</sub>D<sub>6</sub>)** δ 7.31 (d, *J* = 8.8 Hz, 2H), 6.84 (d, *J* = 8.8 Hz, 2H), 3.36 (s, 3H), 2.04 – 1.91 (m, 1H), 1.65 – 1.39 (m, 6H), 1.25 (s, 3H), 1.10 (td, *J* = 13.3, 12.2, 4.0 Hz, 1H), 0.86 (s, 3H). **<sup>13</sup>C NMR (126 MHz, C<sub>6</sub>D<sub>6</sub>)** δ 158.5, 142.7, 125.8, 113.3, 73.6, 54.5, 51.0, 38.8, 34.1, 31.0, 27.2, 19.0. **IR (neat):** 3476, 2996, 2940, 2865, 2839, 1610, 1510, 1458, 1298, 1179, 1036, 989, 825, 795 cm<sup>-1</sup>. **HRMS (EI):** exact mass calculated for [M]<sup>+</sup> (C<sub>15</sub>H<sub>22</sub>O<sub>2</sub>) requires *m/z* 234.1614, found *m/z* 234.1612.

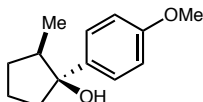

### **1-(4-methoxyphenyl)-2-methylcyclopentanol**

Prepared following general procedure A with 2-methylcyclopentanone to afford the titled compound as a colorless oil as a single diastereomer (0.9 g, 29%). Spectra are consistent with reported literature values.<sup>4</sup>

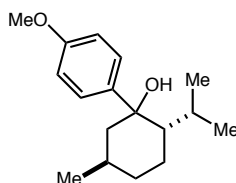

### **(2*S*,5*R*)-2-isopropyl-1-(4-methoxyphenyl)-5-methylcyclohexan-1-ol**

Prepared following the general procedure B with menthone to afford the titled compound as a colorless oil as an ~ 3:1 mixture of diastereomers (1.3 g, 48%), which was carried on together to the next step without further separation. Characterization of this mixture is given herein. **<sup>1</sup>H NMR (500 MHz, CDCl<sub>3</sub>)** δ 7.35 (d, *J* = 8.9 Hz, 2H), 6.88 (d, *J* = 9.1 Hz, 2H), 3.81 (s, 3H), 1.89 – 1.84 (m, 1H), 1.83 – 1.77 (m, 1H), 1.68 – 1.59 (m, 3H), 1.56 – 1.49 (m, 1H), 1.45 – 1.39 (m, 1H), 1.23 (d, *J* = 7.3 Hz, 1H), 1.07 – 0.98 (m, 1H), 0.89 (d, *J* = 6.5 Hz, 3H), 0.82 (d, *J* = 6.9 Hz,

3H), 0.73 (d,  $J = 6.9$  Hz, 3H).  $^{13}\text{C}$  NMR (126 MHz,  $\text{C}_6\text{D}_6$ )  $\delta$  158.3, 140.9, 125.8, 113.4, 77.6, 54.4, 51.7, 50.2, 35.2, 28.2, 26.7, 23.6, 22.2, 21.2, 18.3. IR (neat): 3521, 2949, 2868, 1732, 1609, 1509, 1243, 1175, 1037, 826  $\text{cm}^{-1}$ . MS (ESI): exact mass calculated for  $[\text{M}-\text{H}_2\text{O}+\text{H}]^+$  ( $\text{C}_{17}\text{H}_{25}\text{O}$ ) requires  $m/z$  245.2, found  $m/z$  245.2.

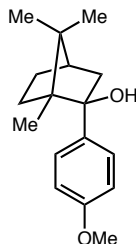

**(1R,2S,4R)-2-(4-methoxyphenyl)-1,7,7-trimethylbicyclo[2.2.1]heptan-2-ol**

The titled compound was prepared according to a literature procedure.<sup>5</sup> Spectra are consistent with reported literature values.

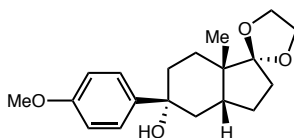

**(3aR,7aS)-5-(4-methoxyphenyl)-7a-methyloctahydrospiro[indene-1,2'-[1,3]dioxolan]-5-ol**

Prepared following the general procedure B with (3aR,7aS)-7a-methylhexahydrospiro[indene-1,2'-[1,3]dioxolan]-5(4H)-one (prepared according to a literature procedure<sup>6</sup>) to afford the titled compound as a colorless oil as a single diastereomer (0.701 g, 45%).  $^1\text{H}$  NMR (500 MHz,  $\text{C}_6\text{D}_6$ )  $\delta$  7.32 (d,  $J = 8.8$  Hz, 2H), 6.84 (d,  $J = 8.8$  Hz, 2H), 3.58 – 3.50 (m, 4H), 3.36 (s, 3H), 2.64 – 2.54 (m, 1H), 2.25 (td,  $J = 12.1, 11.1, 5.0$  Hz, 1H), 2.19 – 2.10 (m, 2H), 2.04 – 1.93 (m, 1H), 1.90 – 1.80 (m, 3H), 1.79 – 1.71 (m, 1H), 1.63 – 1.48 (m, 2H), 1.14 (s, 3H).  $^{13}\text{C}$  NMR (126 MHz,  $\text{C}_6\text{D}_6$ )  $\delta$  158.6, 142.6, 125.8, 120.5, 113.4, 72.9, 64.9, 63.8, 54.5, 44.1, 41.5, 37.4, 34.3, 32.9, 25.8, 24.8, 17.2. IR (neat): 3483, 2956, 1608, 1507, 1248, 1175, 1016, 1034, 947, 831  $\text{cm}^{-1}$ . MS (ESI): exact mass calculated for  $[\text{M}+\text{H}]^+$  ( $\text{C}_{19}\text{H}_{27}\text{O}_4$ ) requires  $m/z$  319.2, found  $m/z$  319.1.

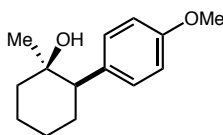

**2-(4-methoxyphenyl)-1-methylcyclohexan-1-ol**

Prepared following the general procedure A with methylmagnesium bromide (3.0 M in  $\text{Et}_2\text{O}$ ) and 2-(4-methoxyphenyl)cyclohexan-1-one (racemic starting material prepared according to a literature procedure<sup>7</sup>) to afford the titled compound as a colorless oil as a single diastereomer (0.59 g, 99%).  $^1\text{H}$  NMR (500 MHz,  $\text{C}_6\text{D}_6$ )  $\delta$  7.14 (d,  $J = 8.6$  Hz, 2H), 6.81 (d,  $J = 8.8$  Hz, 2H), 3.35 (s, 3H), 2.24 (dd,  $J = 12.9, 3.4$  Hz, 1H), 2.10 (qd,  $J = 12.9, 3.6$  Hz, 1H), 1.86 (qt,  $J = 13.4, 3.8$  Hz, 1H), 1.76 (dq,  $J = 13.0, 2.9$  Hz, 1H), 1.68 (dt,  $J = 12.2, 3.4$  Hz, 1H), 1.62 – 1.54 (m, 1H), 1.54 – 1.46 (m, 1H), 1.31 – 1.15 (m, 2H), 0.86 (s, 3H), 0.82 (s, 1H).  $^{13}\text{C}$  NMR (126 MHz,  $\text{C}_6\text{D}_6$ )  $\delta$  158.5, 135.2, 129.9, 113.4, 70.1, 54.4, 52.3, 40.3, 29.9, 29.0, 26.7, 22.0. IR (neat): 3499, 2928, 2856, 1609, 1510, 1448, 1243, 1178, 1035, 826, 800  $\text{cm}^{-1}$ . MS (ESI): exact mass for  $[\text{M}-\text{H}_2\text{O}+\text{H}]^+$  ( $\text{C}_{14}\text{H}_{19}\text{O}$ ) requires  $m/z$  203.1, found  $m/z$  203.1.



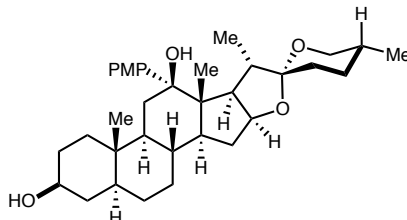

**(2a*S*,4*S*,5'*R*,6a*S*,6b*S*,8a*S*,8b*R*,9*S*,10*R*,11a*S*,12a*S*)-8-(4-methoxyphenyl)-5',6a,8a,9-tetramethyldocosahydrospiro[naphtho[2',1':4,5]indeno[2,1-*b*]furan-10,2'-pyran]-4,8-diol**

Prepared following the general procedure B with hecogenin acetate (1 equiv), 1-iodo-4-methoxybenzene (8 equiv), and Mg (8.4 equiv) to afford the titled compound as a white solid as a single diastereomer (2.02 g, 89%). <sup>1</sup>H NMR (500 MHz, C<sub>6</sub>D<sub>6</sub>) δ 7.43 (d, *J* = 8.8 Hz, 2H), 6.86 (d, *J* = 8.9 Hz, 2H), 4.69 (ddd, *J* = 8.7, 7.4, 6.2 Hz, 1H), 3.59 – 3.51 (m, 2H), 3.42 – 3.31 (m, 1H), 3.35 (s, 3H), 2.93 (dd, *J* = 8.7, 6.6 Hz, 1H), 2.24 (ddd, *J* = 14.0, 10.9, 6.0 Hz, 1H), 2.18 – 2.05 (m, 2H), 1.60 – 1.35 (m, 11H), 1.33 – 1.24 (m, 2H), 1.24 – 1.16 (m, 2H), 1.16 – 1.07 (m, 3H), 1.03 (ddd, *J* = 12.4, 10.7, 4.1 Hz, 1H), 0.95 (s, 3H), 0.85 (d, *J* = 7.0 Hz, 3H), 0.73 (s, 3H), 0.69 – 0.61 (m, 1H), 0.59 (d, *J* = 6.4 Hz, 4H), 0.51 (bs, 1H). <sup>13</sup>C NMR (126 MHz, C<sub>6</sub>D<sub>6</sub>) δ 158.7, 139.1, 128.3, 112.6, 108.7, 80.7, 76.4, 70.7, 66.7, 54.5, 53.0, 49.9, 49.5, 49.1, 44.7, 42.5, 38.4, 36.8, 35.6, 35.1, 34.6, 31.8, 31.8, 31.7, 31.5, 30.3, 28.9, 28.6, 17.0, 15.3, 14.5, 12.2. IR (neat): 3424, 2927, 2859, 1609, 1510, 1457, 1296, 1247, 1179, 1178, 1044, 981, 899, 865, 832, 737 cm<sup>-1</sup>. MS (ESI): exact mass calculated for [M+H]<sup>+</sup> (C<sub>34</sub>H<sub>51</sub>O<sub>5</sub>) requires *m/z* 539.4, found *m/z* 539.4.

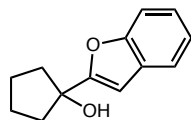

**1-(benzofuran-2-yl)cyclopentanol**

Prepared following general procedure C with benzofuran and cyclopentanone to afford the titled compound as a white solid (1.6 g, 54%). <sup>1</sup>H NMR (500 MHz, C<sub>6</sub>D<sub>6</sub>) δ 7.40 (d, *J* = 7.4 Hz, 1H), 7.35 (d, *J* = 7.9 Hz, 1H), 7.12 – 7.05 (m, 2H), 6.36 (s, 1H), 2.06 – 1.98 (m, 2H), 1.86 – 1.77 (m, 4H), 1.60 – 1.53 (m, 2H), 1.28 (s, 1H). <sup>13</sup>C NMR (126 MHz, C<sub>6</sub>D<sub>6</sub>) δ 162.5, 155.0, 128.7, 123.8, 122.7, 120.8, 111.1, 101.0, 79.4, 39.8, 23.8. IR (neat): 3372, 2960, 2874, 1451, 1251, 1170, 1009, 985, 806, 750, 741 cm<sup>-1</sup>. MS (EI): exact mass calculated for [M•]<sup>+</sup> (C<sub>13</sub>H<sub>14</sub>O<sub>2</sub>) requires *m/z* 202.1, found *m/z* 202.1. *E*<sub>p/2</sub> (vs. Fc/Fc<sup>+</sup>) = 1.27 V.

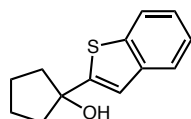

**1-(benzo[*b*]thiophen-2-yl)cyclopentanol**

Prepared following general procedure C with benzo[*b*]thiophene and cyclopentanone to afford the titled compound as a pale-yellow solid (1.9 g, 58%). <sup>1</sup>H NMR (500 MHz, C<sub>6</sub>D<sub>6</sub>) δ 7.57 – 7.54 (m, 2H), 7.20 – 7.17 (m, 1H), 7.08 – 7.05 (m, 1H), 6.92 (s, 1H), 1.91 – 1.78 (m, 6H), 1.59 – 1.53 (m, 2H), 1.29 (s, 1H). <sup>13</sup>C NMR (126 MHz, C<sub>6</sub>D<sub>6</sub>) δ 153.5, 140.1, 139.6, 124.1, 123.8, 123.2, 122.3, 118.5, 81.3, 42.5, 23.6. IR (neat): 3369, 2957, 2872, 1457, 1435, 1304, 1068, 1000, 828, 743, 726 cm<sup>-1</sup>. HRMS (EI): exact mass calculated for [M•]<sup>+</sup> (C<sub>13</sub>H<sub>14</sub>OS) requires *m/z* 218.0760, found *m/z* 218.0758. *E*<sub>p/2</sub> (vs. Fc/Fc<sup>+</sup>) = 1.18 V.

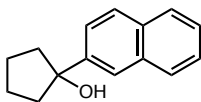

### 1-(naphthalen-2-yl)cyclopentanol

Prepared following general procedure C with 2-bromonaphthalene and cyclopentanone to afford the titled compound as a white solid (1.5 g, 35%). **<sup>1</sup>H NMR (500 MHz, C<sub>6</sub>D<sub>6</sub>)** δ 7.90 (s, 1H), 7.73 (d, *J* = 7.9 Hz, 1H), 7.67 (t, *J* = 8.2 Hz, 2H), 7.45 (d, *J* = 8.7 Hz, 1H), 7.30 (p, *J* = 7.0 Hz, 2H), 1.97 – 1.79 (m, 6H), 1.68 – 1.62 (m, 2H), 0.99 (s, 1H). **<sup>13</sup>C NMR (126 MHz, C<sub>6</sub>D<sub>6</sub>)** δ 144.9, 133.5, 132.6, 128.1, 128.0, 127.8, 125.9, 125.5, 124.3, 123.2, 82.9, 41.9, 24.1. **IR (neat):** 3380, 2957, 2871, 1350, 1274, 1193, 1004, 856, 816, 745 cm<sup>-1</sup>. **MS (EI):** exact mass calculated for [M•]<sup>+</sup> (C<sub>15</sub>H<sub>16</sub>O) requires *m/z* 212.1, found *m/z* 212.1. *E<sub>p/2</sub>* (vs. Fc/Fc<sup>+</sup>) = 1.24 V.

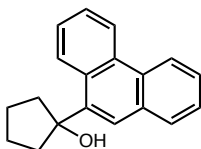

### 1-(phenanthren-9-yl)cyclopentanol

Prepared following general procedure C with 9-bromophenanthrene and cyclopentanone to afford the titled compound as a viscous oil (1.1 g, 41%). **<sup>1</sup>H NMR (500 MHz, C<sub>6</sub>D<sub>6</sub>)** δ 8.96 (d, *J* = 8.5 Hz, 1H), 8.58 (d, *J* = 8.1 Hz, 1H), 8.49 – 8.47 (m, 1H), 7.73 – 7.70 (m, 1H), 7.66 (s, 1H), 7.50 – 7.41 (m, 4H), 2.16 – 2.04 (m, 4H), 2.00 – 1.91 (m, 2H), 1.64 – 1.56 (m, 2H), 1.24 (s, 1H). **<sup>13</sup>C NMR (126 MHz, C<sub>6</sub>D<sub>6</sub>)** δ 140.3, 131.7, 131.4, 131.2, 130.5, 128.8, 128.6, 126.6, 126.5, 125.9, 125.8, 123.6, 123.1, 122.5, 83.4, 40.4, 23.7. **IR (neat):** 3554, 3377, 2953, 2871, 1449, 1185, 1000, 889, 767, 746, 726 cm<sup>-1</sup>. **MS (EI):** exact mass calculated for [M•]<sup>+</sup> (C<sub>19</sub>H<sub>18</sub>O) requires *m/z* 262.1, found *m/z* 262.1. *E<sub>p/2</sub>* (vs. Fc/Fc<sup>+</sup>) = 1.22 V.

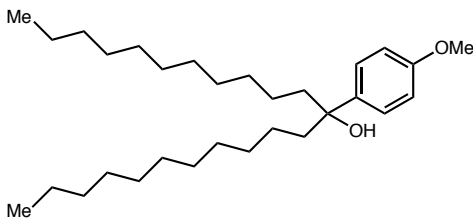

### 12-(4-methoxyphenyl)tricosan-12-ol

Prepared following general procedure A with tricosan-12-one to afford the titled compound as a colorless liquid (2.6 g, 38%). **<sup>1</sup>H NMR (500 MHz, C<sub>6</sub>D<sub>6</sub>)** δ 7.34 (d, *J* = 8.5 Hz, 2H), 6.86 (d, *J* = 8.5 Hz, 2H), 3.33 (s, 3H), 1.82 – 1.68 (m, 4H), 1.43 – 1.16 (m, 37H), 0.91 (t, *J* = 6.9 Hz, 6H). **<sup>13</sup>C NMR (126 MHz, C<sub>6</sub>D<sub>6</sub>)** δ 158.3, 138.7, 126.5, 113.4, 76.2, 54.4, 43.6, 32.0, 30.3, 29.79, 29.76, 29.74, 29.5, 23.6, 22.8, 14.0. **IR (neat):** 3475, 2922, 2852, 1612, 1511, 1464, 1247, 1178, 1039, 830 cm<sup>-1</sup>. **HRMS (EI):** exact mass calculated for [M-H<sub>2</sub>O]<sup>+</sup> (C<sub>30</sub>H<sub>52</sub>O) requires *m/z* 428.4013, found *m/z* 428.4023.

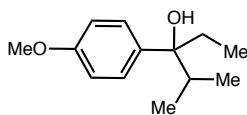

### 3-(4-methoxyphenyl)-2-methylpentan-3-ol

Prepared following general procedure B with 2-methylpentan-3-one to afford the titled compound as a colorless oil (1.1 g, 55%). **<sup>1</sup>H NMR (500 MHz, C<sub>6</sub>D<sub>6</sub>)** δ 7.23 (d, *J* = 8.8 Hz, 2H),

6.83 (d,  $J = 8.8$  Hz, 2H), 3.34 (s, 3H), 1.83 (p,  $J = 6.8$  Hz, 1H), 1.65 (q,  $J = 7.4$  Hz, 2H), 1.06 (s, 1H), 0.89 (d,  $J = 6.8$  Hz, 3H), 0.74 (d,  $J = 6.9$  Hz, 3H), 0.67 (t,  $J = 7.4$  Hz, 3H).  $^{13}\text{C}$  NMR (126 MHz,  $\text{C}_6\text{D}_6$ )  $\delta$  158.2, 137.1, 127.1, 113.1, 78.5, 54.4, 37.8, 32.2, 17.4, 16.5, 7.8. IR (neat): 3513, 2965, 2937, 2877, 1611, 1510, 1463, 1295, 1245, 1177, 1036, 973, 826  $\text{cm}^{-1}$ . MS (EI): exact mass calculated for  $[\text{M}\cdot]^+$  ( $\text{C}_{13}\text{H}_{20}\text{O}_2$ ) requires  $m/z$  208.1, found  $m/z$  208.1.

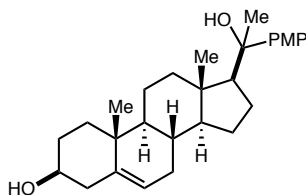

**(3S,9S,10R,13S,14S,17S)-17-(1-hydroxy-1-(4-methoxyphenyl)ethyl)-10,13-dimethyl-2,3,4,7,8,9,10,11,12,13,14,15,16,17-tetradecahydro-1H-cyclopenta[a]phenanthren-3-ol**

Prepared following the general procedure C with pregnenolone (1 equiv), 1-bromo-4-methoxybenzene (4 equiv), and *t*-BuLi (4 equiv) to afford the titled compound as a white solid as an  $\sim 2:1$  mixture of diastereomers (0.95 g, 35%). The mixture of diastereomers was carried on together to the next step (characterization is given for the major diastereomer, which was separated by preparative SFC).  $^1\text{H}$  NMR (500 MHz,  $\text{C}_6\text{D}_6$ )  $\delta$  7.35 (d,  $J = 8.8$  Hz, 2H), 6.88 (d,  $J = 8.8$  Hz, 2H), 5.37 – 5.32 (m, 1H), 3.37 (s, 3H), 2.28 – 2.15 (m, 2H), 1.98 – 1.89 (m, 2H), 1.74 – 1.49 (m, 6H), 1.43 – 1.31 (m, 2H), 1.29 (s, 3H), 1.26 (bs, 1H), 1.19 – 1.02 (m, 3H), 0.90 (s, 3H), 0.89 – 0.84 (m, 2H), 0.82 (s, 3H), 0.82 – 0.75 (m, 2H), 0.67 – 0.53 (m, 3H).  $^{13}\text{C}$  NMR (126 MHz,  $\text{C}_6\text{D}_6$ )  $\delta$  158.7, 141.5, 141.3, 126.6, 121.5, 113.3, 75.5, 71.7, 60.7, 57.2, 54.8, 50.6, 43.1, 42.9, 39.3, 37.7, 36.8, 32.8, 32.3, 32.1, 31.7, 24.1, 23.3, 21.1, 19.5, 13.7. IR (neat): 3569, 3456, 2968, 2933, 2903, 2823, 1610, 1510, 1441, 1295, 1179, 1055, 1030, 839, 819, 736  $\text{cm}^{-1}$ . MS (ESI): exact mass calculated for  $[\text{M}-\text{H}_2\text{O}+\text{H}]^+$  ( $\text{C}_{28}\text{H}_{39}\text{O}_2$ ) requires  $m/z$  407.3, found  $m/z$  407.1.

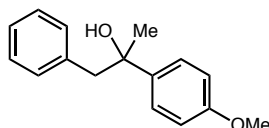

**2-(4-methoxyphenyl)-1-phenylpropan-2-ol**

The titled compound was prepared according to a literature procedure,<sup>8</sup> using 1-(4-methoxyphenyl)ethan-1-one.  $^1\text{H}$  NMR (500 MHz,  $\text{C}_6\text{D}_6$ )  $\delta$  7.22 (d,  $J = 8.9$  Hz, 2H), 7.10 – 7.01 (m, 3H), 6.98 – 6.94 (m, 2H), 6.79 (d,  $J = 8.9$  Hz, 2H), 3.32 (s, 3H), 2.98 (d,  $J = 13.2$  Hz, 1H), 2.89 (d,  $J = 13.2$  Hz, 1H), 1.44 (s, 1H), 1.37 (s, 3H).  $^{13}\text{C}$  NMR (126 MHz,  $\text{C}_6\text{D}_6$ )  $\delta$  158.9, 140.4, 137.7, 131.0, 128.2, 126.7, 126.7, 113.6, 74.1, 54.8, 51.1, 29.7. IR (neat): 3455, 2971, 2932, 1611, 1511, 1454, 1298, 1247, 1178, 1090, 1032, 832, 703  $\text{cm}^{-1}$ . HRMS (EI): exact mass calculated for  $[\text{M}-\text{H}_2\text{O}]^+$  ( $\text{C}_{16}\text{H}_{16}\text{O}$ ) requires  $m/z$  224.1196, found  $m/z$  224.1199.  $E_{p/2}$  (vs.  $\text{Fc}/\text{Fc}^+$ ) = 1.14V.

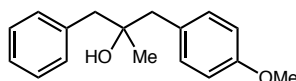

**1-(4-methoxyphenyl)-2-methyl-3-phenylpropan-2-ol**

The titled compound was prepared in an analogous fashion as the above compound, using 1-(4-methoxyphenyl)propan-2-one.  $^1\text{H}$  NMR (500 MHz,  $\text{C}_6\text{D}_6$ )  $\delta$  7.18 – 7.13 (m, 4H), 7.13 – 7.07 (m, 1H), 7.04 (d,  $J = 8.6$  Hz, 2H), 6.78 (d,  $J = 8.6$  Hz, 2H), 3.32 (s, 3H), 2.69 (dd,  $J = 21.2, 13.3$

Hz, 2H), 2.58 (dd,  $J = 16.7, 13.4$  Hz, 2H), 0.91 (s, 3H).  $^{13}\text{C}$  NMR (126 MHz,  $\text{C}_6\text{D}_6$ )  $\delta$  158.6, 138.0, 131.6, 130.8, 129.6, 128.2, 126.2, 113.5, 72.0, 54.4, 48.3, 47.5, 26.1. IR (neat): 3475, 3028, 2925, 2836, 1610, 1510, 1453, 1376, 1242, 1177, 1112, 1033, 832, 761, 735, 700  $\text{cm}^{-1}$ . HRMS (EI): exact mass calculated for  $[\text{M}-\text{H}_2\text{O}]^+$  ( $\text{C}_{17}\text{H}_{18}\text{O}$ ) requires  $m/z$  238.1352, found  $m/z$  238.1353.  $E_{p/2}$  (vs.  $\text{Fc}/\text{Fc}^+$ ) = 1.13 V.

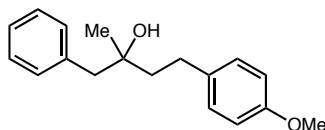

#### 4-(4-methoxyphenyl)-2-methyl-1-phenylbutan-2-ol

The titled compound was prepared in an analogous fashion as the above compound, using 4-(4-methoxyphenyl)butan-2-one.  $^1\text{H}$  NMR (500 MHz,  $\text{C}_6\text{D}_6$ )  $\delta$  7.18 – 7.12 (m, 4H), 7.11 – 7.06 (m, 1H), 7.01 (d,  $J = 8.5$  Hz, 2H), 6.80 (d,  $J = 8.6$  Hz, 2H), 3.34 (s, 3H), 2.74 – 2.50 (m, 4H), 1.73 – 1.59 (m, 2H), 1.00 (s, 3H).  $^{13}\text{C}$  NMR (126 MHz,  $\text{C}_6\text{D}_6$ )  $\delta$  158.1, 137.8, 134.6, 130.6, 129.2, 128.2, 126.3, 113.9, 71.7, 54.5, 48.2, 44.2, 29.5, 26.3. IR (neat): 3449, 3028, 2935, 2835, 1612, 1511, 1457, 1300, 1243, 1177, 1033, 821, 726, 701  $\text{cm}^{-1}$ . HRMS (EI): exact mass calculated for  $[\text{M}-\text{H}_2\text{O}]^+$  ( $\text{C}_{18}\text{H}_{20}\text{O}$ ) requires  $m/z$  252.1509, found  $m/z$  252.1511.  $E_{p/2}$  (vs.  $\text{Fc}/\text{Fc}^+$ ) = 1.16 V.

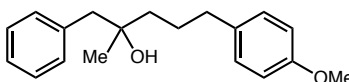

#### 5-(4-methoxyphenyl)-2-methyl-1-phenylpentan-2-ol

Prepared following the general procedure B with 1-phenylpropan-2-one (from oxidation of 1-phenylpropan-2-ol) and 1-(3-bromopropyl)-4-methoxybenzene to afford the titled compound as a colorless oil (0.48 g, 48%).  $^1\text{H}$  NMR (500 MHz,  $\text{C}_6\text{D}_6$ )  $\delta$  7.17 – 7.06 (m, 5H), 7.01 (d,  $J = 8.5$  Hz, 2H), 6.83 (d,  $J = 8.6$  Hz, 2H), 3.35 (s, 3H), 2.54 (dd,  $J = 49.1, 13.1$  Hz, 2H), 2.44 (t,  $J = 7.6$  Hz, 2H), 1.65 (dddd,  $J = 22.5, 13.0, 9.4, 5.5$  Hz, 2H), 1.43 – 1.29 (m, 2H), 0.93 (s, 3H).  $^{13}\text{C}$  NMR (126 MHz,  $\text{C}_6\text{D}_6$ )  $\delta$  158.2, 137.9, 134.4, 130.6, 129.3, 128.2, 126.2, 113.8, 71.7, 54.5, 48.0, 41.4, 35.5, 26.4, 26.2. IR (neat): 3451, 3028, 2938, 1612, 1512, 1454, 1245, 1177, 1115, 1035, 927, 830, 729, 702  $\text{cm}^{-1}$ . HRMS (EI): exact mass calculated for  $[\text{M}-\text{H}_2\text{O}]^+$  ( $\text{C}_{19}\text{H}_{22}\text{O}$ ) requires  $m/z$  266.1665, found  $m/z$  266.1665.  $E_{p/2}$  (vs.  $\text{Fc}/\text{Fc}^+$ ) = 1.16 V.

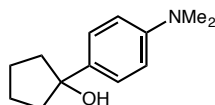

#### 1-(4-(dimethylamino)phenyl)cyclopentanol

Prepared following general procedure A with 1-(4-(dimethylamino)phenyl)magnesium bromide (0.5 M in THF, 2.1 equiv) and cyclopentanone to afford the titled compound as a pale-yellow powder (0.8 g, 66%).  $^1\text{H}$  NMR (500 MHz,  $\text{C}_6\text{D}_6$ )  $\delta$  7.41 (d,  $J = 8.8$  Hz, 2H), 6.66 (d,  $J = 8.8$  Hz, 2H), 2.56 (s, 6H), 1.98 – 1.88 (m, 6H), 1.69 – 1.62 (m, 2H), 0.99 (s, 1H).  $^{13}\text{C}$  NMR (126 MHz,  $\text{C}_6\text{D}_6$ )  $\delta$  149.6, 135.7, 126.0, 112.5, 82.6, 41.5, 40.1, 23.8. IR (neat): 3353, 2964, 2948, 2851, 1612, 1521, 1329, 1208, 1134, 997, 835, 814  $\text{cm}^{-1}$ . MS (EI): exact mass calculated for  $[\text{M}-\text{H}_2\text{O}]^+$  ( $\text{C}_{13}\text{H}_{17}\text{N}$ ) requires  $m/z$  187.1, found  $m/z$  187.2.  $E_{p/2}$  (vs.  $\text{Fc}/\text{Fc}^+$ ) = 0.39 V.

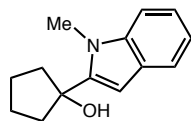

### 1-(1-methyl-1*H*-indol-2-yl)cyclopentanol

Prepared following general procedure C with 1-methyl-1*H*-indole and cyclopentanone to afford the titled compound as a yellow solid (0.7 g, 27%). <sup>1</sup>H NMR (500 MHz, C<sub>6</sub>D<sub>6</sub>) δ 7.72 (d, *J* = 7.6 Hz, 1H), 7.27 (dt, *J* = 21.1, 7.3 Hz, 2H), 7.13 (d, *J* = 7.9 Hz, 1H), 6.28 (s, 1H), 3.49 (s, 3H), 1.91 – 1.76 (m, 6H), 1.56 – 1.50 (m, 2H), 0.74 (s, 1H). <sup>13</sup>C NMR (126 MHz, C<sub>6</sub>D<sub>6</sub>) δ 143.9, 138.9, 127.3, 121.6, 120.7, 119.5, 109.0, 98.6, 79.0, 39.8, 30.9, 23.6. IR (neat): 3378, 2951, 2872, 1468, 1385, 1313, 993, 779, 749, 732 cm<sup>-1</sup>. HRMS (EI): exact mass calculated for [M]<sup>+</sup> (C<sub>14</sub>H<sub>17</sub>NO) requires *m/z* 215.1305, found *m/z* 215.1301. *E*<sub>p/2</sub> (vs. Fc/Fc<sup>+</sup>) = 0.69 V.

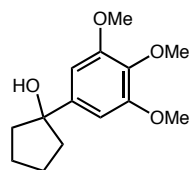

### 1-(3,4,5-trimethoxyphenyl)cyclopentanol

Prepared following the general procedure C with 5-bromo-1,2,3-trimethoxybenzene to afford the titled compound as an off-white solid (1.6 g, 78%). <sup>1</sup>H NMR (500 MHz, C<sub>6</sub>D<sub>6</sub>) δ 6.73 (s, 2H), 3.87 (s, 3H), 3.48 (s, 6H), 1.98 – 1.88 (m, 2H), 1.88 – 1.79 (m, 4H), 1.72 – 1.60 (m, 2H). <sup>13</sup>C NMR (126 MHz, C<sub>6</sub>D<sub>6</sub>) δ 153.5, 142.9, 138.1, 103.3, 83.0, 60.2, 55.7, 42.0, 23.9. IR (neat): 3440, 2945, 2872, 2836, 1587, 1509, 1451, 1410, 1236, 1003, 831, 731, 652 cm<sup>-1</sup>. HRMS (EI): exact mass calculated for [M]<sup>+</sup> (C<sub>14</sub>H<sub>20</sub>O<sub>4</sub>) requires *m/z* 252.1356, found *m/z* 252.1352. *E*<sub>p/2</sub> (vs. Fc/Fc<sup>+</sup>) = 0.92 V.

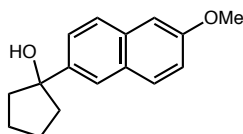

### 1-(6-methoxynaphthalen-2-yl)cyclopentanol

Prepared following the general procedure C with 2-bromo-6-methoxynaphthalene to afford the titled compound as a white solid (1.5 g, 73%). <sup>1</sup>H NMR (500 MHz, C<sub>6</sub>D<sub>6</sub>) δ 7.84 (d, *J* = 1.8 Hz, 1H), 7.64 (d, *J* = 8.5 Hz, 1H), 7.59 (d, *J* = 8.9 Hz, 1H), 7.52 (dd, *J* = 8.5, 1.9 Hz, 1H), 7.24 (dd, *J* = 8.9, 2.5 Hz, 1H), 6.99 (d, *J* = 2.4 Hz, 1H), 3.41 (s, 3H), 2.02 – 1.81 (m, 4H), 1.72 – 1.62 (m, 2H). <sup>13</sup>C NMR (126 MHz, C<sub>6</sub>D<sub>6</sub>) δ 157.8, 142.6, 133.8, 129.6, 128.9, 126.7, 124.8, 123.3, 119.0, 105.6, 82.9, 54.5, 41.8, 24.0. IR (neat): 3443, 3052, 3007, 2953, 2870, 2843, 1603, 1484, 1387, 1265, 1202, 1028, 986, 854, 814, 671 cm<sup>-1</sup>. HRMS (EI): exact mass calculated for [M-H<sub>2</sub>O]<sup>+</sup> (C<sub>16</sub>H<sub>16</sub>O) requires *m/z* 224.1196, found *m/z* 224.1196. *E*<sub>p/2</sub> (vs. Fc/Fc<sup>+</sup>) = 0.96 V.

## Synthesis of Products

### General procedure:

A screw cap culture tube (16 × 125 mm) outfitted with a PTFE/silicone septa was charged with the relevant alcohol (1 mmol, 1 equiv),<sup>9</sup> [Ir(dF(CF<sub>3</sub>)ppy)<sub>2</sub>(5,5'-d(CF<sub>3</sub>)bpy)](PF<sub>6</sub>) (0.01 mmol, 0.01 equiv, 11 mg) and redistilled collidine (3 mmol, 3 equiv, 396 μL). The sealed culture tube was then evacuated and backfilled with argon three times. Redistilled thiophenol (0.25 mmol, 0.25 equiv, 26 μL) and 10 mL of degassed anhydrous CH<sub>2</sub>Cl<sub>2</sub> were added via syringe. The reaction was irradiated by four blue LED lamps (Kessil H150B LED Grow Light), and let stir under an inert atmosphere at room temperature with a fan to cool the reaction setup. After 12–24 hours, the reaction was concentrated then purified by flash column chromatography (hexanes/EtOAc) to obtain the product. All scale-ups were run in duplicates and average yields are reported.

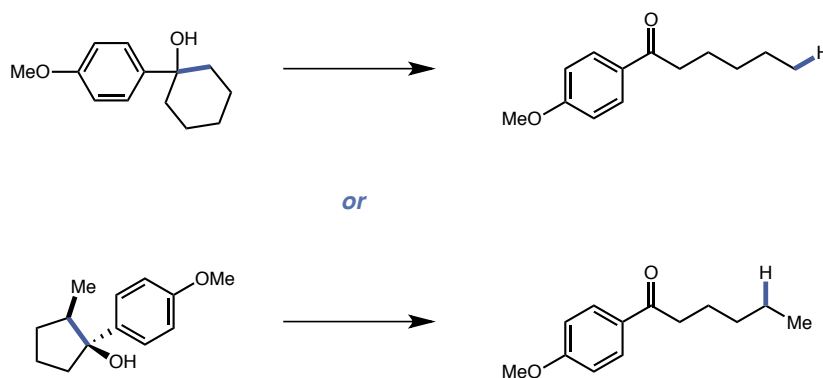

### 1-(4-methoxyphenyl)hexan-1-one

Prepared on 1 mmol scale following the general procedure with 1-(4-methoxyphenyl)cyclohexan-1-ol. The crude material was purified by silica gel column chromatography to afford the titled compound as a pale yellow solid (183 mg, 89%).

Alternatively, prepared on 1 mmol scale following the general procedure with 1-(4-methoxyphenyl)-2-methylcyclopentanol. The crude is purified by silica gel column chromatography to afford the titled compound as a pale yellow oil (201 mg, 97%).

<sup>1</sup>H NMR (500 MHz, C<sub>6</sub>D<sub>6</sub>) δ 7.89 (d, *J* = 8.8 Hz, 2H), 6.66 (d, *J* = 8.9 Hz, 2H), 3.18 (s, 3H), 2.58 (t, *J* = 7.3 Hz, 2H), 1.73 (p, *J* = 7.3 Hz, 2H), 1.26-1.23 (m, 4H), 0.84 (t, *J* = 6.9 Hz, 3H). <sup>13</sup>C NMR (126 MHz, C<sub>6</sub>D<sub>6</sub>) δ 197.2, 163.1, 130.6, 130.2, 113.5, 54.5, 37.9, 31.6, 24.1, 22.6, 13.9.

IR (neat): 2956, 2933, 1676, 1600, 1510, 1254, 1170, 1031, 830 cm<sup>-1</sup>. HRMS (ESI): exact mass calculated for [M+H]<sup>+</sup> (C<sub>13</sub>H<sub>19</sub>O<sub>2</sub>) requires *m/z* 207.13796, found *m/z* 207.13784.

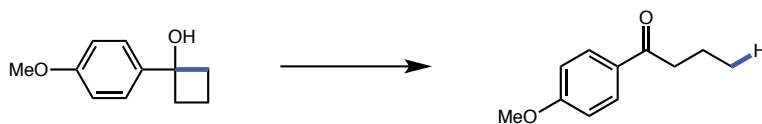

### 1-(4-methoxyphenyl)butan-1-one

Prepared on 1 mmol scale following the general procedure with 1-(4-methoxyphenyl)cyclobutan-1-ol. The crude material was purified by silica gel column chromatography to afford the titled compound as a pale yellow oil (126 mg, 71%). <sup>1</sup>H NMR (500 MHz, C<sub>6</sub>D<sub>6</sub>) δ 7.86 (d, *J* = 8.9 Hz, 2H), 6.65 (d, *J* = 8.9 Hz, 2H), 3.19 (s, 3H), 2.52 (t, *J* = 7.2 Hz, 2H), 1.72 (h, *J* = 7.4 Hz, 2H), 0.87 (t, *J* = 7.4 Hz, 3H). <sup>13</sup>C NMR (126 MHz, C<sub>6</sub>D<sub>6</sub>) δ 197.0, 163.1, 130.6, 130.1, 113.5, 54.5,

39.8, 17.7, 13.7. **IR (neat):** 2963, 1676, 1600, 1258, 1170, 1030, 832  $\text{cm}^{-1}$ . **HRMS (ESI):** exact mass calculated for  $[\text{M}+\text{H}]^+$  ( $\text{C}_{11}\text{H}_{15}\text{O}_2$ ) requires  $m/z$  179.10666, found  $m/z$  179.10692.

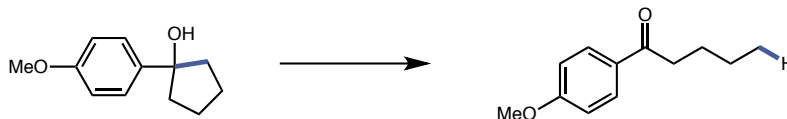

### 1-(4-methoxyphenyl)pentan-1-one

Prepared on 1 mmol scale following the general procedure with 1-(4-methoxyphenyl)cyclopentan-1-ol. The crude material was purified by silica gel column chromatography to afford the titled compound as a pale yellow oil (166 mg, 86%).  **$^1\text{H}$  NMR (500 MHz,  $\text{C}_6\text{D}_6$ )**  $\delta$  7.86 (d,  $J = 8.9$  Hz, 2H), 6.67 (d,  $J = 8.8$  Hz, 2H), 3.24 (s, 3H), 2.58 (t,  $J = 7.4$  Hz, 2H), 1.68 (p,  $J = 7.4$  Hz, 2H), 1.26 (h,  $J = 7.4$  Hz, 2H), 0.84 (t,  $J = 7.4$  Hz, 3H).  **$^{13}\text{C}$  NMR (126 MHz,  $\text{C}_6\text{D}_6$ )**  $\delta$  197.2, 163.1, 130.5, 130.1, 113.5, 54.6, 37.6, 26.5, 22.5, 13.8. **IR (neat):** 2958, 2934, 2872, 1676, 1600, 1255, 1170, 1030, 840  $\text{cm}^{-1}$ . **HRMS (ESI):** exact mass calculated for  $[\text{M}+\text{H}]^+$  ( $\text{C}_{12}\text{H}_{17}\text{O}_2$ ) requires  $m/z$  193.12231, found  $m/z$  193.12267.

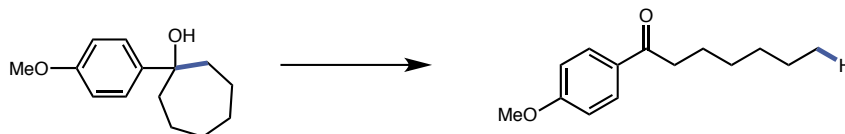

### 1-(4-methoxyphenyl)heptan-1-one

Prepared on 1 mmol scale following the general procedure with 1-(4-methoxyphenyl)cycloheptan-1-ol. The crude material was purified by silica gel column chromatography to afford the titled compound as a pale yellow solid (199 mg, 90%).  **$^1\text{H}$  NMR (500 MHz,  $\text{C}_6\text{D}_6$ )**  $\delta$  7.88 (d,  $J = 8.9$  Hz, 2H), 6.67 (d,  $J = 8.9$  Hz, 2H), 3.24 (s, 3H), 2.61 (t,  $J = 7.3$  Hz, 2H), 1.71 (p,  $J = 7.4$  Hz, 2H), 1.35 – 1.09 (m, 6H), 0.86 (t,  $J = 7.0$  Hz, 3H).  **$^{13}\text{C}$  NMR (126 MHz,  $\text{C}_6\text{D}_6$ )**  $\delta$  197.2, 163.1, 130.6, 130.1, 113.5, 54.6, 37.9, 31.8, 29.1, 24.4, 22.6, 14.0. **IR (neat):** 3004, 2950, 2933, 2858, 1670, 1604, 1509, 1407, 1249, 1179, 1035, 837  $\text{cm}^{-1}$ . **HRMS (ESI):** exact mass calculated for  $[\text{M}+\text{H}]^+$  ( $\text{C}_{14}\text{H}_{21}\text{O}_2$ ) requires  $m/z$  221.15361, found  $m/z$  221.15353.

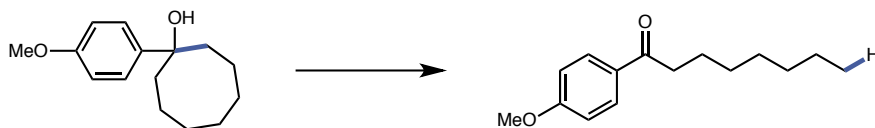

### 1-(4-methoxyphenyl)octan-1-one

Prepared on 1 mmol scale following the general procedure with 1-(4-methoxyphenyl)cyclooctan-1-ol. The crude material was purified by silica gel column chromatography to afford the titled compound as a pale yellow solid (189 mg, 81%).  **$^1\text{H}$  NMR (500 MHz,  $\text{C}_6\text{D}_6$ )**  $\delta$  7.90 (d,  $J = 8.9$  Hz, 2H), 6.66 (d,  $J = 8.8$  Hz, 2H), 3.19 (s, 3H), 2.61 (t,  $J = 7.3$  Hz, 2H), 1.75 (p,  $J = 7.3$  Hz, 2H), 1.42 – 1.09 (m, 8H), 0.88 (t,  $J = 7.0$  Hz, 3H).  **$^{13}\text{C}$  NMR (126 MHz,  $\text{C}_6\text{D}_6$ )**  $\delta$  197.2, 163.1, 130.6, 130.2, 113.5, 54.5, 38.0, 31.8, 29.4, 29.3, 24.5, 22.7, 14.0. **IR (neat):** 2927, 2855, 1676, 1600, 1509, 1256, 1169, 1032, 812  $\text{cm}^{-1}$ . **HRMS (ESI):** exact mass calculated for  $[\text{M}+\text{H}]^+$  ( $\text{C}_{15}\text{H}_{23}\text{O}_2$ ) requires  $m/z$  235.16926, found  $m/z$  235.16923.

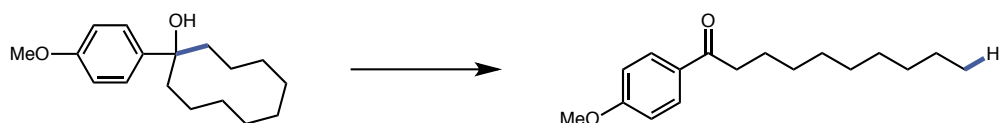

### 1-(4-methoxyphenyl)decan-1-one

Prepared on 1 mmol scale following the general procedure with 1-(4-methoxyphenyl)cyclodecan-1-ol. The crude material was purified by silica gel column chromatography to afford the titled compound as a pale yellow solid (241 mg, 92%). **<sup>1</sup>H NMR (500 MHz, C<sub>6</sub>D<sub>6</sub>)** δ 7.90 (d, *J* = 8.9 Hz, 2H), 6.66 (d, *J* = 8.9 Hz, 2H), 3.19 (s, 3H), 2.63 (t, *J* = 7.3 Hz, 2H), 1.77 (p, *J* = 7.3 Hz, 2H), 1.26 (d, *J* = 9.8 Hz, 12H), 0.91 (t, *J* = 7.0 Hz, 3H). **<sup>13</sup>C NMR (126 MHz, C<sub>6</sub>D<sub>6</sub>)** δ 197.2, 163.1, 130.6, 130.2, 113.5, 54.5, 38.0, 32.0, 29.7, 29.6, 29.5, 29.4, 24.5, 22.8, 14.0. **IR (neat):** 2954, 2915, 2849, 1678, 1605, 1579, 1254, 1178, 1031, 842, 811 cm<sup>-1</sup>. **HRMS (ESI):** exact mass calculated for [M+H]<sup>+</sup> (C<sub>17</sub>H<sub>27</sub>O<sub>2</sub>) requires *m/z* 263.20056, found *m/z* 263.20044.

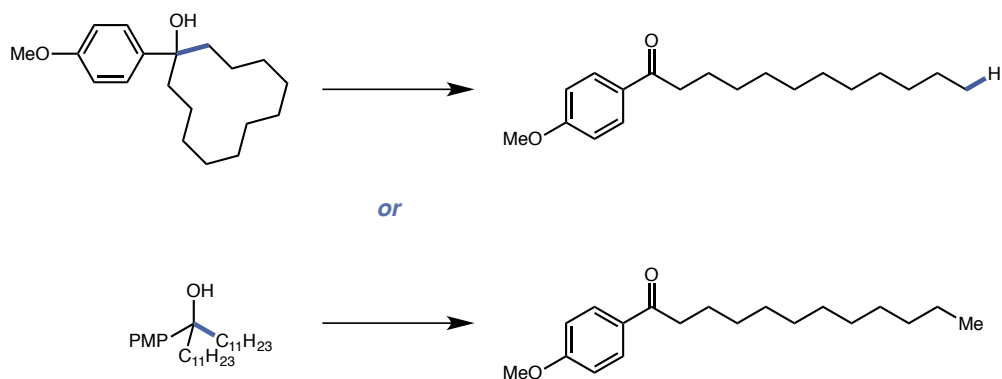

### 1-(4-methoxyphenyl)dodecan-1-one

Prepared on 1 mmol scale following the general procedure with 1-(4-methoxyphenyl)cyclododecan-1-ol. The crude material was purified by silica gel column chromatography to afford the titled compound as a pale yellow solid (245 mg, 85%). Alternatively, prepared on 1 mmol scale following the general procedure with 12-(4-methoxyphenyl)tricosan-12-ol. The crude is purified by silica gel column chromatography to afford the titled compound as a pale yellow powder (243 mg, 84%). **<sup>1</sup>H NMR (500 MHz, C<sub>6</sub>D<sub>6</sub>)** δ 7.91 (d, *J* = 8.7 Hz, 2H), 6.66 (d, *J* = 8.7 Hz, 2H), 3.18 (s, 3H), 2.63 (t, *J* = 7.3 Hz, 2H), 1.78 (p, *J* = 7.2 Hz, 2H), 1.33-1.28 (m, 16H), 0.91 (t, *J* = 6.8 Hz, 3H). **<sup>13</sup>C NMR (126 MHz, C<sub>6</sub>D<sub>6</sub>)** δ 197.2, 163.1, 130.7, 130.2, 113.5, 54.5, 38.0, 32.0, 29.77, 29.75, 29.68, 29.5, 24.5, 22.8, 14.0. **IR (neat):** 2954, 2915, 2849, 1678, 1606, 1580, 1464, 1256, 1179, 1031, 841, 810 cm<sup>-1</sup>. **HRMS (ESI):** exact mass calculated for [M+H]<sup>+</sup> (C<sub>19</sub>H<sub>31</sub>O<sub>2</sub>) requires *m/z* 291.23186, found *m/z* 291.23176.

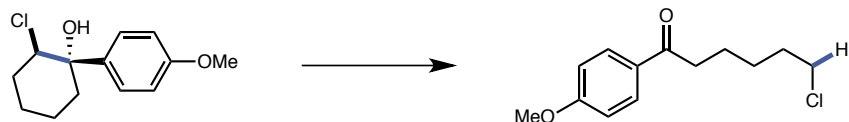

### 6-chloro-1-(4-methoxyphenyl)hexan-1-one

Prepared on 1 mmol scale following the general procedure with 2-chloro-1-(4-methoxyphenyl)cyclohexan-1-ol. The product was purified by silica gel column chromatography to afford the titled compound as a colorless oil (181 mg, 75%). **<sup>1</sup>H NMR (500 MHz, C<sub>6</sub>D<sub>6</sub>)** δ 7.85 (d, *J* = 8.9 Hz, 2H), 6.68 (d, *J* = 8.9 Hz, 2H), 3.24 (s, 3H), 3.10 (t, *J* = 6.7 Hz, 2H), 2.49 (t, *J*



= 7.3 Hz, 2H), 1.54 (dt,  $J = 15.1, 7.3$  Hz, 2H), 1.42 (dq,  $J = 9.1, 6.8$  Hz, 2H), 1.25 – 1.13 (m, 2H).  $^{13}\text{C}$  NMR (126 MHz,  $\text{C}_6\text{D}_6$ )  $\delta$  196.9, 163.2, 130.4, 130.1, 113.6, 54.6, 44.5, 37.6, 32.4, 26.5, 23.4. IR (neat): 2938, 2865, 1674, 1599, 1575, 1509, 1418, 1309, 1256, 1169, 1029, 970, 834, 811, 718  $\text{cm}^{-1}$ . HRMS (ESI): exact mass calculated for  $[\text{M}+\text{H}]^+$  ( $\text{C}_{13}\text{H}_{18}\text{ClO}_2$ ) requires  $m/z$  241.09899, found  $m/z$  241.09935.

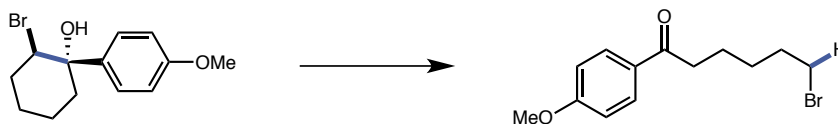

#### 6-bromo-1-(4-methoxyphenyl)hexan-1-one

Prepared on 1 mmol scale following the general procedure with 2-bromo-1-(4-methoxyphenyl)cyclohexan-1-ol. The product was purified by silica gel column chromatography to afford the titled compound as a colorless oil (179 mg, 63%).  $^1\text{H}$  NMR (500 MHz,  $\text{C}_6\text{D}_6$ )  $\delta$  7.85 (d,  $J = 8.9$  Hz, 2H), 6.68 (d,  $J = 8.9$  Hz, 2H), 3.23 (s, 3H), 2.94 (t,  $J = 6.8$  Hz, 2H), 2.47 (t,  $J = 7.2$  Hz, 2H), 1.58 – 1.44 (m, 4H), 1.17 (tdd,  $J = 9.9, 8.4, 4.7$  Hz, 2H).  $^{13}\text{C}$  NMR (126 MHz,  $\text{C}_6\text{D}_6$ )  $\delta$  196.8, 163.2, 130.4, 130.1, 113.6, 54.6, 37.5, 33.3, 32.6, 27.7, 23.3. IR (neat): 2936, 2839, 1673, 1598, 1575, 1509, 1418, 1362, 1252, 1217, 1168, 1028, 832, 810, 734  $\text{cm}^{-1}$ . HRMS (ESI): exact mass calculated for  $[\text{M}+\text{H}]^+$  ( $\text{C}_{13}\text{H}_{18}\text{BrO}_2$ ) requires  $m/z$  285.04847, found  $m/z$  285.04882.

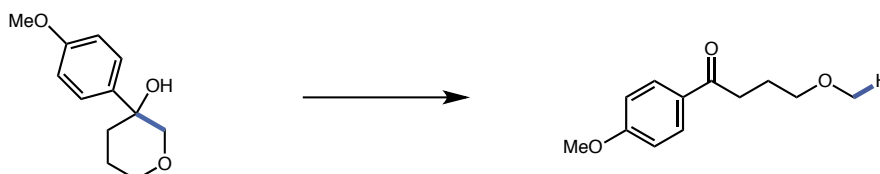

#### 4-methoxy-1-(4-methoxyphenyl)butan-1-one

Prepared on 1 mmol scale following the general procedure with 3-(4-methoxyphenyl)tetrahydro-2H-pyran-3-ol. The crude material was first washed with 1.0 M HCl and then purified by alumina column chromatography to afford the titled compound as a brown solid (203 mg, 98%).  $^1\text{H}$  NMR (500 MHz,  $\text{C}_6\text{D}_6$ )  $\delta$  7.88 (d,  $J = 8.8$  Hz, 2H), 6.64 (d,  $J = 8.8$  Hz, 2H), 3.24 (t,  $J = 6.1$  Hz, 2H), 3.20 (s, 3H), 3.08 (s, 3H), 2.79 (t,  $J = 7.2$  Hz, 2H), 2.02 (p,  $J = 6.6$  Hz, 2H).  $^{13}\text{C}$  NMR (126 MHz,  $\text{C}_6\text{D}_6$ )  $\delta$  197.1, 163.2, 130.4, 130.1, 113.5, 71.6, 57.9, 54.6, 34.5, 24.4. IR (neat): 2929, 1677, 1601, 1577, 1510, 1257, 1171, 1117, 1030, 836  $\text{cm}^{-1}$ . HRMS (ESI): exact mass calculated for  $[\text{M}+\text{H}]^+$  ( $\text{C}_{12}\text{H}_{17}\text{O}_3$ ) requires  $m/z$  209.11722, found  $m/z$  209.11708.

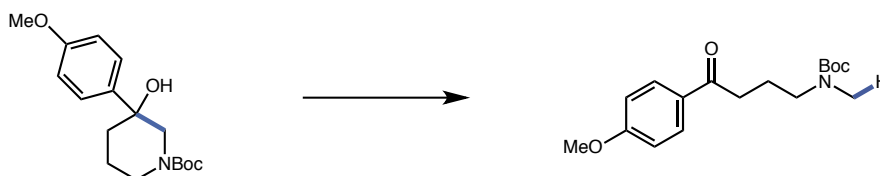

#### tert-butyl (4-(4-methoxyphenyl)-4-oxobutyl)(methyl)carbamate

Prepared on 1 mmol scale following the general procedure with *tert*-butyl 3-(4-methoxyphenyl)piperidine-1-carboxylate. The crude material was purified by silica gel column chromatography to afford the titled compound as a colorless oil (269 mg, 88%).  $^1\text{H}$  NMR (500 MHz,  $\text{C}_6\text{D}_6$ , 50 °C)  $\delta$  7.87 (d,  $J = 8.9$  Hz, 2H), 6.66 (d,  $J = 8.8$  Hz, 2H), 3.24 (s, 3H), 3.21 – 3.15 (m, 2H), 2.67 (s, 3H), 2.62 (t,  $J = 6.5$  Hz, 2H), 1.92 – 1.85 (m, 2H), 1.42 (s, 9H).  $^{13}\text{C}$  NMR (75

**MHz, C<sub>6</sub>D<sub>6</sub>, 50 °C**)  $\delta$  196.9, 163.7, 155.8, 131.0, 130.5, 114.0, 78.8, 55.0, 48.4, 35.1, 34.0, 28.6, 22.7. **IR (neat):** 2972, 1681, 1599, 1392, 1364, 1256, 1163, 1028, 983, 830, 770 cm<sup>-1</sup>. **HRMS (ESI):** exact mass calculated for [M-Boc+2H]<sup>+</sup> (C<sub>12</sub>H<sub>18</sub>NO<sub>2</sub>) requires  $m/z$  208.13321, found 208.13327.

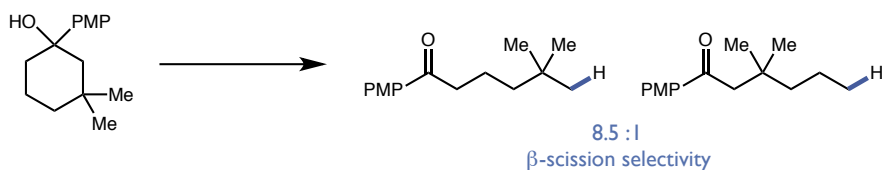

Prepared on 1 mmol scale following the general procedure with 1-(4-methoxyphenyl)-3,3-dimethylcyclohexan-1-ol. The crude material was purified by silica gel column chromatography to afford an 8.5:1 mixture of regioisomers as a pale yellow oil (220 mg, 94%). The isomers were separated by preparative SFC on a Chiralpak AD-H column (3 × 25 cm, conditions: 60 mL/min, 30% methanol, 220 nm, 10 mg/mL, 1 mL/injection) for final characterization.

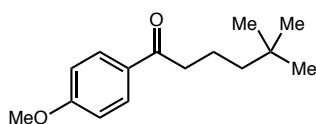

**1-(4-methoxyphenyl)-5,5-dimethylhexan-1-one (major isomer)**

**<sup>1</sup>H NMR (500 MHz, C<sub>6</sub>D<sub>6</sub>)**  $\delta$  7.91 (d,  $J$  = 8.9 Hz, 2H), 6.67 (d,  $J$  = 8.9 Hz, 2H), 3.20 (s, 3H), 2.57 (t,  $J$  = 7.3 Hz, 2H), 1.85 – 1.62 (m, 2H), 1.27 – 1.07 (m, 2H), 0.88 (s, 9H). **<sup>13</sup>C NMR (126 MHz, C<sub>6</sub>D<sub>6</sub>)**  $\delta$  197.1, 163.1, 130.7, 130.1, 113.5, 54.5, 43.8, 38.7, 30.1, 29.1, 19.5. **IR (neat):** 3000, 2954, 2901, 2865, 1668, 1601, 1577, 1420, 1256, 1182, 1033, 978, 826, 819 cm<sup>-1</sup>. **HRMS (ESI)** exact mass calculated for [M+H]<sup>+</sup> (C<sub>15</sub>H<sub>23</sub>O<sub>2</sub>) requires  $m/z$  235.16926, found  $m/z$  235.16884.

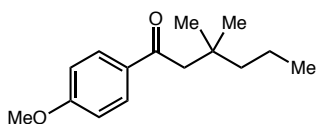

**1-(4-methoxyphenyl)-3,3-dimethylhexan-1-one (minor isomer)**

**<sup>1</sup>H NMR (500 MHz, C<sub>6</sub>D<sub>6</sub>)**  $\delta$  7.90 (d,  $J$  = 8.9 Hz, 2H), 6.65 (d,  $J$  = 8.9 Hz, 2H), 3.18 (s, 3H), 2.62 (s, 2H), 1.43 – 1.35 (m, 2H), 1.29 – 1.16 (m, 2H), 1.06 (s, 6H), 0.87 (t,  $J$  = 7.2 Hz, 3H). **<sup>13</sup>C NMR (126 MHz, C<sub>6</sub>D<sub>6</sub>)**  $\delta$  197.2, 163.0, 132.1, 130.3, 113.4, 54.5, 47.3, 45.0, 33.6, 27.6, 17.4, 14.8. **IR (neat):** 2957, 2871, 1667, 1600, 1509, 1463, 1257, 1170, 1034, 1019, 844 cm<sup>-1</sup>. **HRMS (ESI):** exact mass calculated for [M+H]<sup>+</sup> (C<sub>15</sub>H<sub>23</sub>O<sub>2</sub>) requires  $m/z$  235.16926, found  $m/z$  235.16921.

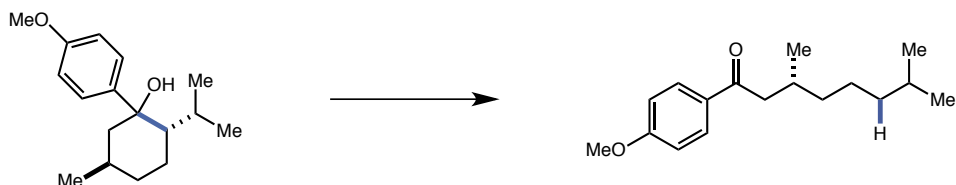

**(R)-1-(4-methoxyphenyl)-3,7-dimethyloctan-1-one**

Prepared on 1 mmol scale following the general procedure with (2*S*,5*R*)-2-isopropyl-1-(4-

methoxyphenyl)-5-methylcyclohexanol. The crude material was purified by silica gel column chromatography to afford the titled compound as a colorless oil (235 mg, 90%). **<sup>1</sup>H NMR (500 MHz, CDCl<sub>3</sub>)** δ 7.94 (d, *J* = 8.9 Hz, 2H), 6.93 (d, *J* = 8.9 Hz, 2H), 3.87 (s, 3H), 2.89 (dd, *J* = 15.4, 5.7 Hz, 1H), 2.69 (dd, *J* = 15.4, 8.0 Hz, 1H), 2.21 – 2.08 (m, 1H), 1.52 (dp, *J* = 13.2, 6.8 Hz, 1H), 1.38 – 1.32 (m, 2H), 1.31 – 1.25 (m, 1H), 1.24 – 1.19 (m, 1H), 1.19 – 1.10 (m, 2H), 0.94 (d, *J* = 6.7 Hz, 3H), 0.86 (dd, *J* = 6.6, 1.7 Hz, 6H). **<sup>13</sup>C NMR (126 MHz, CDCl<sub>3</sub>)** δ 199.2, 163.3, 130.6, 130.4, 113.6, 55.5, 45.7, 39.1, 37.5, 30.1, 28.0, 24.8, 22.7, 22.6, 20.1. **IR (neat):** 2954, 2926, 1673, 1599, 1576, 1509, 1257, 1168, 1031, 828, 808 cm<sup>-1</sup>; **HRMS (ESI):** exact mass calculated for [M+H]<sup>+</sup> (C<sub>17</sub>H<sub>27</sub>O<sub>2</sub>) requires *m/z* 263.20056, found *m/z* 263.20097.

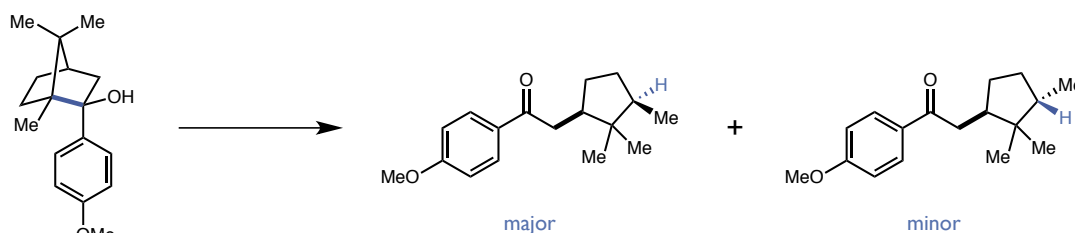

Prepared on 1 mmol scale following the general procedure with (1*R*,2*S*,4*R*)-2-(4-methoxyphenyl)-1,7,7-trimethylbicyclo[2.2.1]heptan-2-ol. The crude material was purified by silica gel column chromatography to afford a 6:1 mixture of diastereomers as a colorless oil (238 mg, 91%). The diastereomers were separated via preparative SFC on a Chiralpak AD-H column (2 × 25 cm, conditions: 70 mL/min, 15% methanol, 220 nm, 7 mg/mL, 1 mL/injection) and their stereochemistries were determined by NOESY analysis (see product NMR section).

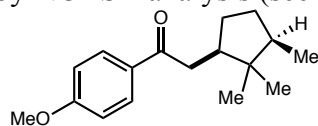

**1-(4-methoxyphenyl)-2-((1*R*,3*R*)-2,2,3-trimethylcyclopentyl)ethan-1-one (major isomer)**

**<sup>1</sup>H NMR (500 MHz, CDCl<sub>3</sub>)** δ 7.94 (d, *J* = 9.0 Hz, 2H), 6.93 (d, *J* = 8.9 Hz, 2H), 3.87 (s, 3H), 2.99 (dd, *J* = 15.1, 3.2 Hz, 1H), 2.66 (dd, *J* = 15.1, 10.8 Hz, 1H), 2.06 – 1.97 (m, 1H), 1.89 – 1.81 (m, 1H), 1.79 – 1.71 (m, 1H), 1.58 – 1.51 (m, 1H), 1.27 – 1.11 (m, 2H), 0.94 (s, 3H), 0.85 (d, *J* = 6.9 Hz, 3H), 0.61 (s, 3H). **<sup>13</sup>C NMR (126 MHz, CDCl<sub>3</sub>)** δ 199.5, 163.3, 130.4, 127.3, 113.6, 55.5, 46.8, 44.6, 42.5, 39.6, 30.1, 28.3, 25.5, 14.8, 14.0. **IR (neat):** 2952, 2869, 1673, 1598, 1575, 1509, 1313, 1210, 1166, 1029, 991, 824, 807 cm<sup>-1</sup>. **HRMS (ESI):** exact mass calculated for [M+H]<sup>+</sup> (C<sub>17</sub>H<sub>25</sub>O<sub>2</sub>) requires *m/z* 261.18491, found *m/z* 261.18505.

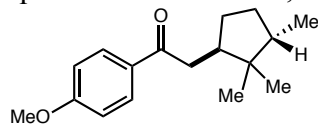

**1-(4-methoxyphenyl)-2-((1*R*,3*S*)-2,2,3-trimethylcyclopentyl)ethan-1-one (minor isomer)**

**<sup>1</sup>H NMR (500 MHz, CDCl<sub>3</sub>)** δ 7.94 (d, *J* = 8.9 Hz, 2H), 6.93 (d, *J* = 8.8 Hz, 2H), 3.87 (s, 3H), 2.97 (dd, *J* = 15.2, 4.0 Hz, 1H), 2.68 (dd, *J* = 15.3, 10.5 Hz, 1H), 2.18 (dtd, *J* = 10.2, 7.9, 3.9 Hz, 1H), 1.93 – 1.87 (m, 1H), 1.87 – 1.82 (m, 1H), 1.66 (h, *J* = 7.0 Hz, 1H), 1.27 – 1.13 (m, 2H), 0.89 (s, 3H), 0.87 (s, 3H), 0.86 (d, 3H). **<sup>13</sup>C NMR (126 MHz, CDCl<sub>3</sub>)** δ 199.6, 163.2, 130.5, 130.4, 113.7, 55.5, 44.4, 43.5, 42.3, 40.1, 31.4, 29.5, 24.3, 23.6, 16.4. **IR (neat):** 2952, 2869, 1673, 1598, 1575, 1509, 1313, 1210, 1166, 1029, 991, 824, 807 cm<sup>-1</sup>. **HRMS (ESI):** exact mass calculated for [M+H]<sup>+</sup> (C<sub>17</sub>H<sub>25</sub>O<sub>2</sub>) requires *m/z* 261.18491, found *m/z* 261.18505.

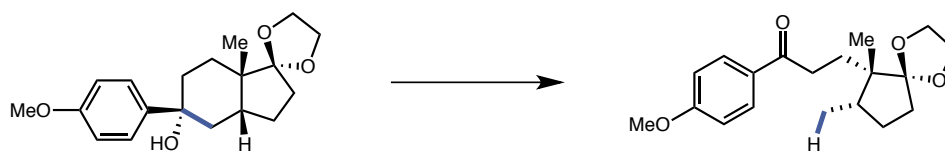

### 3-((6*S*,7*S*)-6,7-dimethyl-1,4-dioxaspiro[4.4]nonan-6-yl)-1-(4-methoxyphenyl)propan-1-one

Prepared on 1 mmol scale following the general procedure with (3*a'**R*,7*a'**S*)-5'-(4-methoxyphenyl)-7*a'*-methyloctahydrospiro[[1,3]dioxolane-2,1'-inden]-5'-ol. The crude material was purified by silica gel column chromatography to afford the titled compound as a colorless oil (195 mg, 61%). <sup>1</sup>H NMR (500 MHz, C<sub>6</sub>D<sub>6</sub>) δ 8.09 (d, *J* = 8.8 Hz, 2H), 6.68 (d, *J* = 8.9 Hz, 2H), 3.50 – 3.39 (m, 4H), 3.34 (ddd, *J* = 16.2, 11.1, 5.1 Hz, 1H), 3.18 (s, 3H), 2.88 (ddd, *J* = 16.2, 11.0, 5.2 Hz, 1H), 2.08 – 2.02 (m, 1H), 2.02 – 1.94 (m, 2H), 1.89 – 1.84 (m, 1H), 1.82 – 1.74 (m, 2H), 1.28 – 1.20 (m, 1H), 1.05 (s, 3H), 0.96 (d, *J* = 7.1 Hz, 3H). <sup>13</sup>C NMR (126 MHz, C<sub>6</sub>D<sub>6</sub>) δ 198.3, 163.0, 130.8, 130.3, 120.1, 113.6, 64.7, 63.3, 54.5, 47.0, 41.8, 34.0, 32.8, 27.4, 25.8, 18.9, 15.5. IR (neat): 2958, 2876, 1673, 1599, 1575, 1509, 1306, 1255, 1169, 1028, 986, 839 cm<sup>-1</sup>. HRMS (ESI): exact mass calculated for [M+H]<sup>+</sup> (C<sub>19</sub>H<sub>27</sub>O<sub>4</sub>) requires *m/z* 319.19039, found *m/z* 319.19003.

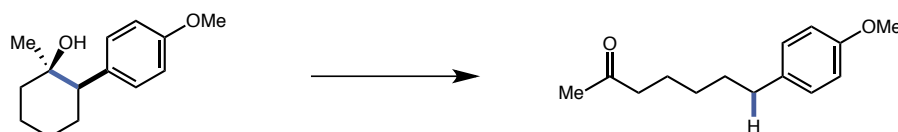

### 7-(4-methoxyphenyl)heptan-2-one

Prepared on 1 mmol scale following the general procedure with 2-(4-methoxyphenyl)-1-methylcyclohexanol. The crude material was purified by silica gel column chromatography to afford the titled compound as a colorless oil (200 mg, 91%). <sup>1</sup>H NMR (500 MHz, CDCl<sub>3</sub>) δ 7.08 (d, *J* = 8.6 Hz, 2H), 6.82 (d, *J* = 8.6 Hz, 2H), 3.78 (s, 3H), 2.58 – 2.49 (m, 2H), 2.41 (t, *J* = 7.5 Hz, 2H), 2.12 (s, 3H), 1.64 – 1.54 (m, 4H), 1.35 – 1.27 (m, 2H). <sup>13</sup>C NMR (126 MHz, CDCl<sub>3</sub>) δ 209.3, 157.6, 134.6, 129.2, 113.7, 55.3, 43.7, 34.8, 31.5, 29.9, 28.7, 23.7. IR (neat): 2930, 2855, 1712, 1611, 1510, 1242, 1175, 1034, 822 cm<sup>-1</sup>. HRMS (EI): exact mass calculated for [M]<sup>+</sup> (C<sub>14</sub>H<sub>20</sub>O<sub>2</sub>) requires *m/z* 220.1458, found *m/z* 220.1454.

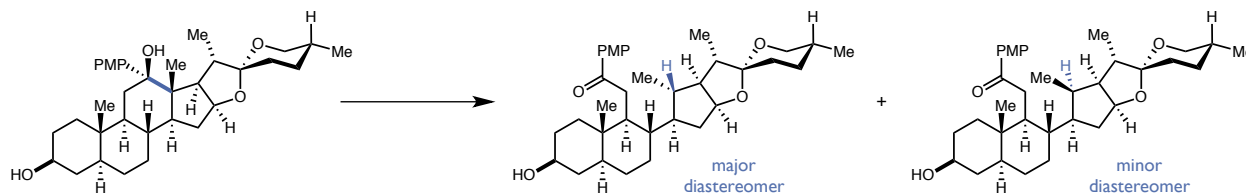

Prepared on 0.5 mmol scale following the general procedure with (2*aS*,4*S*,5'*R*,6*aS*,6*bS*,8*R*,8*bR*,9*S*,10*R*,11*aS*,12*aS*,12*bR*)-8-(4-methoxyphenyl)-5',6*a*,8*a*,9-tetramethyldocosahydrospiro[naphtho[2',1':4,5]indeno[2,1-*b*]furan-10,2'-pyran]-4,8-diol (269 mg). The crude material was purified by silica gel column chromatography to afford an 8:1 mixture of diastereomers as a colorless oil (220 mg, 81%). The diastereomers were separated via preparative SFC on a Chiralpak AD-H column (3 × 25 cm, conditions: 60 mL/min, 30% isopropanol, 220 nm, 7 mg/mL, 1 mL/injection) and their stereochemistries were determined by NOESY analysis (see product NMR section).

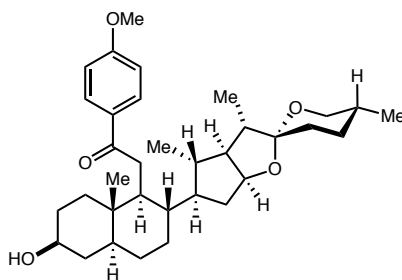

**2-((1S,2S,4aS,6S,8aS)-6-hydroxy-8a-methyl-2-((2R,3S,3aS,4S,5R,5'R,6aS)-3,4,5'-trimethyldecahydrospiro[cyclopenta[b]furan-2,2'-pyran]-5-yl)decahydronaphthalen-1-yl)-1-(4-methoxyphenyl)ethan-1-one (major isomer)**

$^1\text{H NMR}$  (500 MHz,  $\text{C}_6\text{D}_6$ )  $\delta$  7.96 (d,  $J = 8.9$  Hz, 2H), 6.67 (d,  $J = 8.8$  Hz, 2H), 4.39 (dt,  $J = 8.8, 7.1$  Hz, 1H), 3.57 – 3.41 (m, 2H), 3.34 (tt,  $J = 10.7, 4.9$  Hz, 1H), 3.16 (s, 3H), 2.74 (dd,  $J = 18.1, 5.9$  Hz, 1H), 2.60 (dd,  $J = 18.0, 3.0$  Hz, 1H), 2.38 (ddd,  $J = 12.5, 7.1, 5.5$  Hz, 1H), 2.16 (ddd,  $J = 11.3, 5.9, 3.0$  Hz, 1H), 1.75 – 1.65 (m, 3H), 1.65 – 1.39 (m, 11H), 1.39 – 1.31 (m, 1H), 1.31 – 1.24 (m, 2H), 1.24 – 1.14 (m, 4H), 1.11 (d,  $J = 6.8$  Hz, 3H), 1.00 – 0.89 (m, 2H), 0.87 (d,  $J = 6.5$  Hz, 3H), 0.69 (s, 3H), 0.64 (d,  $J = 6.3$  Hz, 3H).  $^{13}\text{C NMR}$  (126 MHz,  $\text{C}_6\text{D}_6$ )  $\delta$  196.3, 163.2, 130.6, 130.0, 113.7, 108.3, 80.4, 70.3, 66.6, 57.6, 54.5, 50.4, 50.1, 45.3, 43.8, 42.6, 38.4, 37.7, 37.1, 36.8, 36.6, 32.7, 31.9, 31.4, 30.5, 28.9, 28.4, 25.6, 17.9, 17.0, 13.7, 12.1. **IR (neat):** 3405, 2925, 2862, 1676, 1599, 1575, 1510, 1456, 1255, 1169, 1032, 1052, 978, 828, 812, 755  $\text{cm}^{-1}$ . **HRMS (ESI):** exact mass calculated for  $[\text{M}+\text{H}]^+$  ( $\text{C}_{34}\text{H}_{51}\text{O}_5$ ) requires  $m/z$  539.37310, found  $m/z$  539.37341.

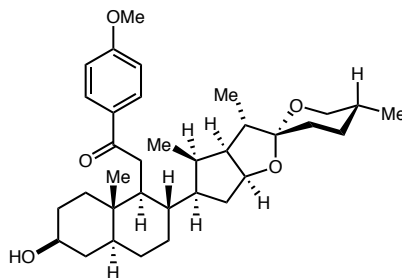

**2-((1S,2S,4aS,6S,8aS)-6-hydroxy-8a-methyl-2-((2R,3S,3aS,4R,5R,5'R,6aS)-3,4,5'-trimethyldecahydrospiro[cyclopenta[b]furan-2,2'-pyran]-5-yl)decahydronaphthalen-1-yl)-1-(4-methoxyphenyl)ethan-1-one (minor isomer)**

$^1\text{H NMR}$  (800 MHz,  $\text{C}_6\text{D}_6$ )  $\delta$  7.97 (d,  $J = 8.8$  Hz, 2H), 6.67 (d,  $J = 8.8$  Hz, 2H), 4.43 – 4.37 (m, 1H), 3.51 – 3.44 (m, 2H), 3.41 – 3.36 (m, 1H), 3.18 (s, 3H), 2.79 (dd,  $J = 18.5, 2.8$  Hz, 1H), 2.71 (dd,  $J = 18.6, 5.7$  Hz, 1H), 2.26 – 2.20 (m, 2H), 2.17 (dq,  $J = 11.6, 5.7$  Hz, 1H), 1.88 (h,  $J = 7.5$  Hz, 1H), 1.84 – 1.76 (m, 2H), 1.71 – 1.60 (m, 6H), 1.57 – 1.43 (m, 4H), 1.34 – 1.26 (m, 2H), 1.24 – 1.11 (m, 5H), 1.04 (td,  $J = 14.2, 13.7, 3.8$  Hz, 1H), 1.01 – 0.95 (m, 4H), 0.83 (dd,  $J = 7.4, 2.2$  Hz, 3H), 0.72 (s, 3H), 0.63 (d,  $J = 6.3$  Hz, 3H).  $^{13}\text{C NMR}$  (126 MHz,  $\text{C}_6\text{D}_6$ )  $\delta$  197.2, 163.6, 130.9, 130.3, 114.1, 108.9, 81.0, 70.8, 67.1, 54.9, 53.2, 47.2, 46.4, 44.2, 43.2, 38.7, 38.6, 38.3, 37.6, 37.5, 37.4, 31.9, 31.71, 31.69, 31.5, 30.8, 29.3, 29.0, 17.4, 14.2, 12.9, 12.6. **IR (neat):** 3413, 2926, 2860, 1677, 1599, 1575, 1455, 1258, 1243, 1169, 1057, 978, 899, 812  $\text{cm}^{-1}$ . **HRMS (ESI):** exact mass calculated for  $[\text{M}+\text{H}]^+$  ( $\text{C}_{34}\text{H}_{51}\text{O}_5$ ) requires  $m/z$  539.37310, found  $m/z$  539.37331.

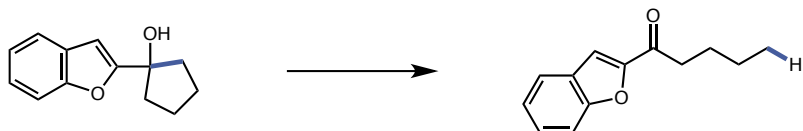

### 1-(benzofuran-2-yl)pentan-1-one

Prepared on 1 mmol scale following the general procedure with 1-(benzofuran-2-yl)cyclopentanol. The crude material was purified by silica gel column chromatography to afford the titled compound as a white solid (169 mg, 84%).  $^1\text{H NMR}$  (500 MHz,  $\text{C}_6\text{D}_6$ )  $\delta$  7.28 – 7.26 (m, 2H), 7.08 – 7.04 (m, 2H), 6.99 – 6.96 (m, 1H), 2.61 (t,  $J = 7.3$  Hz, 2H), 1.65 (p,  $J = 7.4$  Hz, 2H), 1.23 (h,  $J = 7.4$  Hz, 2H), 0.81 (t,  $J = 7.4$  Hz, 3H).  $^{13}\text{C NMR}$  (126 MHz,  $\text{C}_6\text{D}_6$ )  $\delta$  190.1, 155.4, 153.3, 128.2, 127.3, 123.5, 123.0, 112.1, 111.2, 38.4, 25.8, 22.3, 13.7. IR (neat): 2959, 2932, 2872, 1682, 1556, 1280, 1159, 1141, 1027, 755  $\text{cm}^{-1}$ . HRMS (ESI): exact mass calculated for  $[\text{M}+\text{H}]^+$  ( $\text{C}_{13}\text{H}_{15}\text{O}_2$ ) requires  $m/z$  203.10666, found  $m/z$  203.10638.

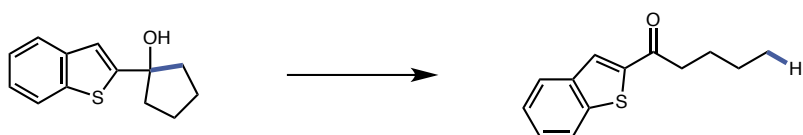

### 1-(benzo[*b*]thiophen-2-yl)pentan-1-one

Prepared on 1 mmol scale following the general procedure with 1-(benzo[*b*]thiophen-2-yl)cyclopentanol. The crude material was purified by silica gel column chromatography to afford the titled compound as an off-white powder (188 mg, 86%).  $^1\text{H NMR}$  (500 MHz,  $\text{C}_6\text{D}_6$ )  $\delta$  7.51 (d,  $J = 8.0$  Hz, 1H), 7.37 – 7.35 (m, 2H), 7.10 – 7.07 (m, 1H), 7.03 – 7.00 (m, 1H), 2.52 (t,  $J = 7.3$  Hz, 2H), 1.64 (p,  $J = 7.4$  Hz, 2H), 1.23 (h,  $J = 7.4$  Hz, 2H), 0.82 (t,  $J = 7.4$  Hz, 3H).  $^{13}\text{C NMR}$  (126 MHz,  $\text{C}_6\text{D}_6$ )  $\delta$  193.3, 144.5, 142.4, 139.3, 128.1, 126.9, 125.5, 124.6, 122.9, 38.5, 26.4, 22.3, 13.7. IR (neat): 2961, 2951, 2929, 2871, 1658, 1519, 1407, 1177, 744, 727  $\text{cm}^{-1}$ . HRMS (ESI): exact mass calculated for  $[\text{M}+\text{H}]^+$  ( $\text{C}_{13}\text{H}_{15}\text{OS}$ ) requires  $m/z$  219.08381, found  $m/z$  219.08372.

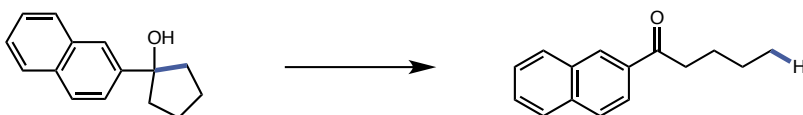

### 1-(naphthalen-2-yl)pentan-1-one

Prepared on 1 mmol scale following the general procedure with 1-(naphthalen-2-yl)cyclopentanol. The crude material was purified by silica gel column chromatography to afford the titled compound as a yellow solid (88 mg, 41%). Spectra are consistent with reported literature values.<sup>10</sup>

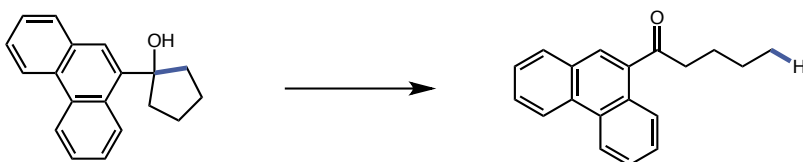

### 1-(phenanthren-9-yl)pentan-1-one

Prepared on 1 mmol scale following the general procedure with 1-(phenanthren-9-yl)cyclopentanol. The crude material was purified by silica gel column chromatography to afford the titled compound as a yellow solid (215 mg, 82%).  $^1\text{H NMR}$  (500 MHz,  $\text{C}_6\text{D}_6$ )  $\delta$  8.92 (d,  $J =$

8.2 Hz, 1H), 8.43 (d,  $J = 8.2$  Hz, 1H), 8.36 (d,  $J = 8.3$  Hz, 1H), 7.73 (s, 1H), 7.58 (d,  $J = 7.8$  Hz, 1H), 7.45 – 7.32 (m, 4H), 2.71 (t,  $J = 7.3$  Hz, 2H), 1.73 (p,  $J = 7.5$  Hz, 2H), 1.29 (h,  $J = 7.4$  Hz, 2H), 0.85 (t,  $J = 7.4$  Hz, 3H).  $^{13}\text{C}$  NMR (126 MHz,  $\text{C}_6\text{D}_6$ )  $\delta$  203.2, 135.9, 131.8, 130.9, 130.2, 129.5, 128.9, 128.7, 128.2, 127.4, 127.0, 126.9, 126.7, 122.8, 122.7, 41.6, 26.6, 22.4, 13.8. IR (neat): 2957, 2929, 2871, 1678, 1448, 1249, 1130, 1085, 747, 725  $\text{cm}^{-1}$ . HRMS (ESI): exact mass calculated for  $[\text{M}+\text{H}]^+$  ( $\text{C}_{19}\text{H}_{19}\text{O}$ ) requires  $m/z$  263.14304, found  $m/z$  263.14316.

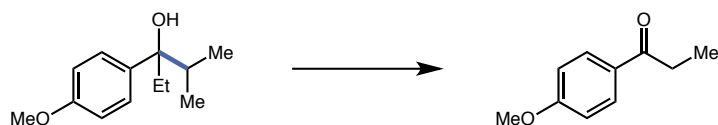

### 1-(4-methoxyphenyl)propan-1-one

Prepared on 1 mmol scale following the general procedure with 3-(4-methoxyphenyl)-2-methylpentan-3-ol. The crude material was purified by silica gel column chromatography to afford the titled compound as a yellow oil (152 mg, 93%). Spectra are consistent with reported literature values.<sup>11</sup>

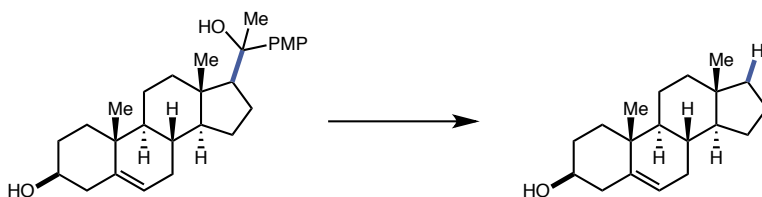

### (3*S*,8*S*,9*S*,10*R*,13*S*,14*S*)-10,13-dimethyl-2,3,4,7,8,9,10,11,12,13,14,15,16,17-tetradecahydro-1*H*-cyclopenta[*a*]phenanthren-3-ol

Prepared on 0.5 mmol scale following the general procedure from (3*S*,9*S*,10*R*,13*S*,14*S*,17*S*)-17-(1-hydroxy-1-(4-methoxyphenyl)ethyl)-10,13-dimethyl-2,3,4,7,8,9,10,11,12,13,14,15,16,17-tetradecahydro-1*H*-cyclopenta[*a*]phenanthren-3-ol. The product was purified by silica gel column chromatography to afford the titled compound as a colorless oil (98 mg, 72%).  $^1\text{H}$  NMR (500 MHz,  $\text{C}_6\text{D}_6$ )  $\delta$  5.34 (dt,  $J = 4.8, 2.1$  Hz, 1H), 3.39 (tt,  $J = 11.1, 4.8$  Hz, 1H), 2.24 (dtdd,  $J = 16.0, 13.3, 5.3, 2.3$  Hz, 2H), 1.95 (dtd,  $J = 17.5, 5.3, 2.6$  Hz, 1H), 1.76 – 1.70 (m, 1H), 1.69 – 1.49 (m, 6H), 1.48 – 1.30 (m, 5H), 1.12 (dddd,  $J = 17.2, 11.9, 7.6, 4.3$  Hz, 3H), 1.00 – 0.86 (m, 3H), 0.92 (s, 3H), 0.84 – 0.74 (m, 1H), 0.68 (s, 3H).  $^{13}\text{C}$  NMR (126 MHz,  $\text{C}_6\text{D}_6$ )  $\delta$  140.9, 121.3, 71.3, 54.7, 50.4, 42.6, 40.5, 40.3, 38.7, 37.4, 36.6, 32.2, 32.1, 31.8, 25.6, 21.2, 20.6, 19.2, 17.1. IR (neat): 3242, 2930, 2858, 1610, 1453, 1376, 1232, 1110, 1019, 954, 812, 795, 739, 677  $\text{cm}^{-1}$ . HRMS (ESI): exact mass calculated for  $[\text{M}-\text{H}_2\text{O}+\text{H}]^+$  ( $\text{C}_{19}\text{H}_{29}$ ) requires  $m/z$  257.22638, found  $m/z$  257.22619.

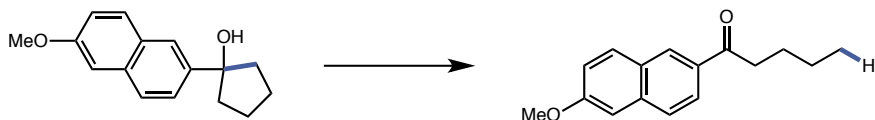

### 1-(6-methoxynaphthalen-2-yl)pentan-1-one

Prepared on 1 mmol scale in a single run, following the general procedure with 1-(6-methoxynaphthalen-2-yl)cyclopentanol. The crude material was purified by silica gel column chromatography to afford the titled compound as a yellow solid (18 mg, 7%).  $^1\text{H}$  NMR (500 MHz,  $\text{C}_6\text{D}_6$ )  $\delta$  8.27 (s, 1H), 8.20 (d,  $J = 8.6$  Hz, 1H), 7.51 (dd,  $J = 19.3, 8.7$  Hz, 2H), 7.12 (d,  $J = 2.5$  Hz, 1H), 6.83 (d,  $J = 2.6$  Hz, 1H), 3.33 (s, 3H), 2.72 (t,  $J = 7.3$  Hz, 2H), 1.76 (p,  $J = 7.4$  Hz, 2H), 1.31 (h,  $J = 7.4$  Hz, 2H), 0.88 (t,  $J = 7.4$  Hz, 3H).  $^{13}\text{C}$  NMR (126 MHz,  $\text{C}_6\text{D}_6$ )  $\delta$  198.2,

159.6, 137.2, 133.0, 131.0, 129.4, 128.1, 127.0, 124.9, 119.6, 105.7, 54.5, 37.8, 26.5, 22.5, 13.9.  
**IR (neat):** 2955, 2936, 2871, 1675, 1623, 1603, 1482, 1266, 1164, 1030, 852, 811  $\text{cm}^{-1}$ . **HRMS (ESI):** exact mass calculated for  $[\text{M}+\text{H}]^+$  ( $\text{C}_{16}\text{H}_{19}\text{O}_2$ ) requires  $m/z$  243.13796, found  $m/z$  243.13762.



**Protocol for forming distally fluorinated ketones  
via PCET-mediated ring-opening of cyclic alcohols**

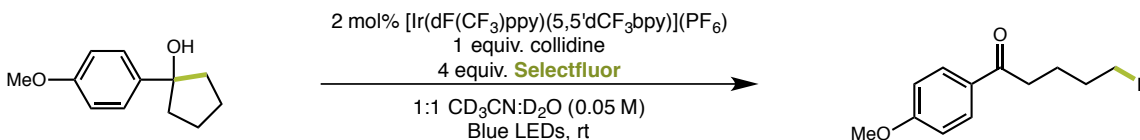

**5-fluoro-1-(4-methoxyphenyl)pentan-1-one**

A screw cap culture tube (16 × 125 mm) outfitted with a PTFE/silicone septa was charged with 1-(4-methoxyphenyl)cyclopentan-1-ol (0.5 mmol, 1 equiv, 96 mg), redistilled collidine (0.5 mmol, 1 equiv, 66 μL), [Ir(dF(CF<sub>3</sub>)ppy)<sub>2</sub>(5,5'-d(CF<sub>3</sub>)bpy)](PF<sub>6</sub>) (0.01 mmol, 0.02 equiv, 11 mg), and Selectfluor (2 mmol, 4 equiv, 709 mg). The vial was then evacuated and backfilled with nitrogen three times. Degassed acetonitrile-*d*<sub>3</sub> (5 mL) and water-*d*<sub>2</sub> (5 mL) were added to form a suspension. The mixture was sparged with nitrogen for 20 minutes. The reaction was irradiated with blue LEDs strips set inside a beaker, and let stir at room temperature with a fan to cool the reaction setup. After 3 hour, the reaction was concentrated, washed with water, extracted with EtOAc, then purified by silica gel column chromatography to afford the titled compound as a white solid (55 mg, 52%). <sup>1</sup>H NMR (500 MHz, C<sub>6</sub>D<sub>6</sub>) δ 7.84 (d, *J* = 8.9 Hz, 2H), 6.66 (d, *J* = 8.9 Hz, 2H), 4.14 (t, *J* = 6.0 Hz, 1H), 4.05 (t, *J* = 6.0 Hz, 1H), 3.20 (s, 3H), 2.49 (t, *J* = 7.2 Hz, 2H), 1.71 (dt, *J* = 15.00, 7.3 Hz, 2H), 1.50 – 1.39 (m, 2H). <sup>13</sup>C NMR (126 MHz, C<sub>6</sub>D<sub>6</sub>) δ 197.0, 163.6, 130.8, 130.5, 113.9, 83.7 (d, *J* = 166 Hz), 54.9, 37.5, 30.1, 20.3. IR (neat): 2940, 1675, 1599, 1576, 1510, 1256, 1207, 1169, 1029, 815 cm<sup>-1</sup>. HRMS (ESI): exact mass calculated for [M+H]<sup>+</sup> (C<sub>12</sub>H<sub>16</sub>FO<sub>2</sub>) requires *m/z* 211.11288, found *m/z* 211.11271.

**Protocol for forming distally chlorinated ketones  
via PCET-mediated ring-opening of cyclic alcohols**

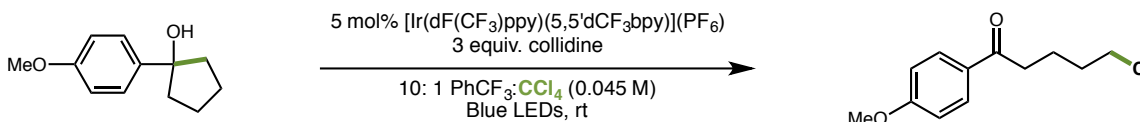

**5-chloro-1-(4-methoxyphenyl)pentan-1-one**

A screw cap culture tube (16 × 125 mm) outfitted with a PTFE/silicone septa was charged with 1-(4-methoxyphenyl)cyclopentan-1-ol (0.5 mmol, 1.0 equiv, 96 mg), redistilled collidine (1.5 mmol, 3 equiv, 198 μL), and [Ir(dF(CF<sub>3</sub>)ppy)<sub>2</sub>(5,5'-d(CF<sub>3</sub>)bpy)](PF<sub>6</sub>) (0.025 mmol, 0.05 equiv, 26 mg) in dry trifluorotoluene (10 mL). The mixture was sparged with argon for 20 minutes. Carbon tetrachloride (10 mmol, 20 equiv, 1 mL) was then added. The reaction was irradiated with four blue LEDs lamps (Kessil H150B LED Grow Light), and let stir at room temperature with a fan to cool the reaction setup. After 18 hours, the reaction was concentrated then purified by silica gel column chromatography to obtain the titled compound as a white solid (112 mg, 98%). <sup>1</sup>H NMR (500 MHz, C<sub>6</sub>D<sub>6</sub>) δ 7.83 (d, *J* = 8.8 Hz, 2H), 6.66 (d, *J* = 8.9 Hz, 2H), 3.19 (s, 3H), 3.09 (t, *J* = 6.7 Hz, 2H), 2.40 (t, *J* = 7.2 Hz, 2H), 1.67 (dt, *J* = 15.0, 7.2 Hz, 2H), 1.47 (dt, *J* = 14.0, 6.8 Hz, 2H). <sup>13</sup>C NMR (126 MHz, C<sub>6</sub>D<sub>6</sub>) δ 196.5, 163.2, 130.3, 130.1, 113.5, 54.5, 44.4, 36.7, 32.0, 21.4. IR (neat): 2952, 1666, 1600, 1576, 1510, 1460, 1443, 1418, 1375, 1309, 1293, 1261, 1240, 1171, 1114, 1027, 980, 836, 786, 736, 704 cm<sup>-1</sup>. HRMS (ESI): exact mass calculated for [M+H]<sup>+</sup> (C<sub>12</sub>H<sub>16</sub>ClO<sub>2</sub>) requires *m/z* 227.08334, found *m/z* 227.08298.

**Protocol for forming distally brominated ketones  
via PCET-mediated ring-opening of cyclic alcohols**

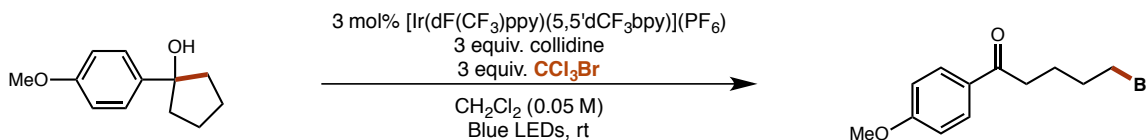

**5-bromo-1-(4-methoxyphenyl)pentan-1-one**

A screw cap culture tube (16 × 125 mm) outfitted with a PTFE/silicone septa was charged with 1-(4-methoxyphenyl)cyclopentan-1-ol (0.5 mmol, 1 equiv, 96 mg), redistilled collidine (1.5 mmol, 3 equiv, 198 μL), and [Ir(dF(CF<sub>3</sub>)ppy)<sub>2</sub>(5,5'd(CF<sub>3</sub>)bpy)](PF<sub>6</sub>) (0.015 mmol, 0.03 equiv, 16 mg). The vial was then evacuated and backfilled with argon three times. Bromotrichloromethane (1.5 mmol, 3 equiv, 147 μL) and dry CH<sub>2</sub>Cl<sub>2</sub> (10 mL) were added. The reaction was irradiated with four blue LEDs lamps (Kessil H150B LED Grow Light), and let stir at room temperature with a fan to cool the reaction setup. After 24 hours, the reaction was concentrated then purified by silica gel column chromatography to obtain the titled compound (129 mg, 95% yield). <sup>1</sup>H NMR (500 MHz, C<sub>6</sub>D<sub>6</sub>) δ 7.83 (d, *J* = 8.8 Hz, 2H), 6.66 (d, *J* = 8.8 Hz, 2H), 3.19 (s, 3H), 2.93 (t, *J* = 6.8 Hz, 2H), 2.38 (t, *J* = 7.1 Hz, 2H), 1.65 (p, *J* = 7.1 Hz, 2H), 1.54 (p, *J* = 6.8 Hz, 2H). <sup>13</sup>C NMR (126 MHz, C<sub>6</sub>D<sub>6</sub>) δ 196.4, 163.2, 130.3, 130.1, 113.5, 54.5, 36.6, 33.0, 32.1, 22.7. IR (neat): 2949, 1665, 1600, 1513, 1459, 1438, 1406, 1375, 1309, 1266, 1226, 1186, 1172, 1115, 1027, 982, 834, 778, 737 cm<sup>-1</sup>. HRMS (ESI): exact mass calculated for [M+H]<sup>+</sup> (C<sub>12</sub>H<sub>16</sub>BrO<sub>2</sub>) requires *m/z* 271.03282, found *m/z* 271.03285.

## Protocol for Baeyer-Villiger oxidation of ketone product

To verify that the PMP-ketone products can be easily derivatized via Baeyer-Villiger oxidation to furnish free carboxylic acid, 1-(4-methoxyphenyl)propan-1-one was subjected to classical Baeyer-Villiger conditions, the procedure and result of which are outlined below.

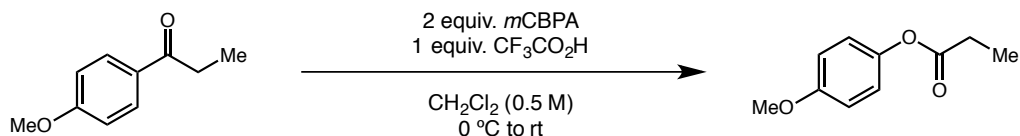

### 4-methoxyphenyl propionate

A screw-cap 2-dram vial was charged with 1-(4-methoxyphenyl)propan-1-one (1.0 mmol, 1.0 equiv, 164 mg) and 3-chlorobenzoperoxoic acid (~ 70% purity, 493 mg; 2.0 mmol, 2.0 equiv in pure *m*CPBA). The solids were dissolved in 2 mL of CH<sub>2</sub>Cl<sub>2</sub> to form a suspension, which was stirred vigorously while cooled with an ice bath. Trifluoroacetic acid (1.0 mmol, 1.0 equiv, 75  $\mu$ L) was added slowly via syringe. The vial was left in the ice bath overnight, during which time the reaction warmed up to room temperature. The crude material was washed in saturated NaHCO<sub>3</sub>, extracted with CH<sub>2</sub>Cl<sub>2</sub>, concentrate to small volume, and purified by silica gel column chromatography to afford the titled compound as a colorless liquid (147 mg, 81%). Spectra are consistent with reported literature values.<sup>12</sup>

# $^1\text{H}$ and $^{13}\text{C}$ NMR Spectra of Products

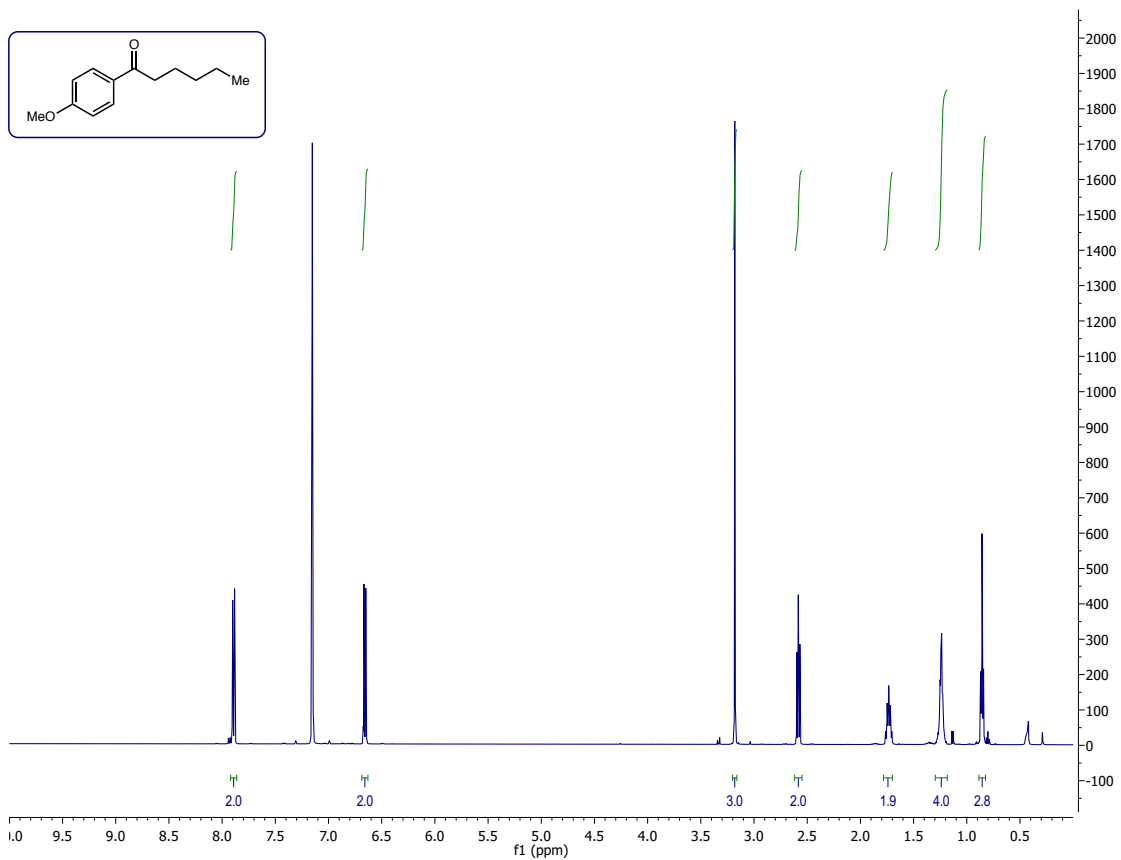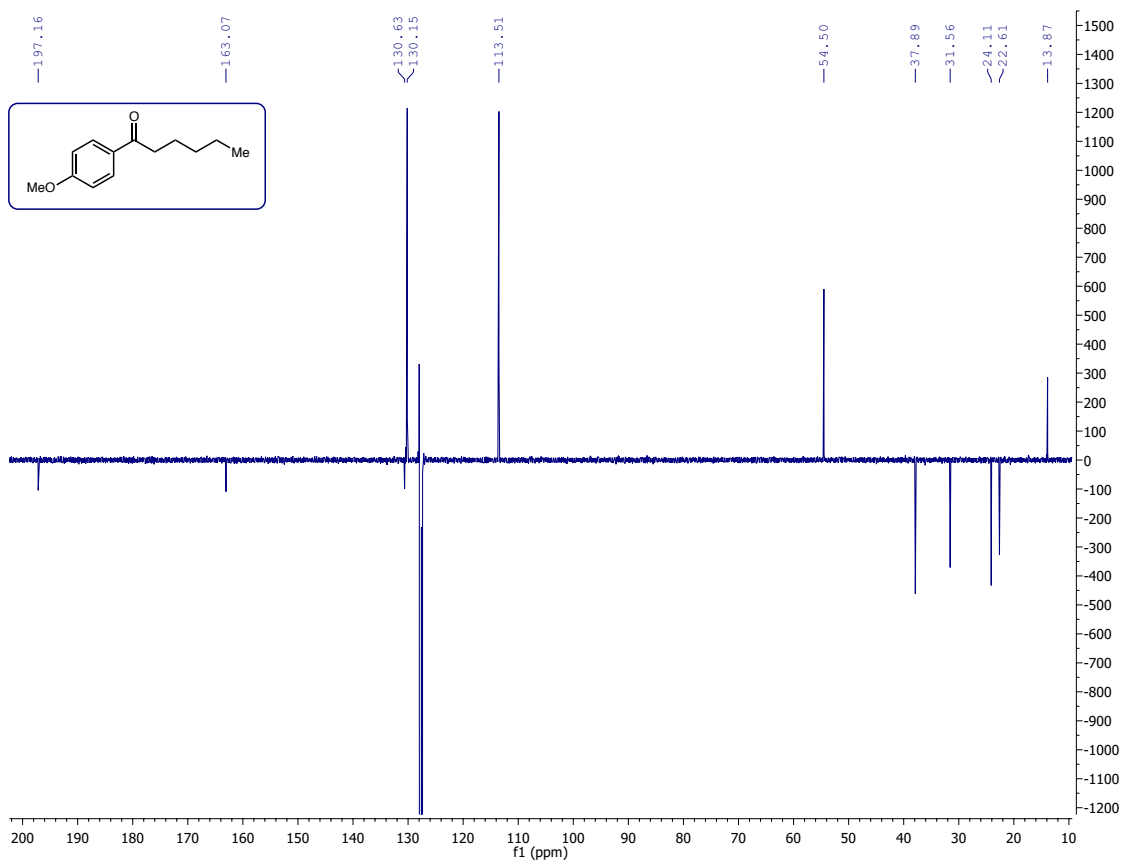

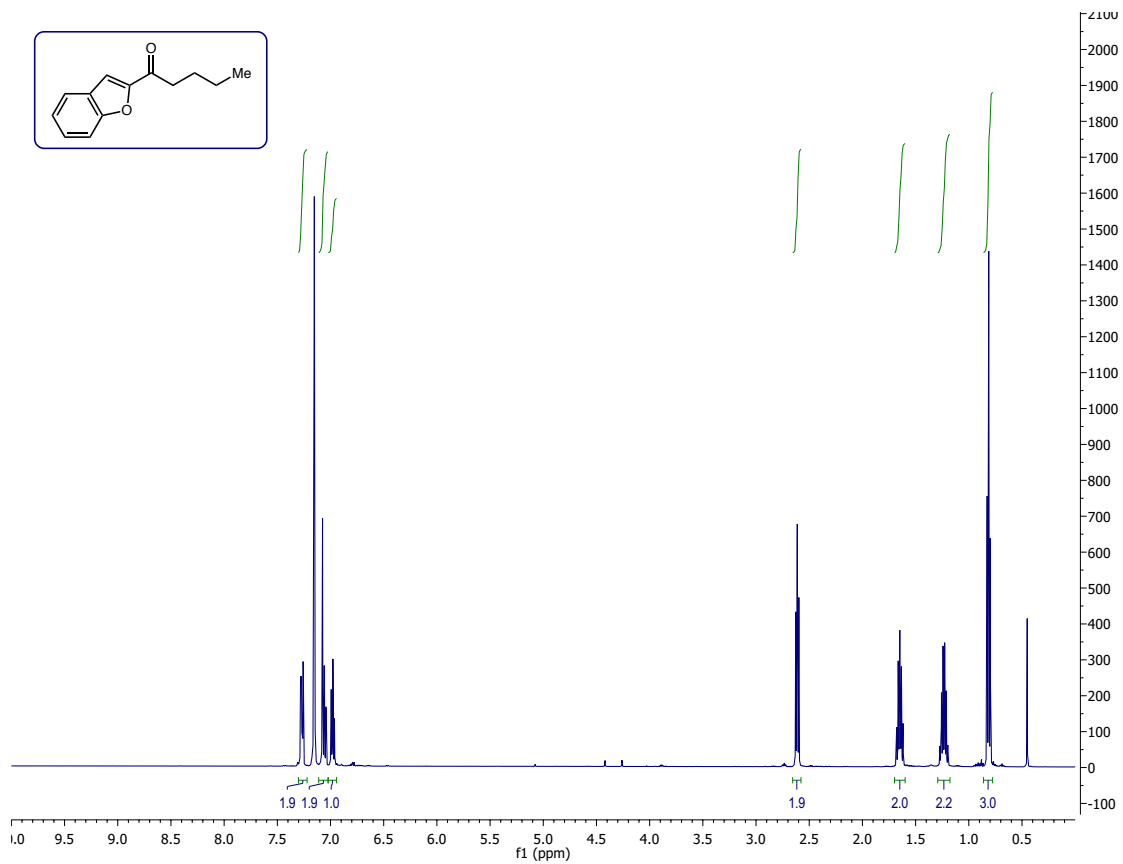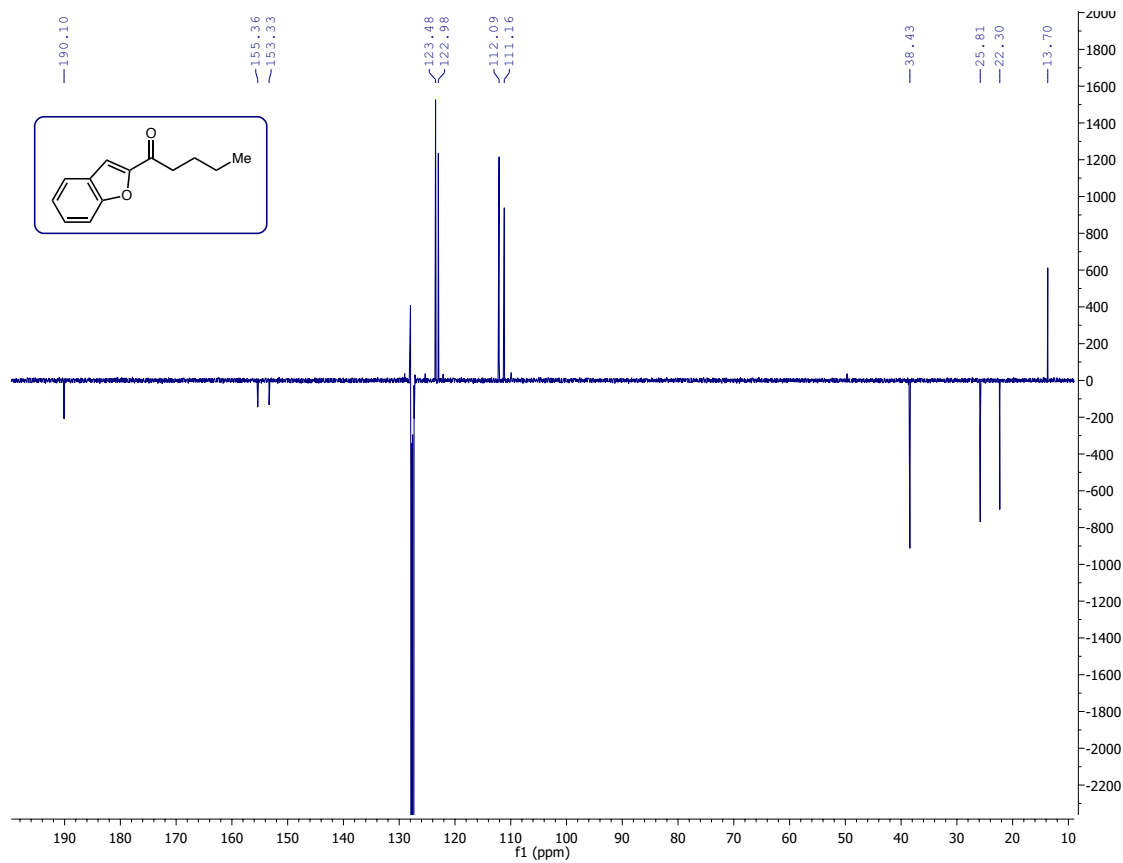

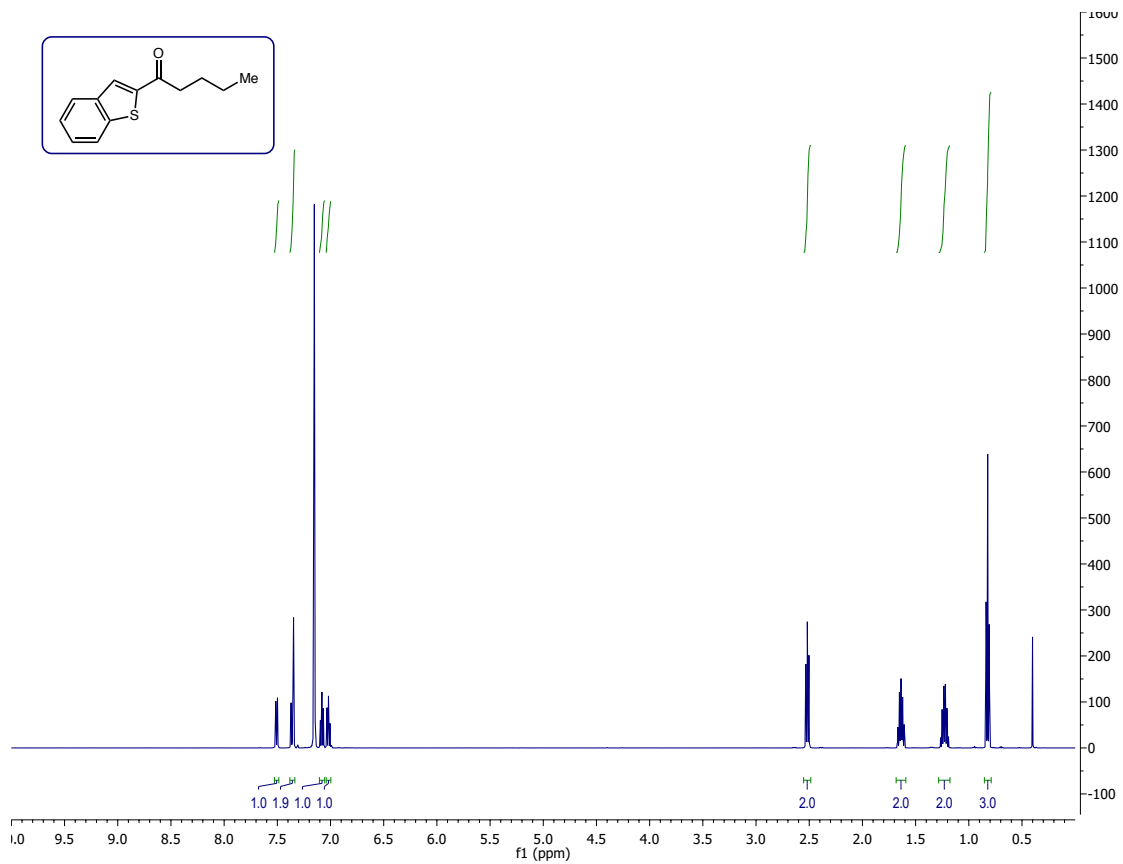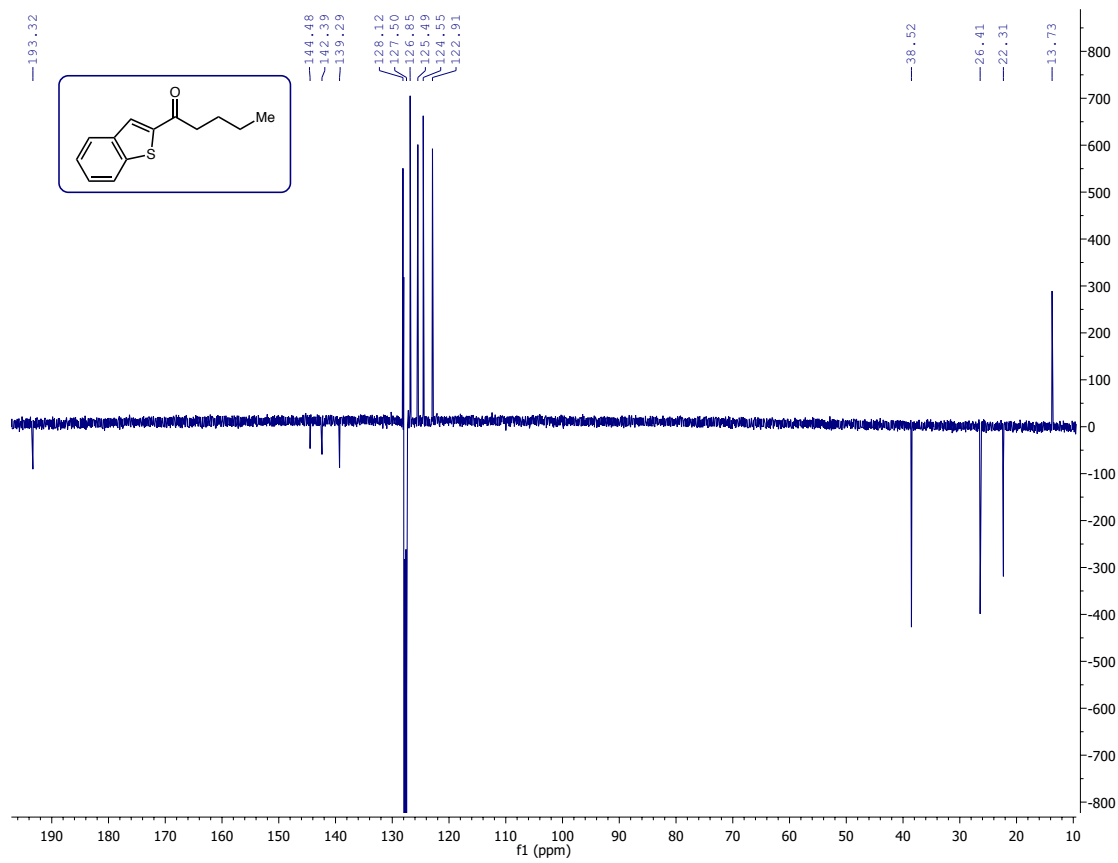

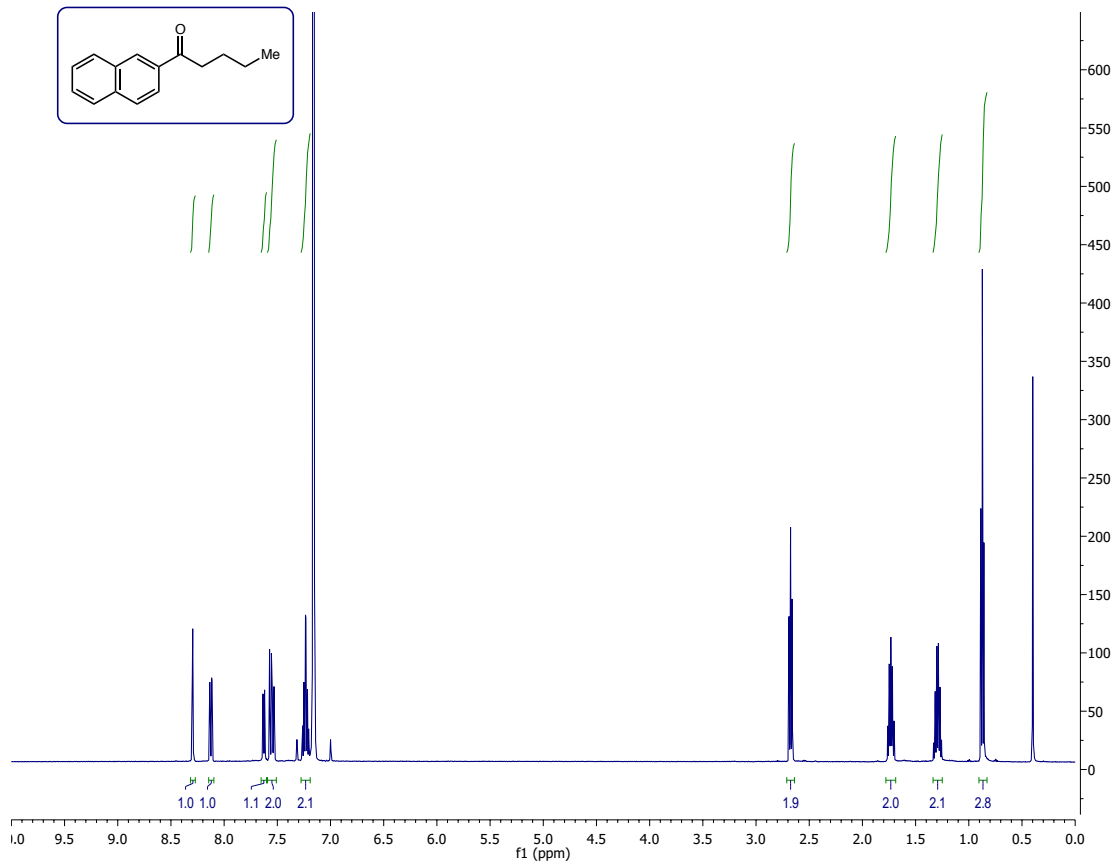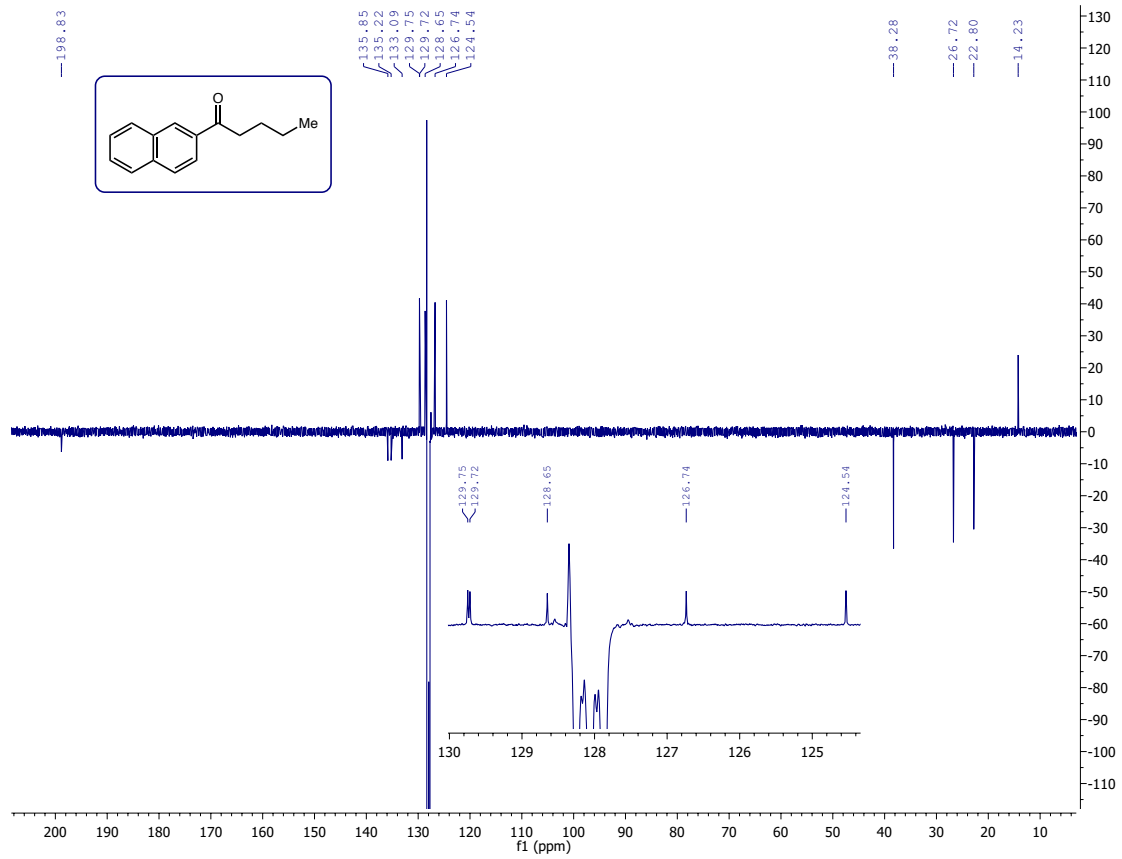

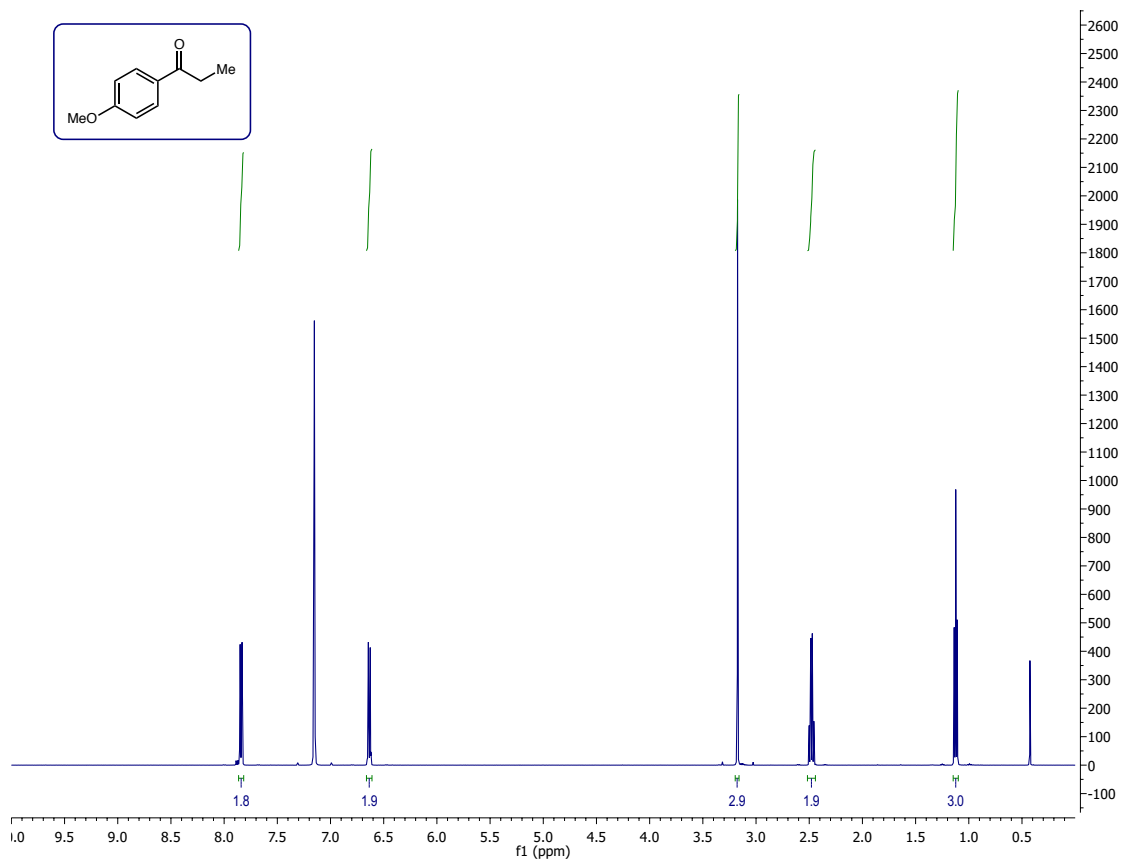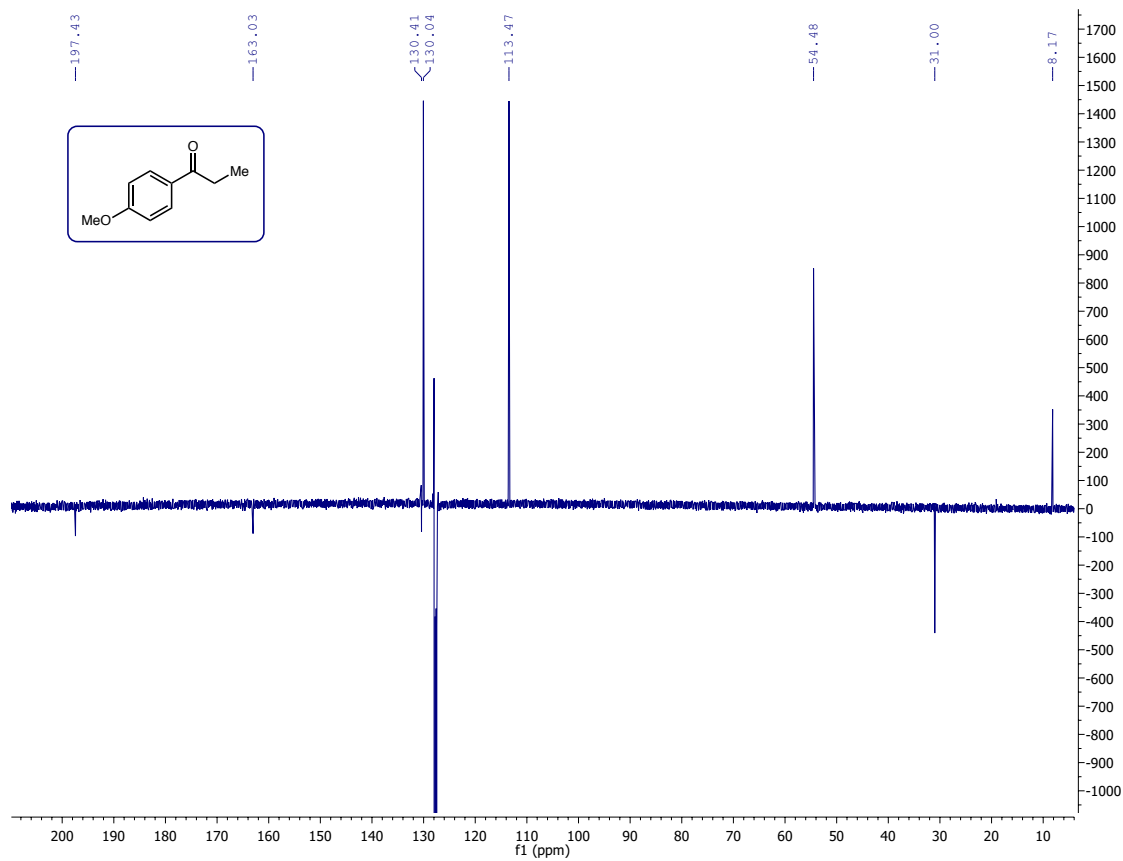



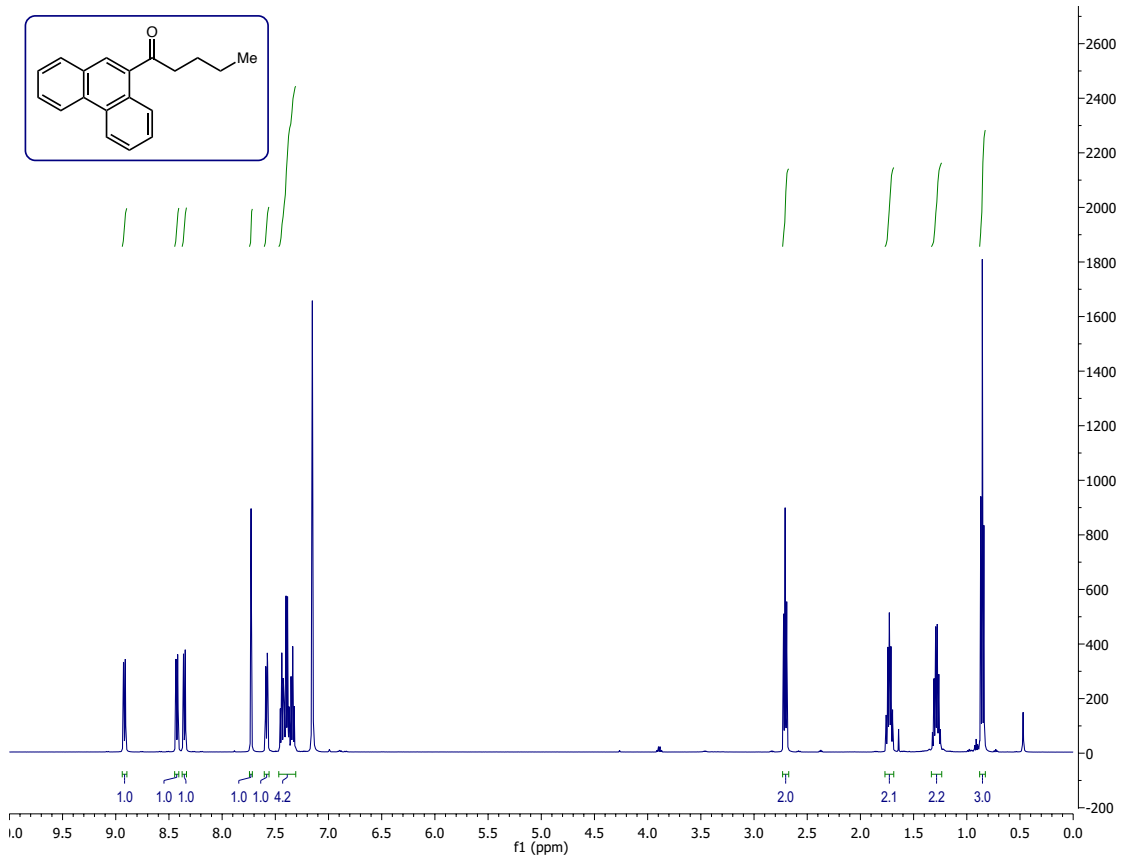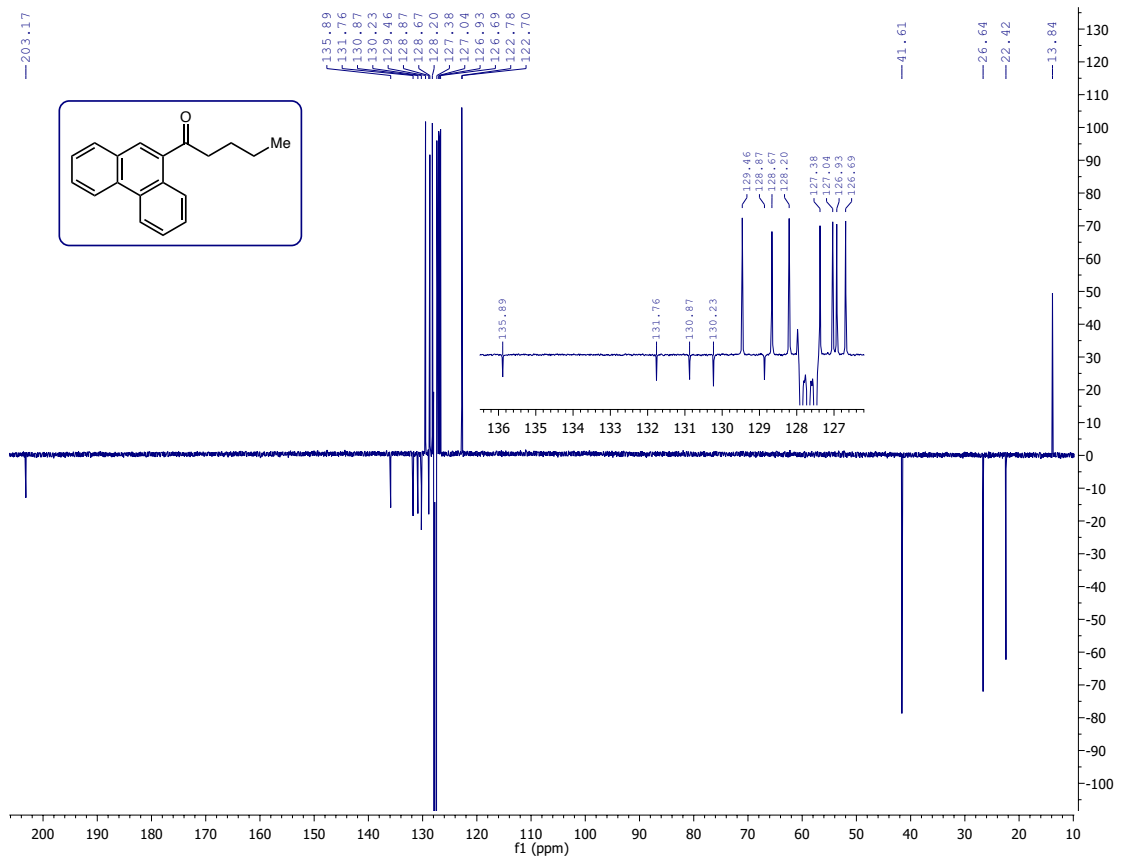

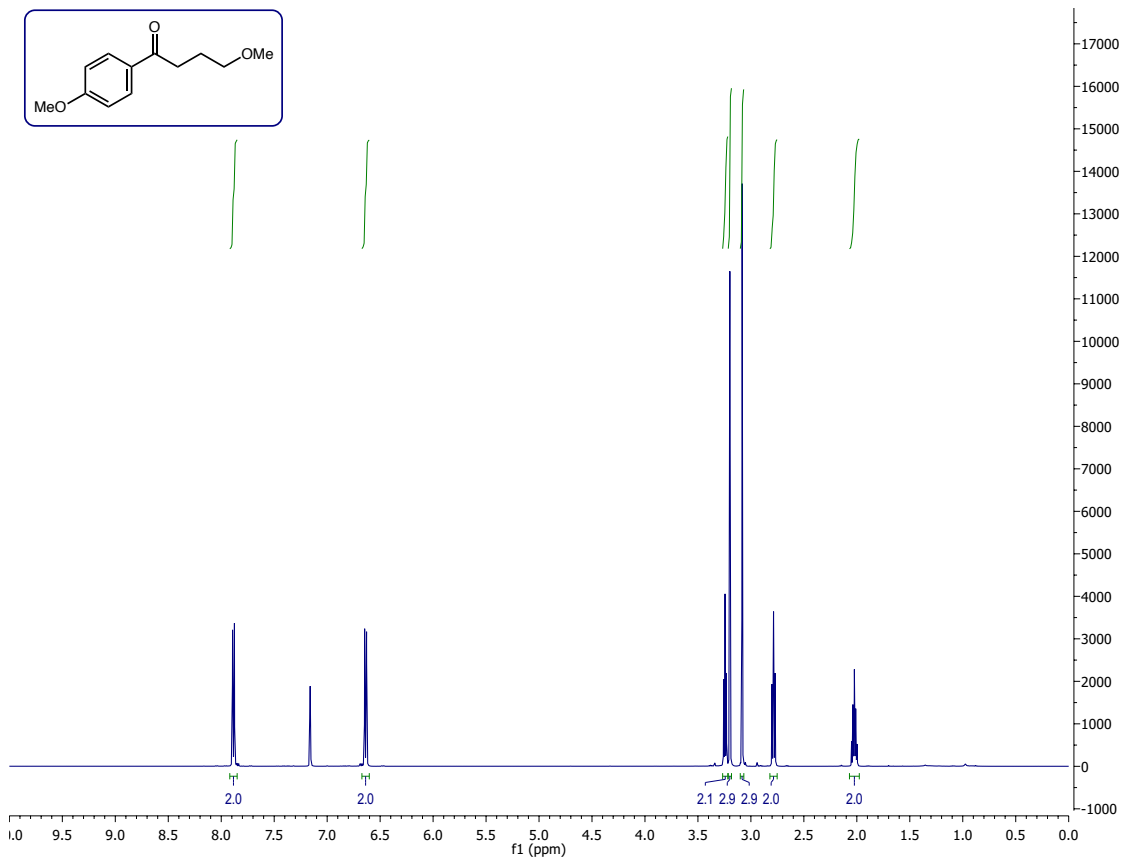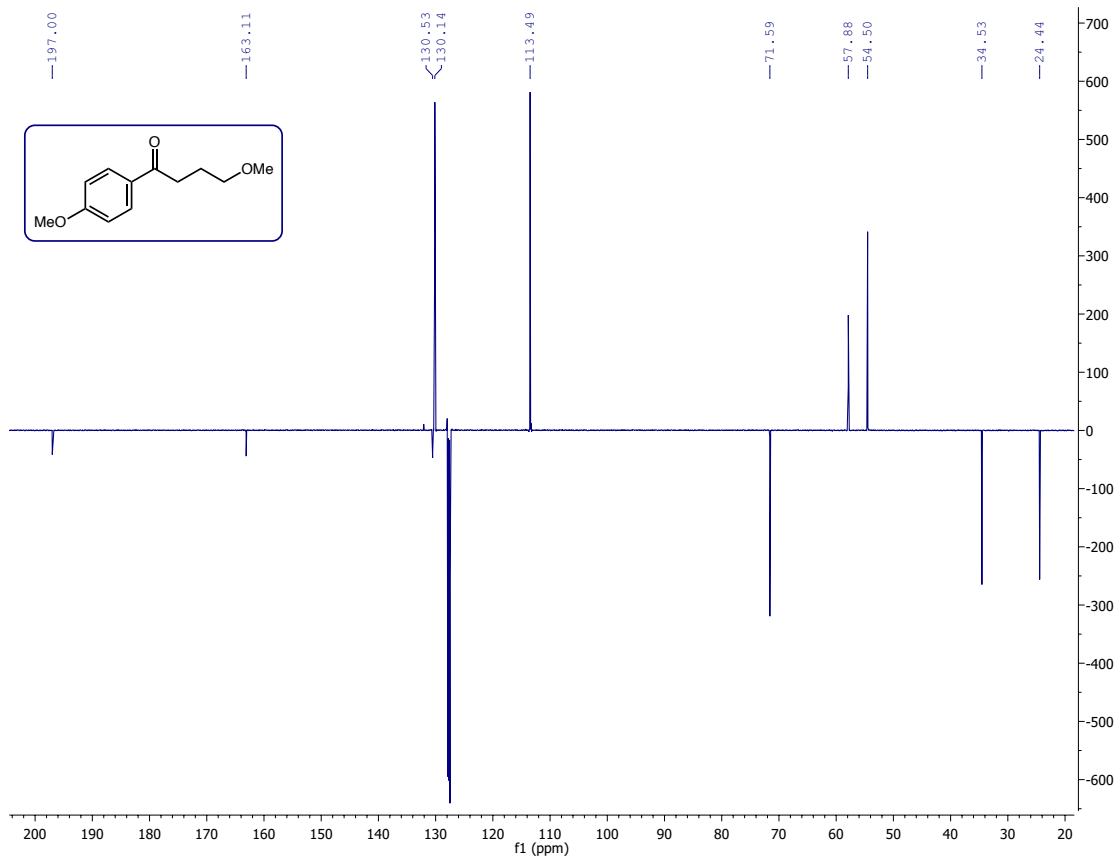

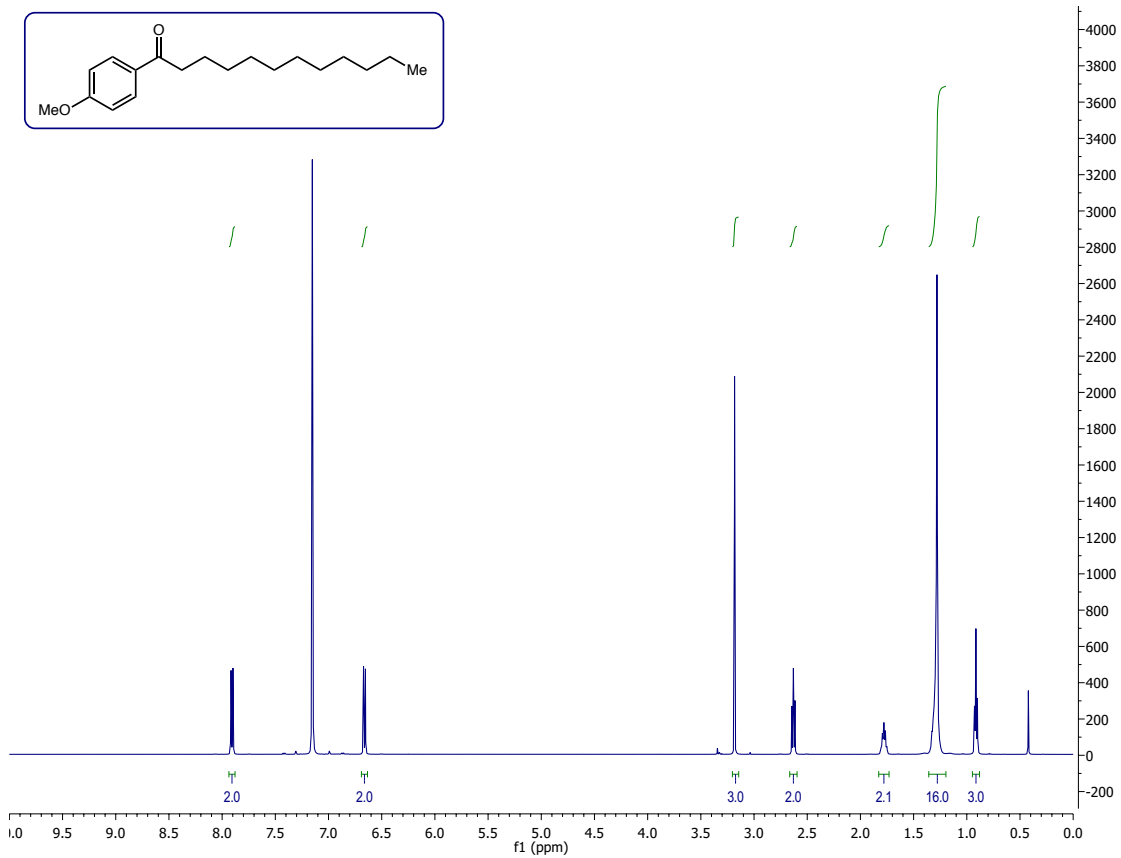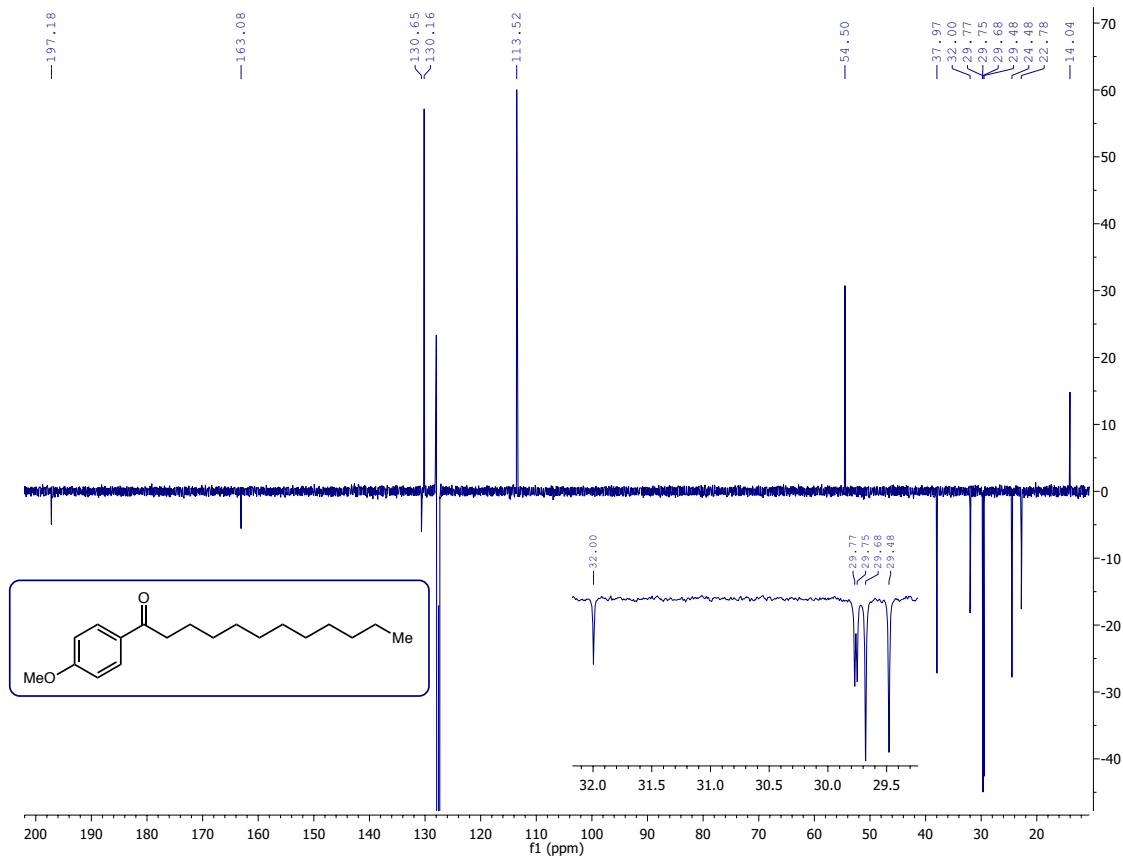

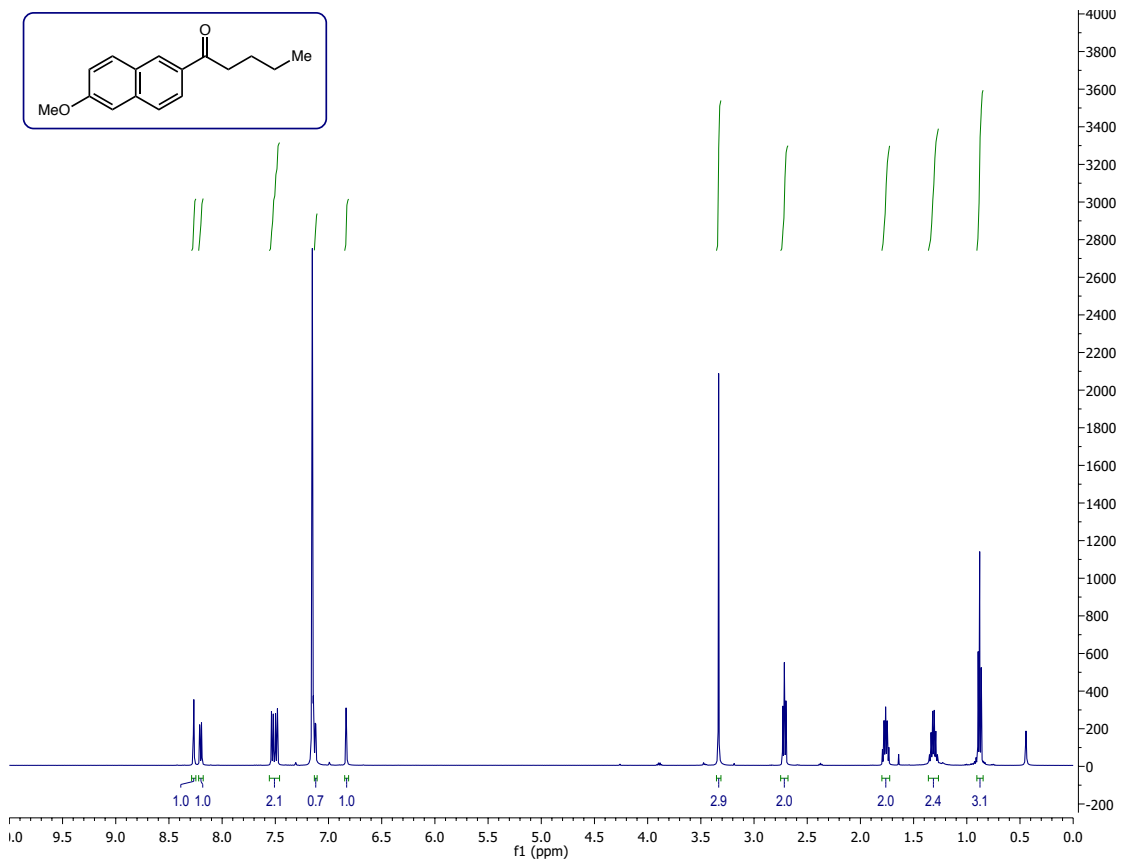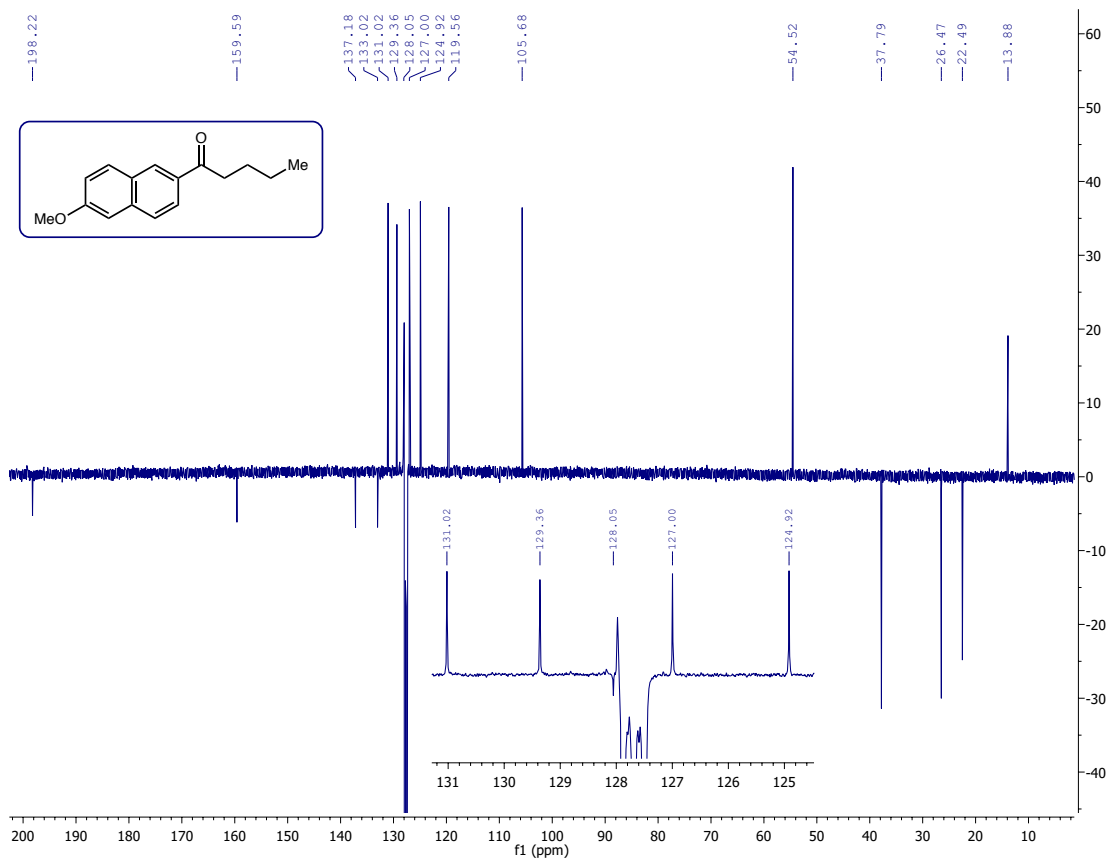

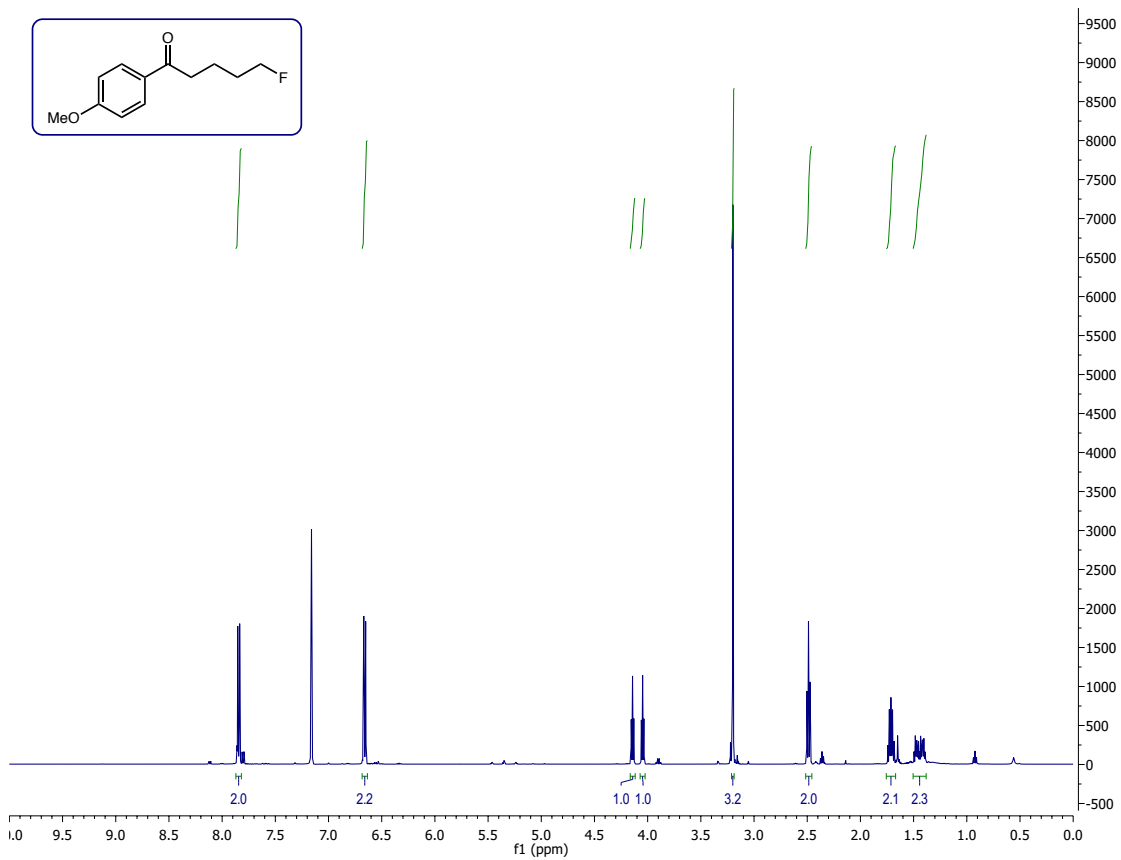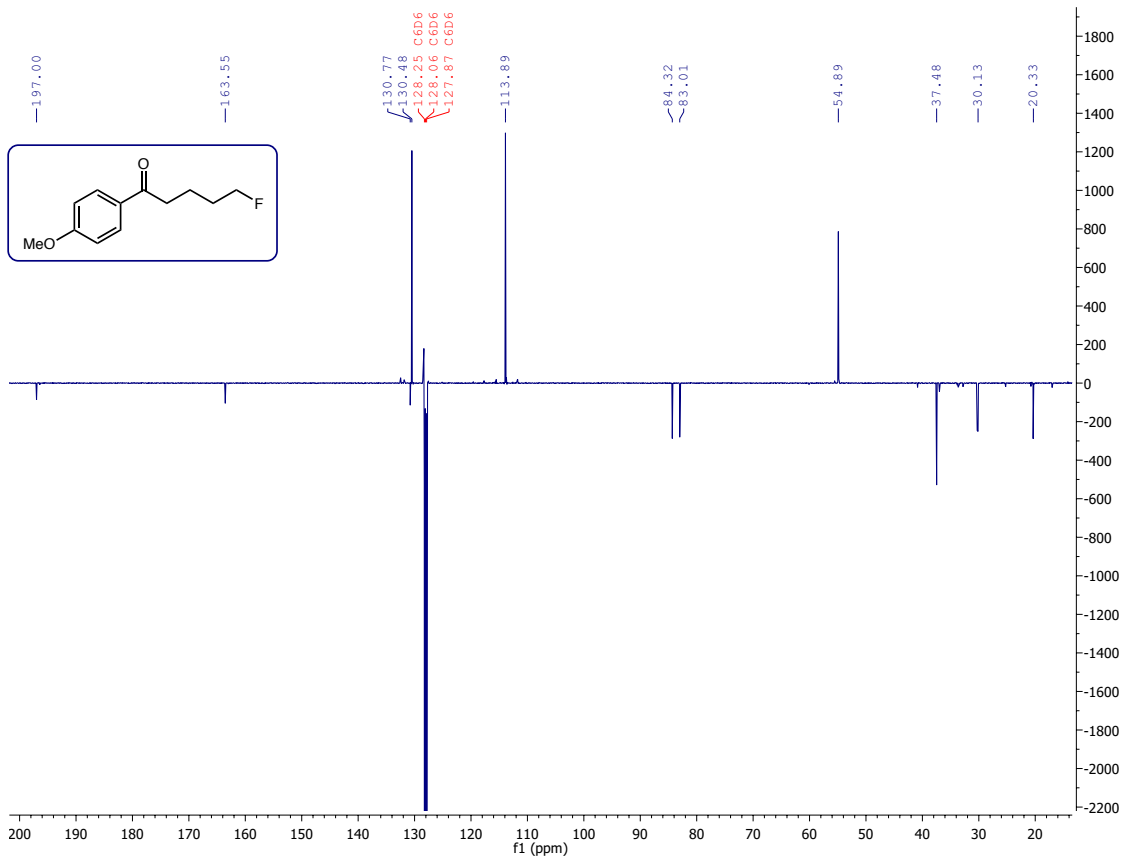

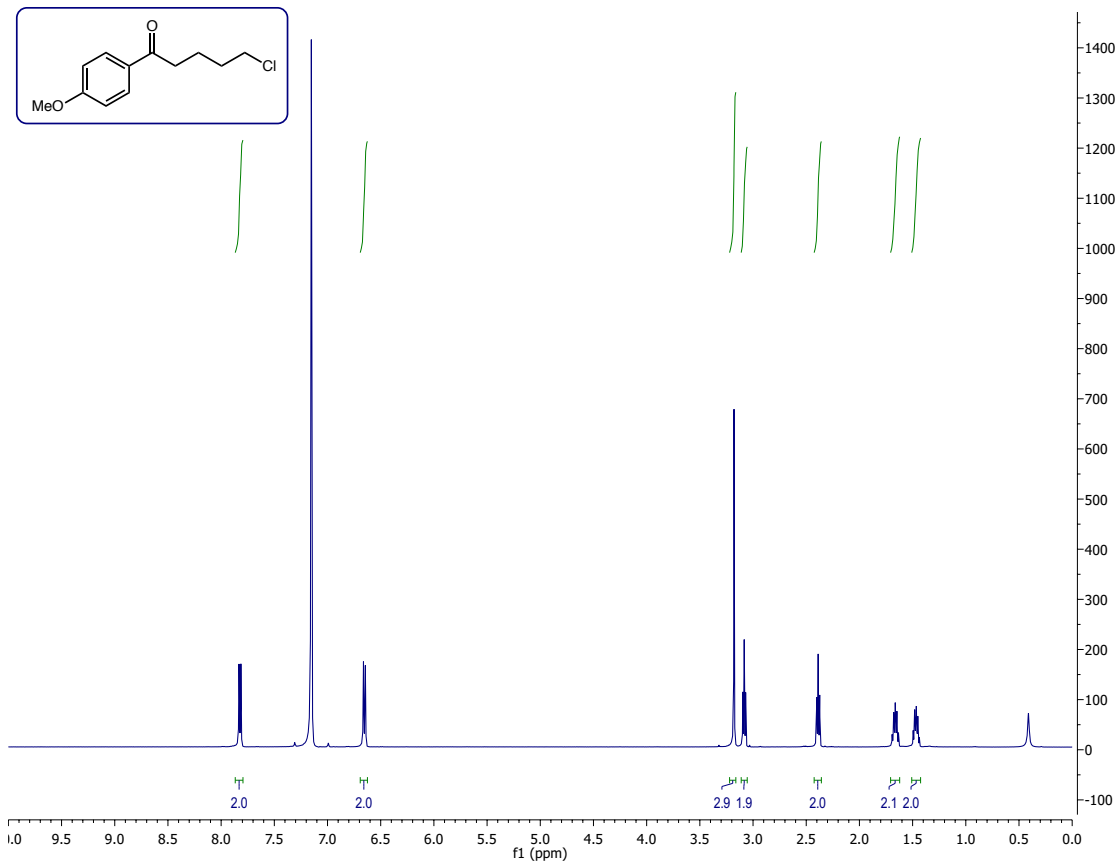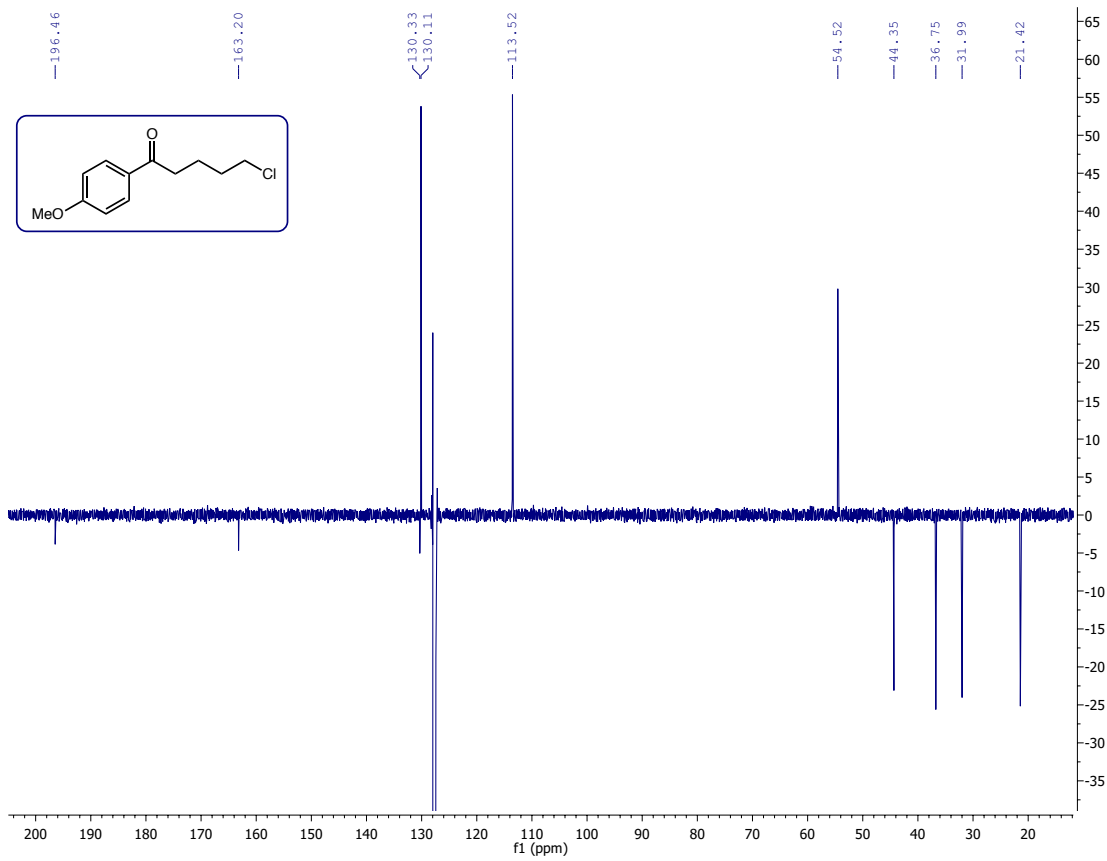

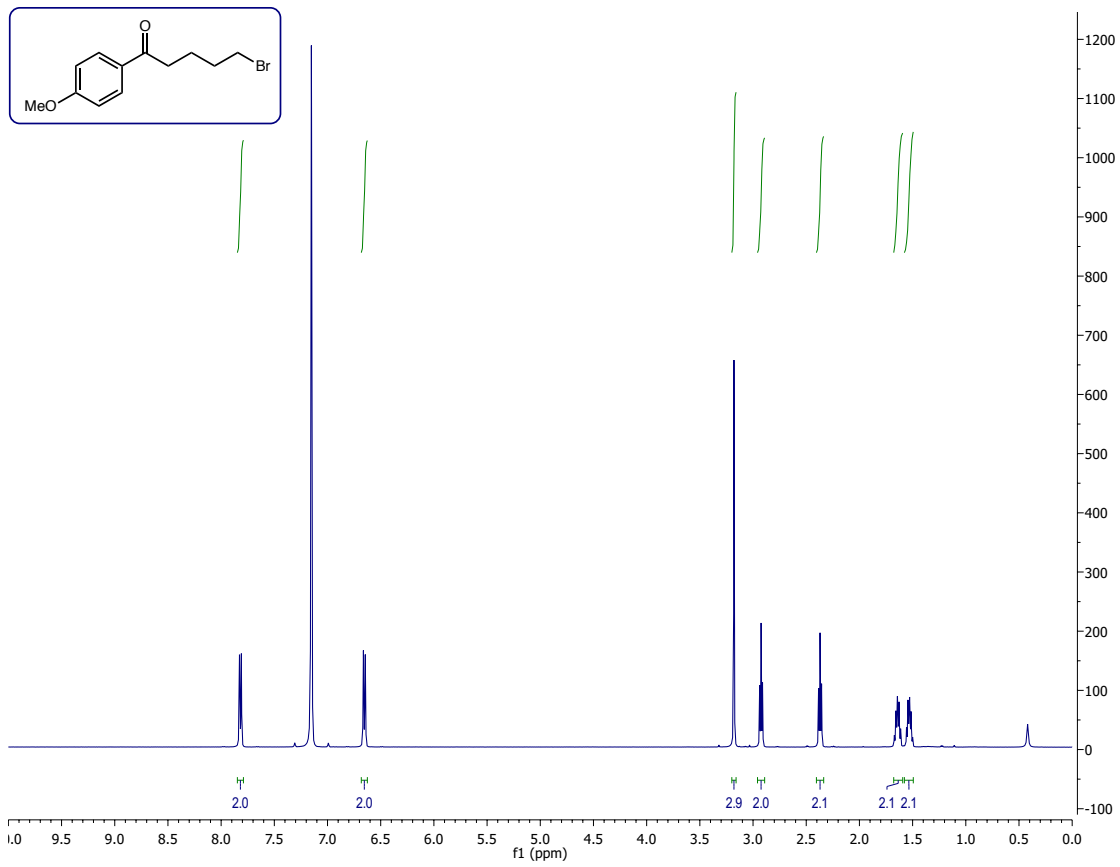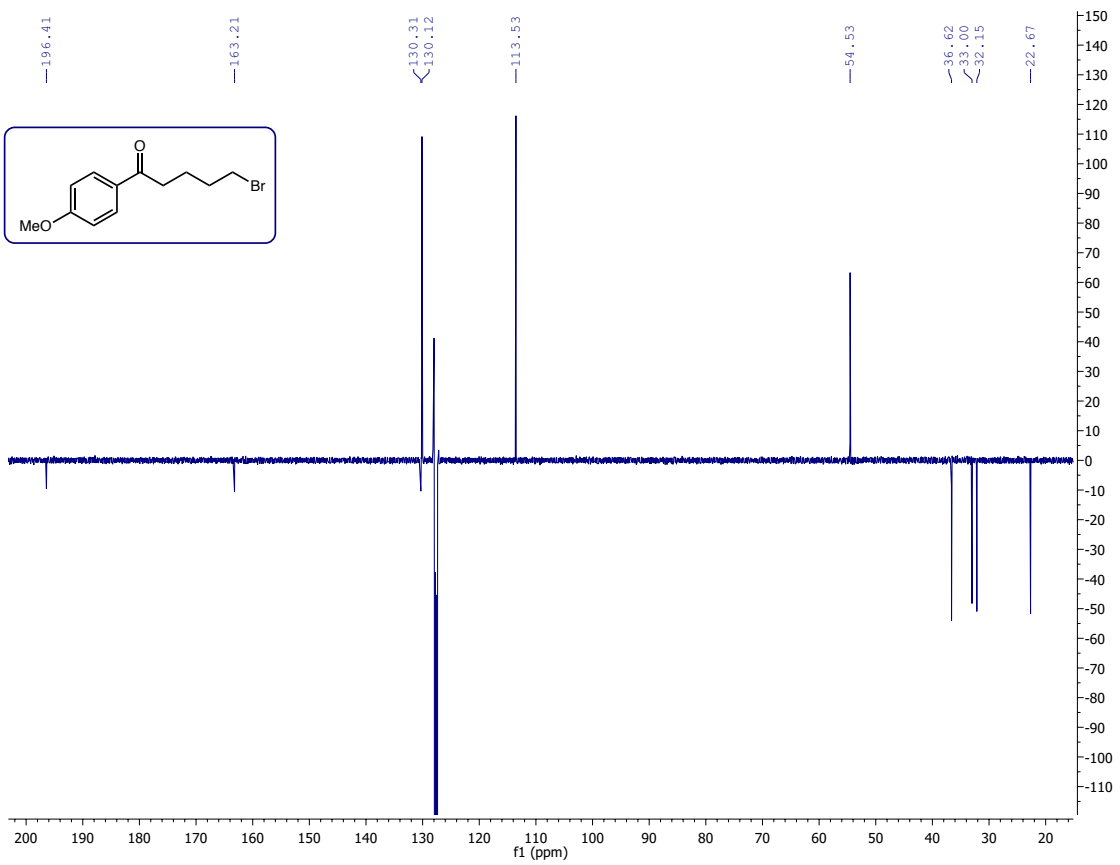

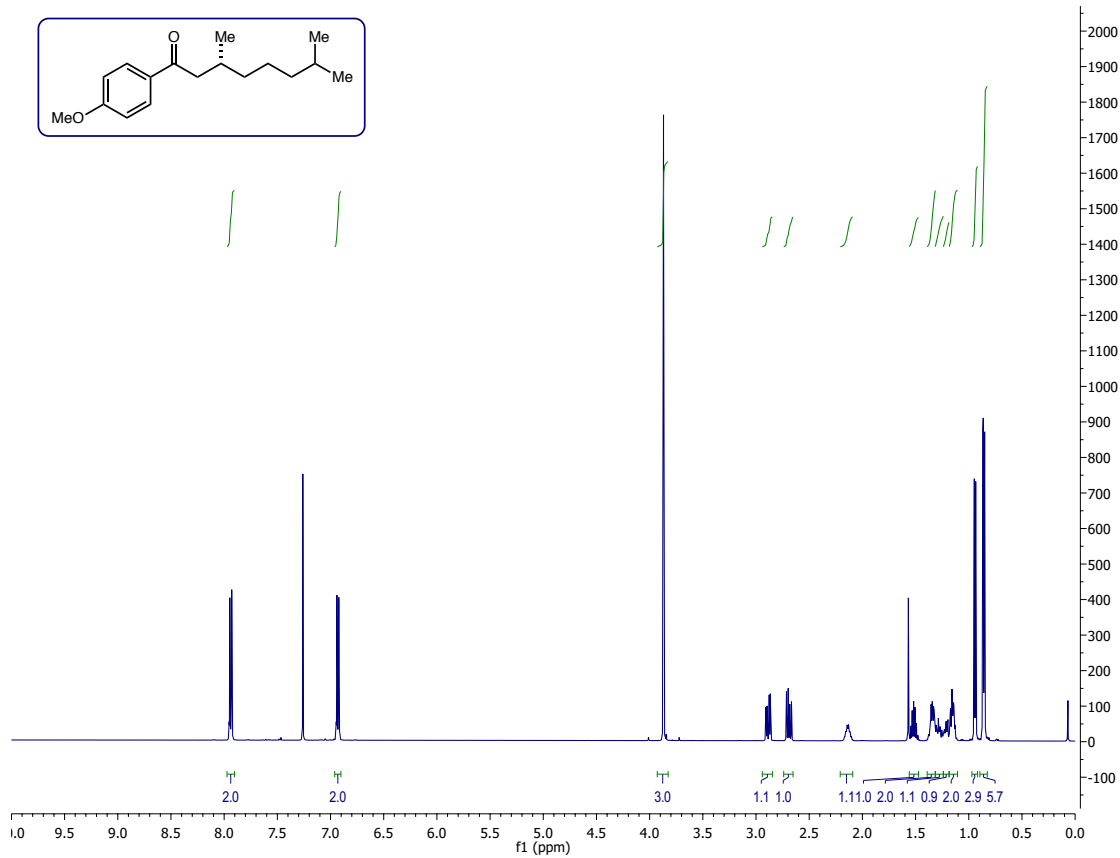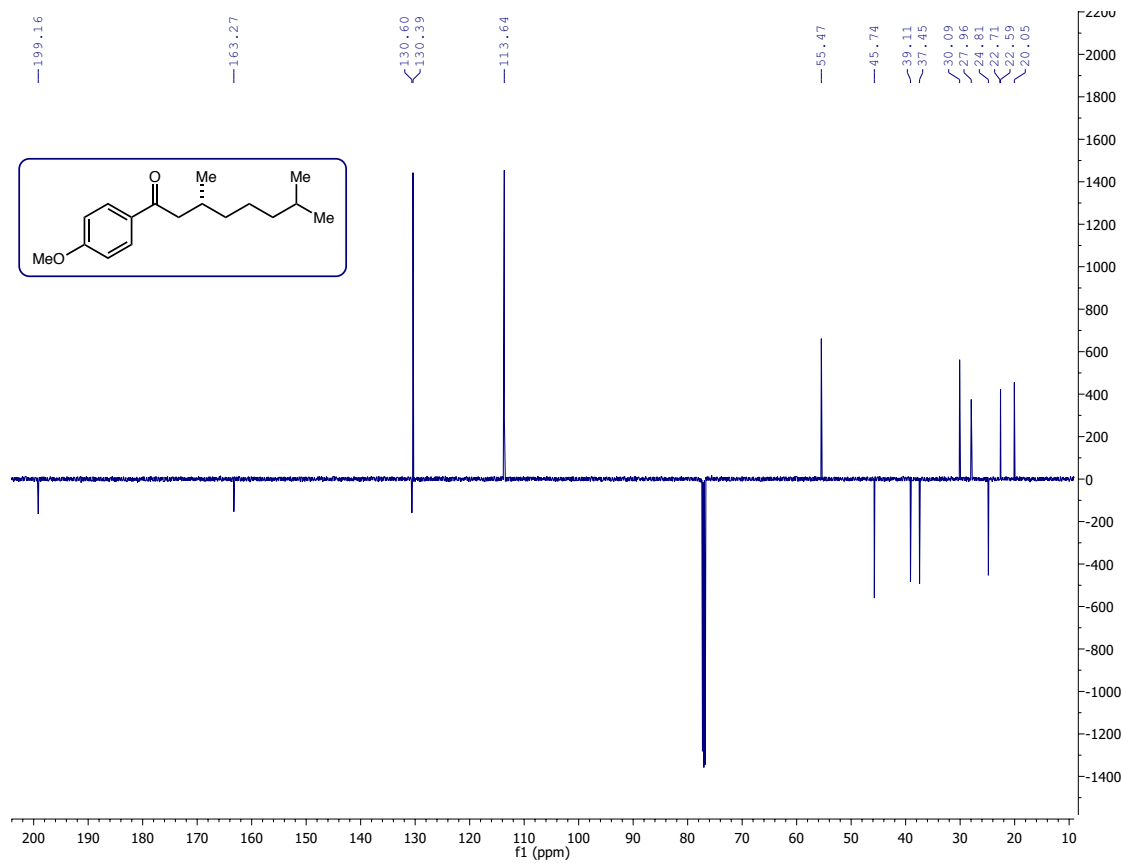



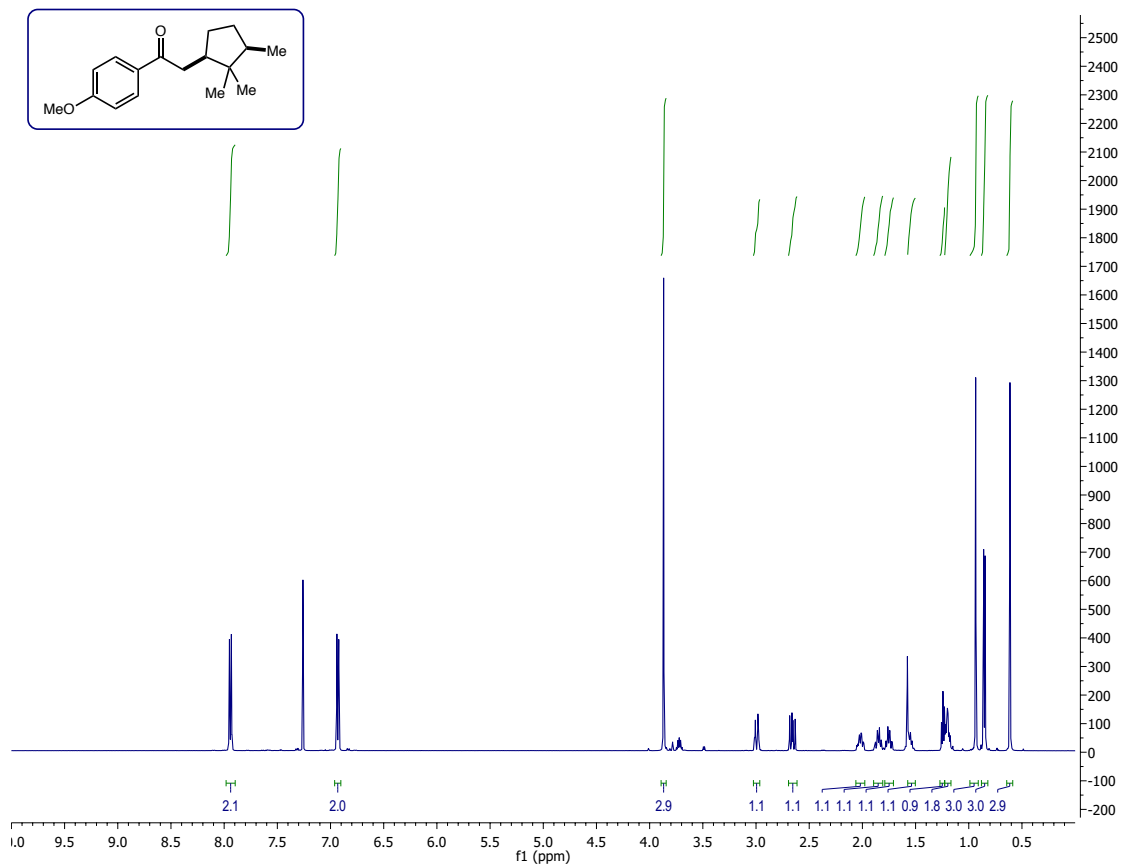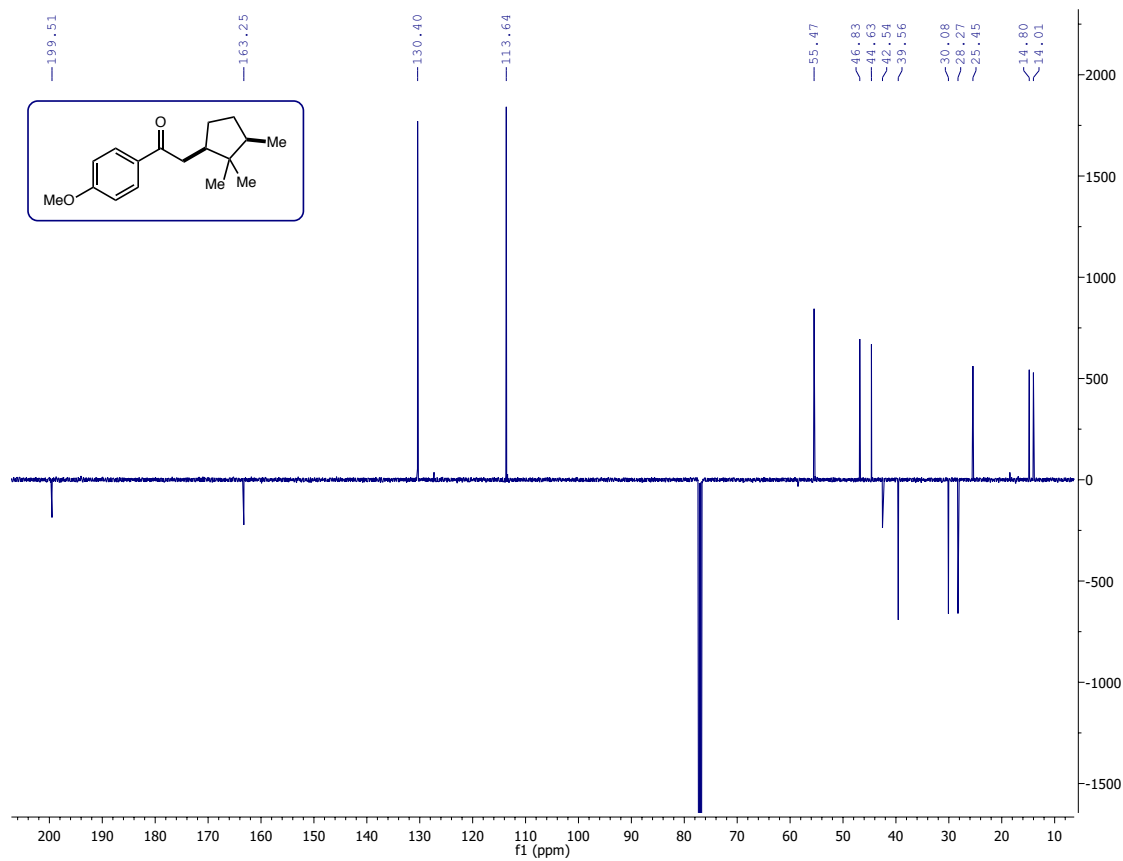

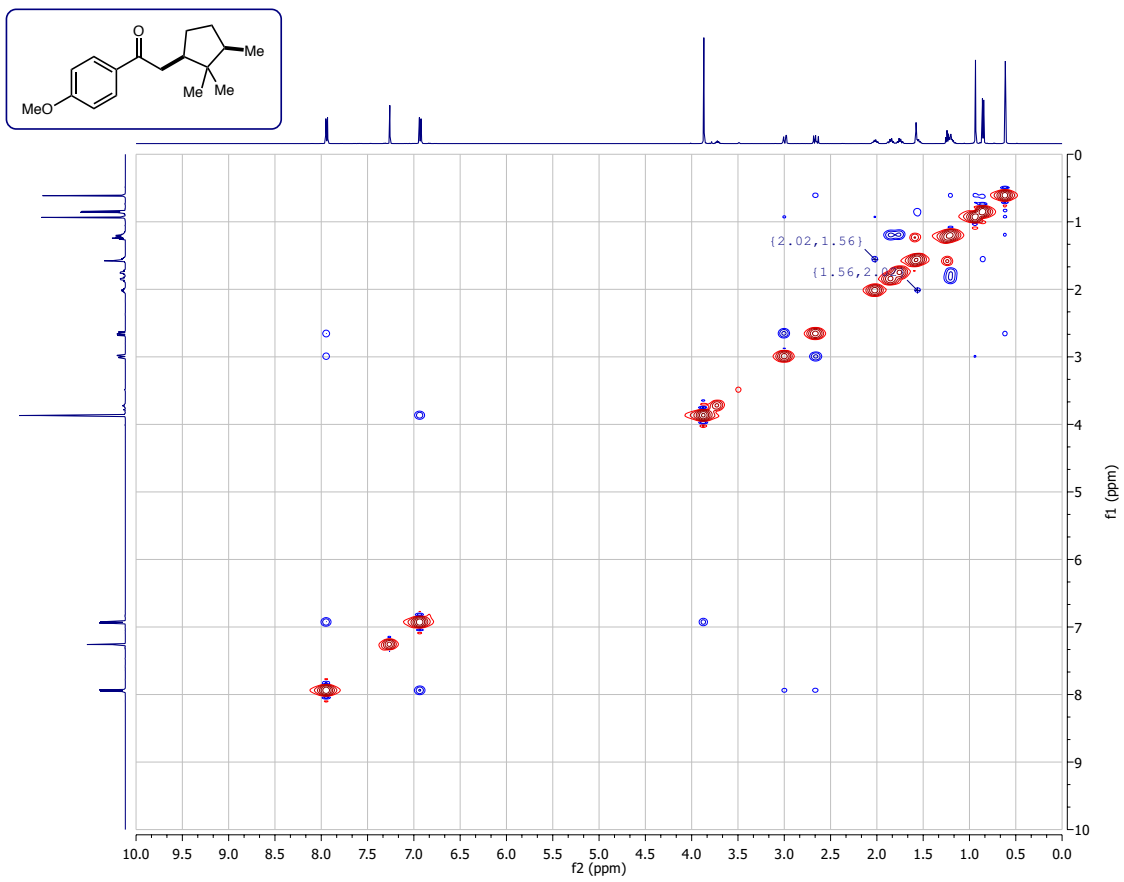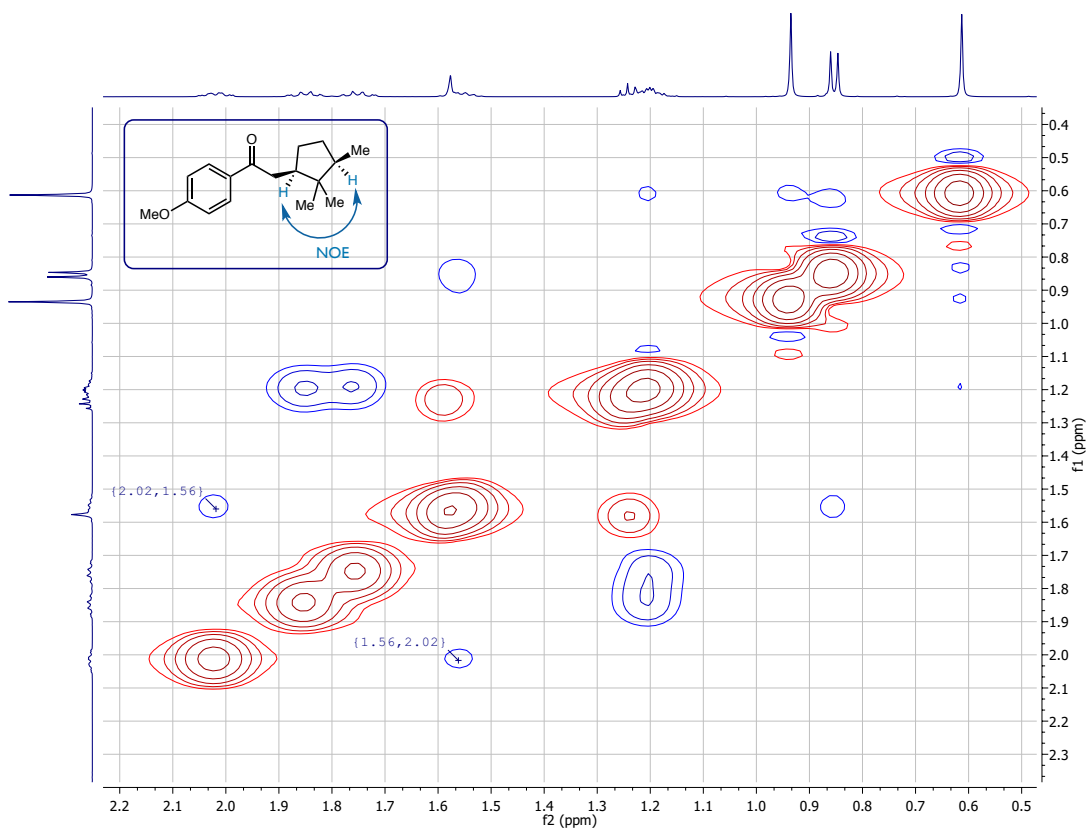

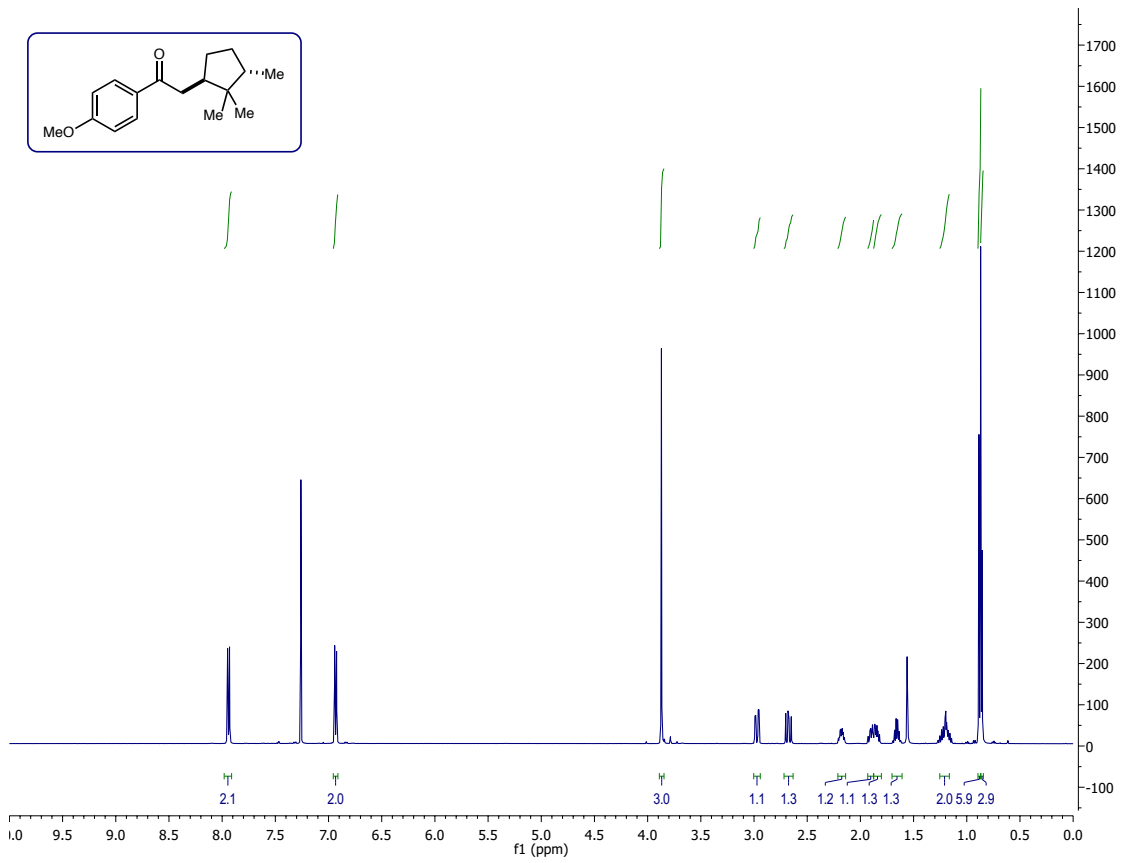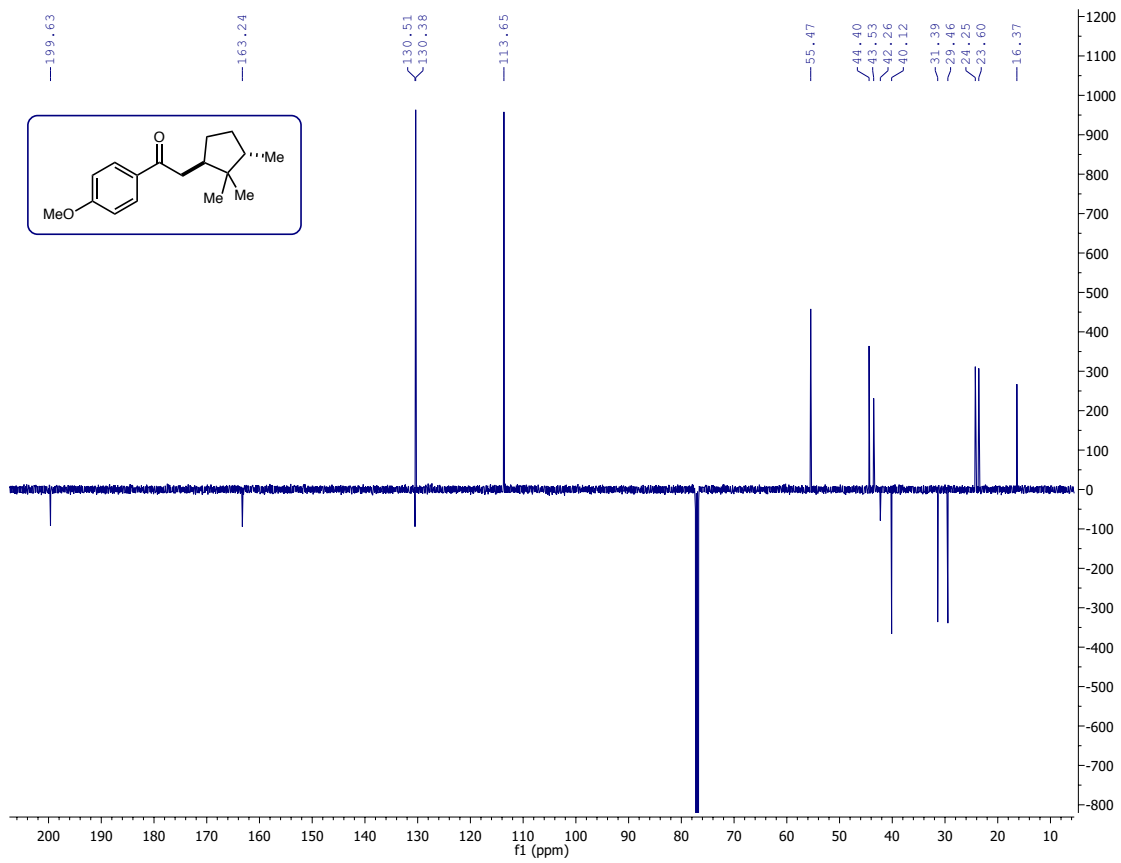

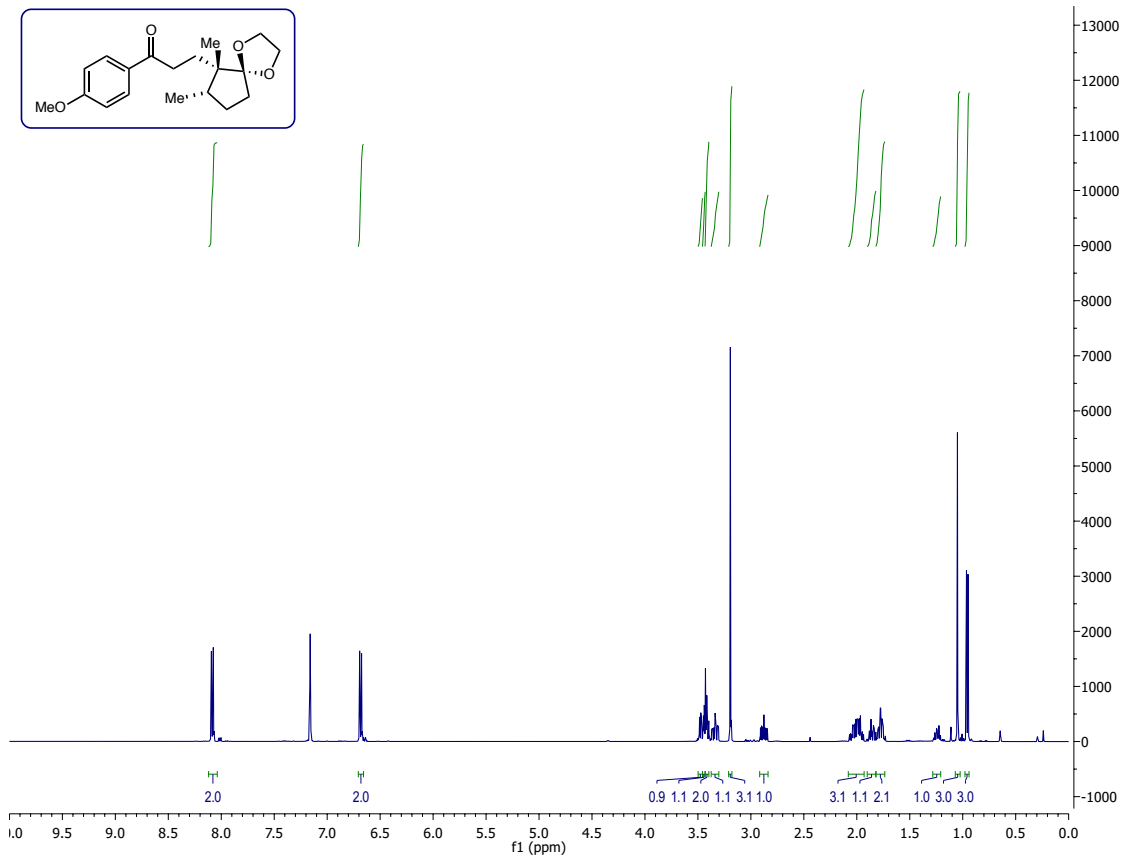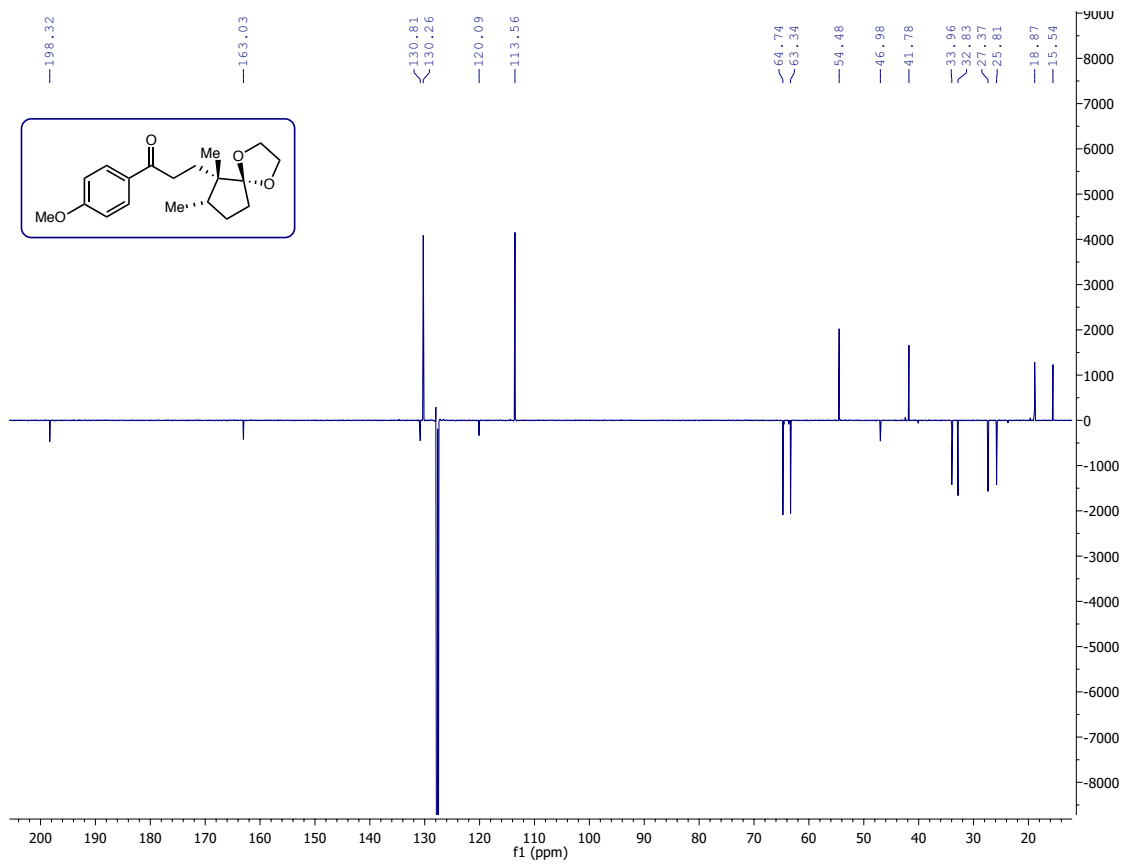

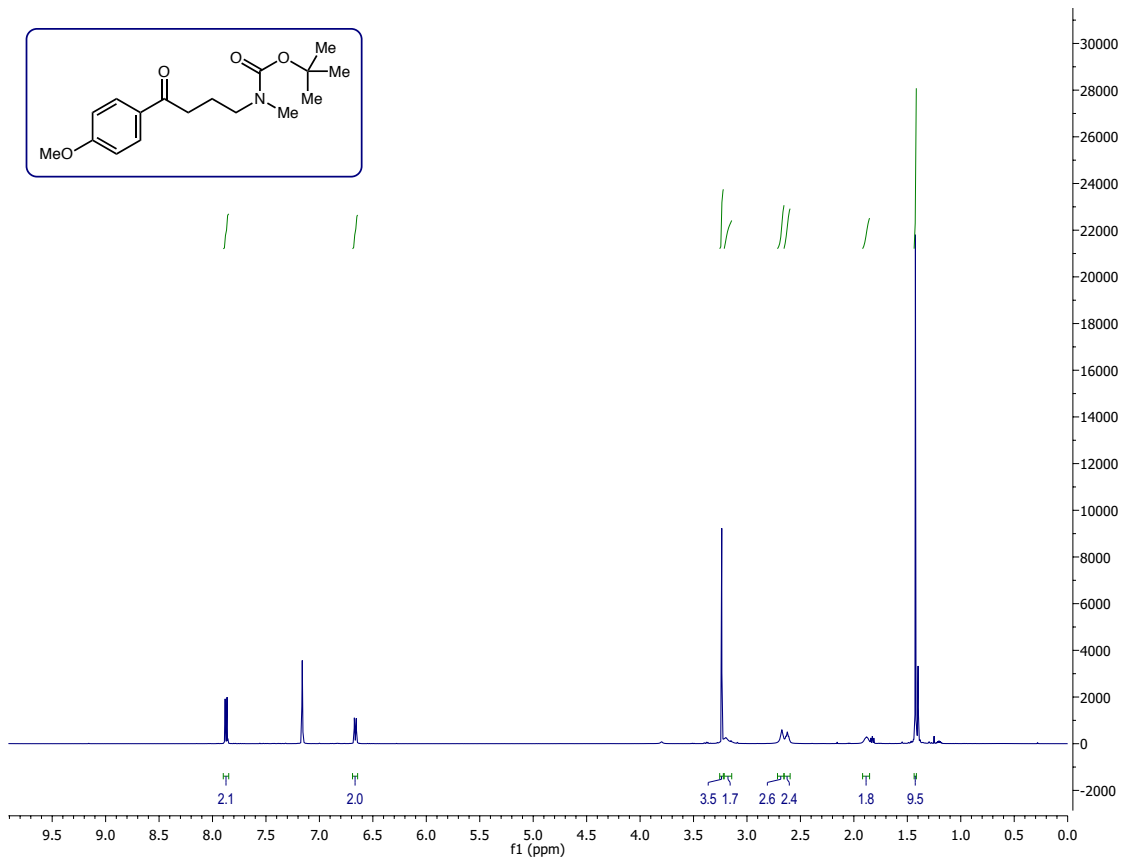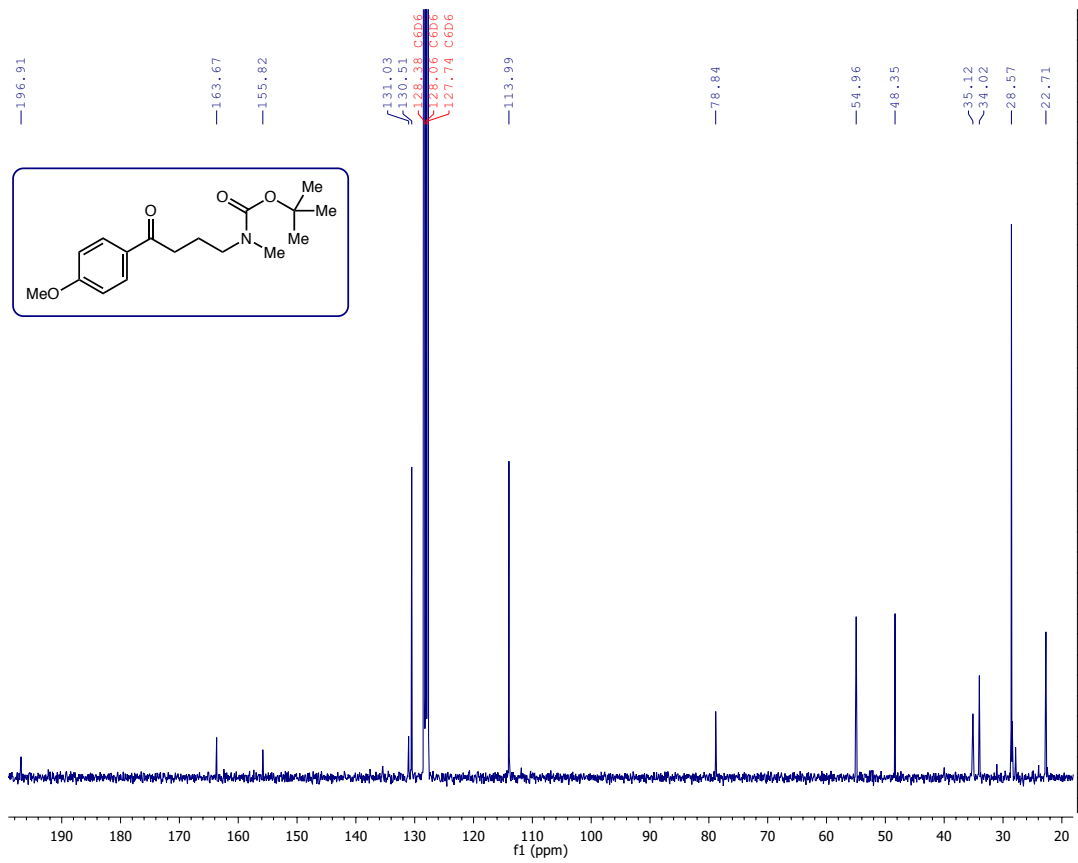

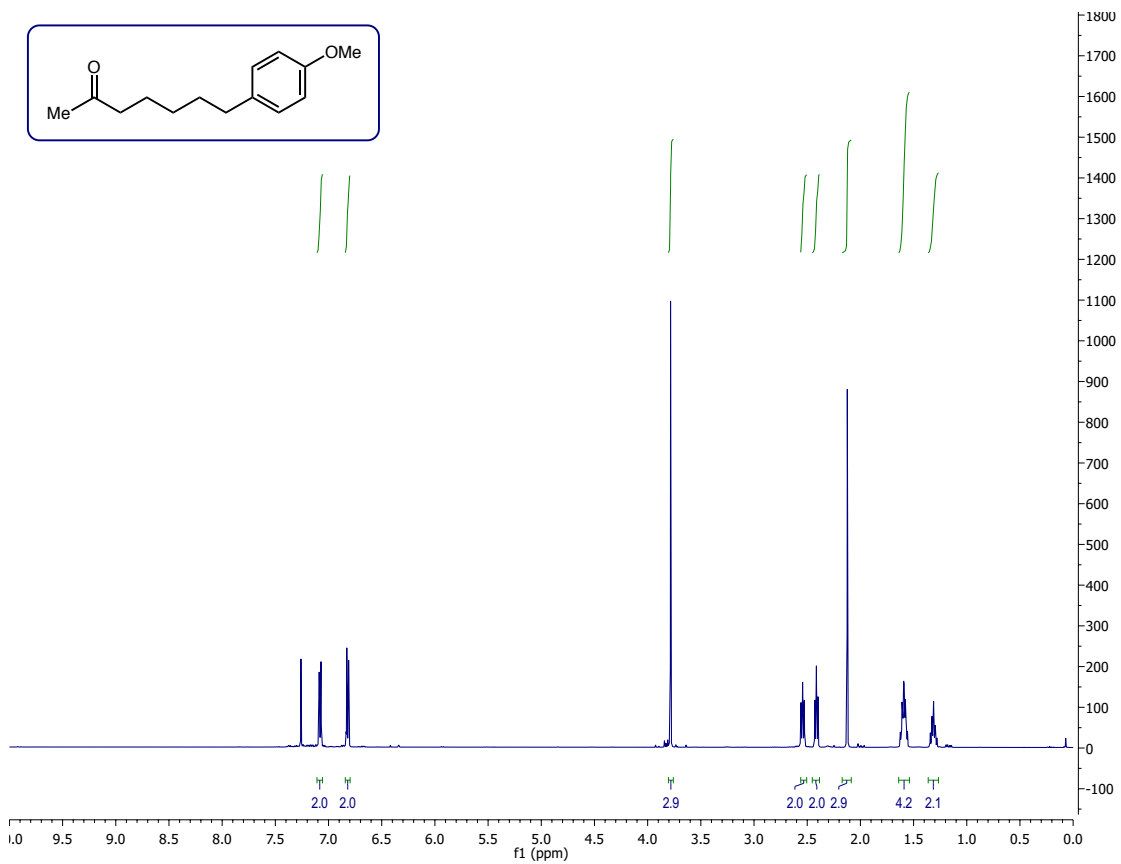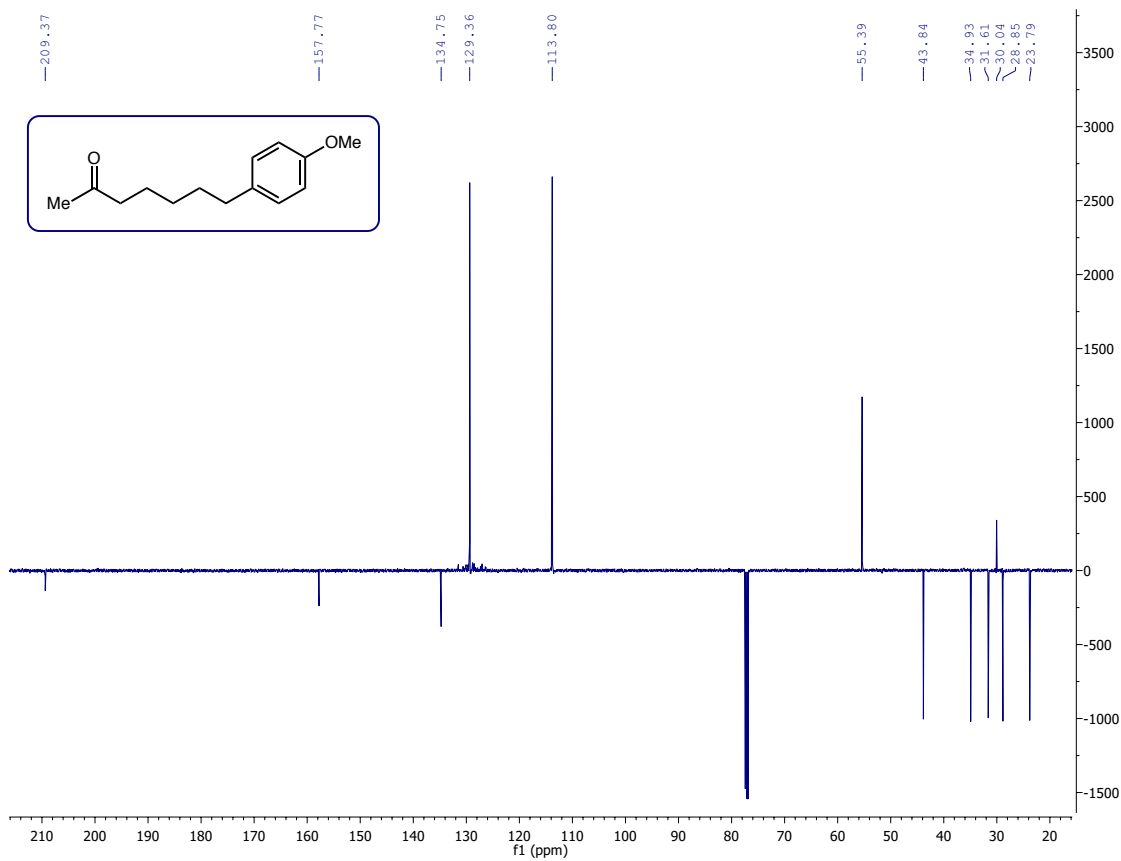

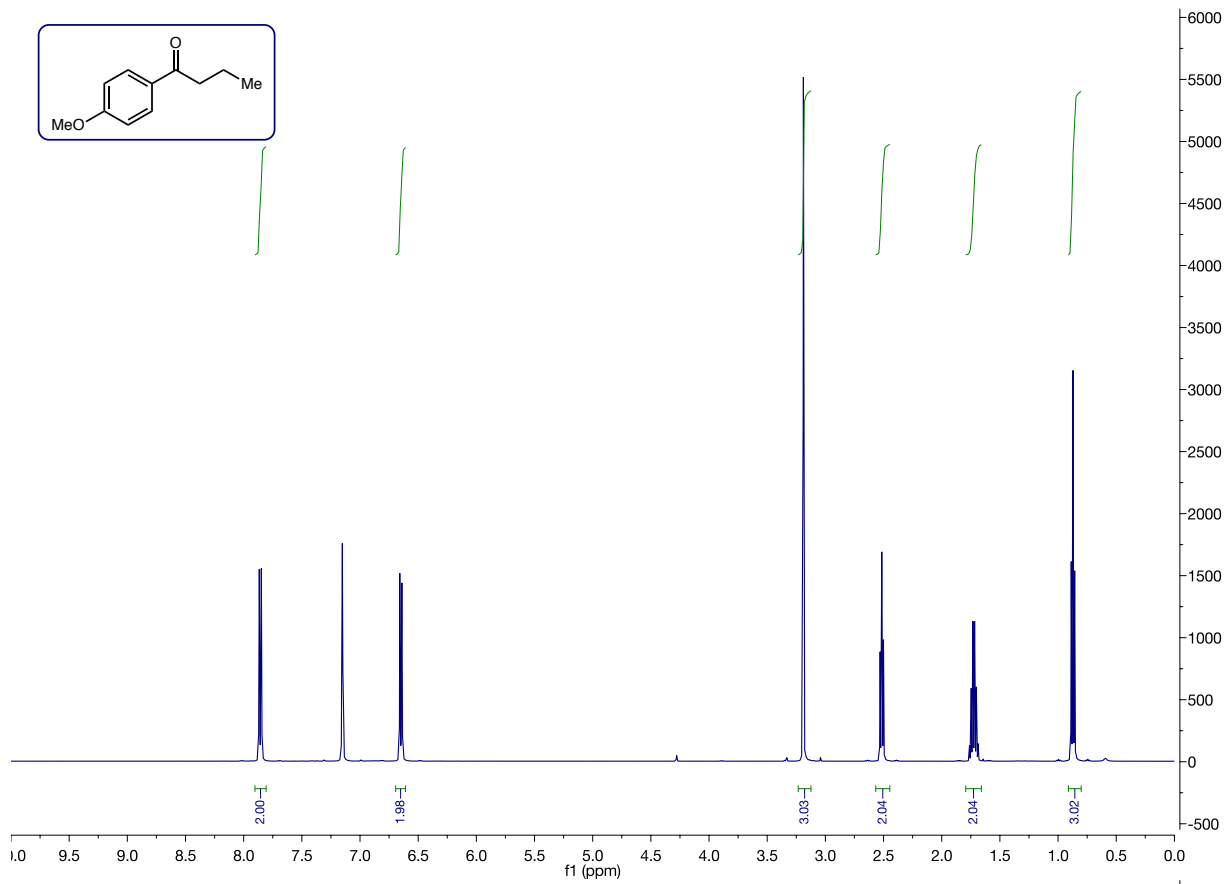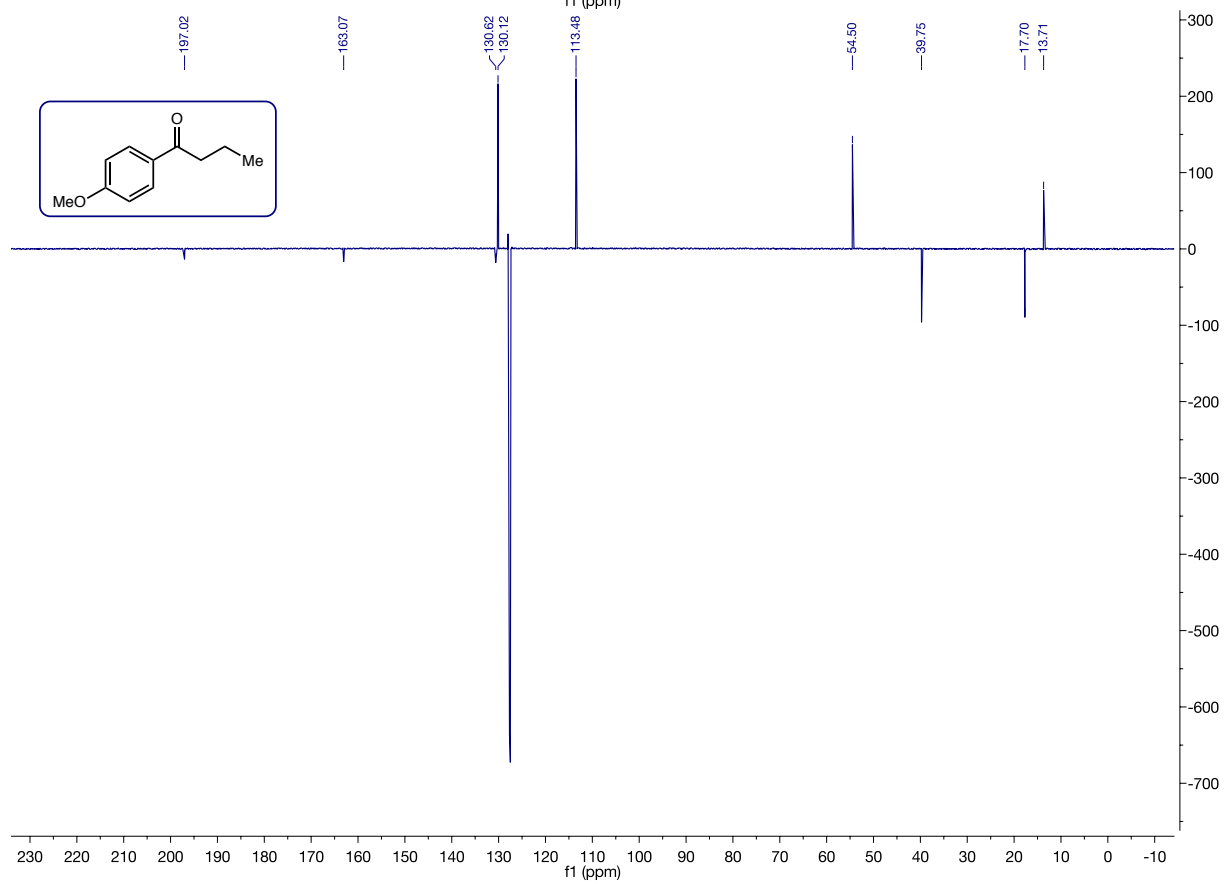

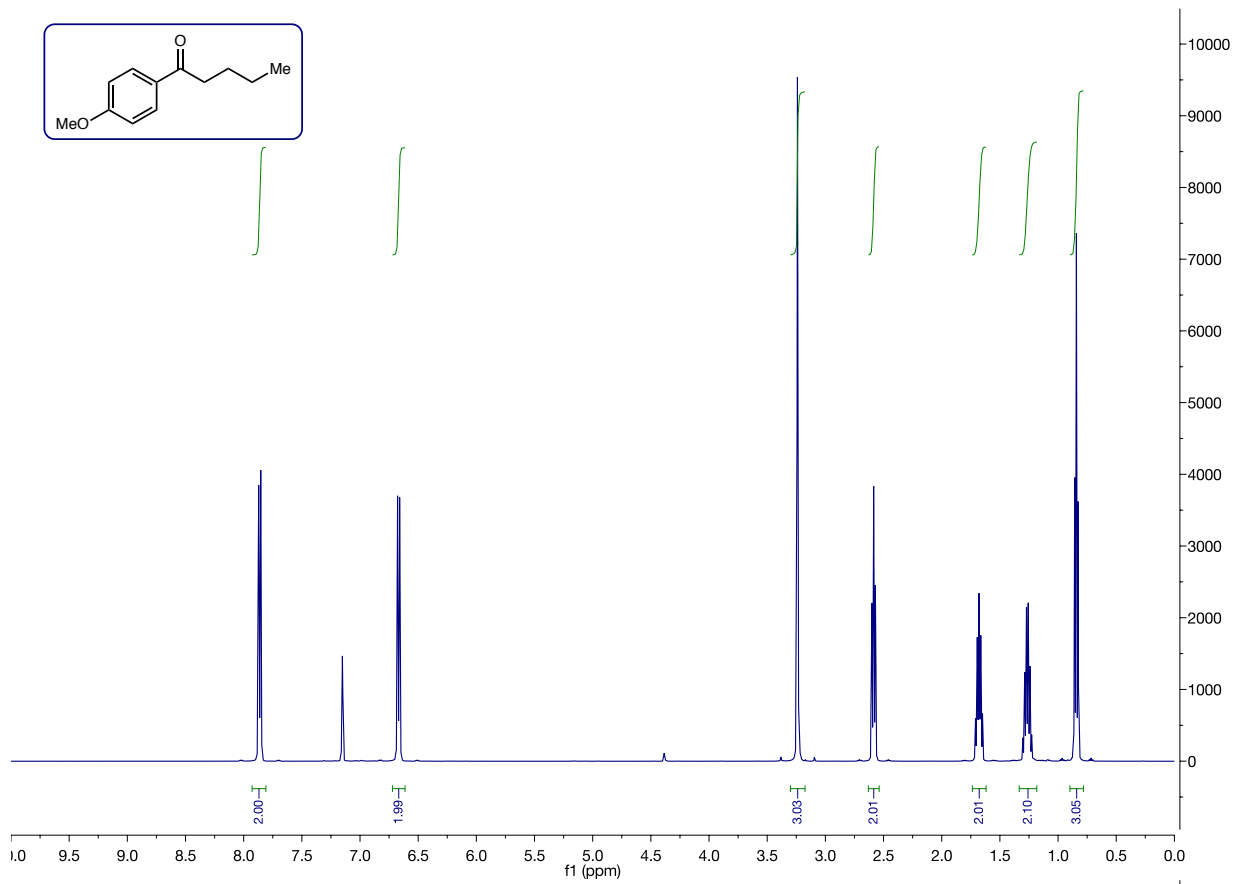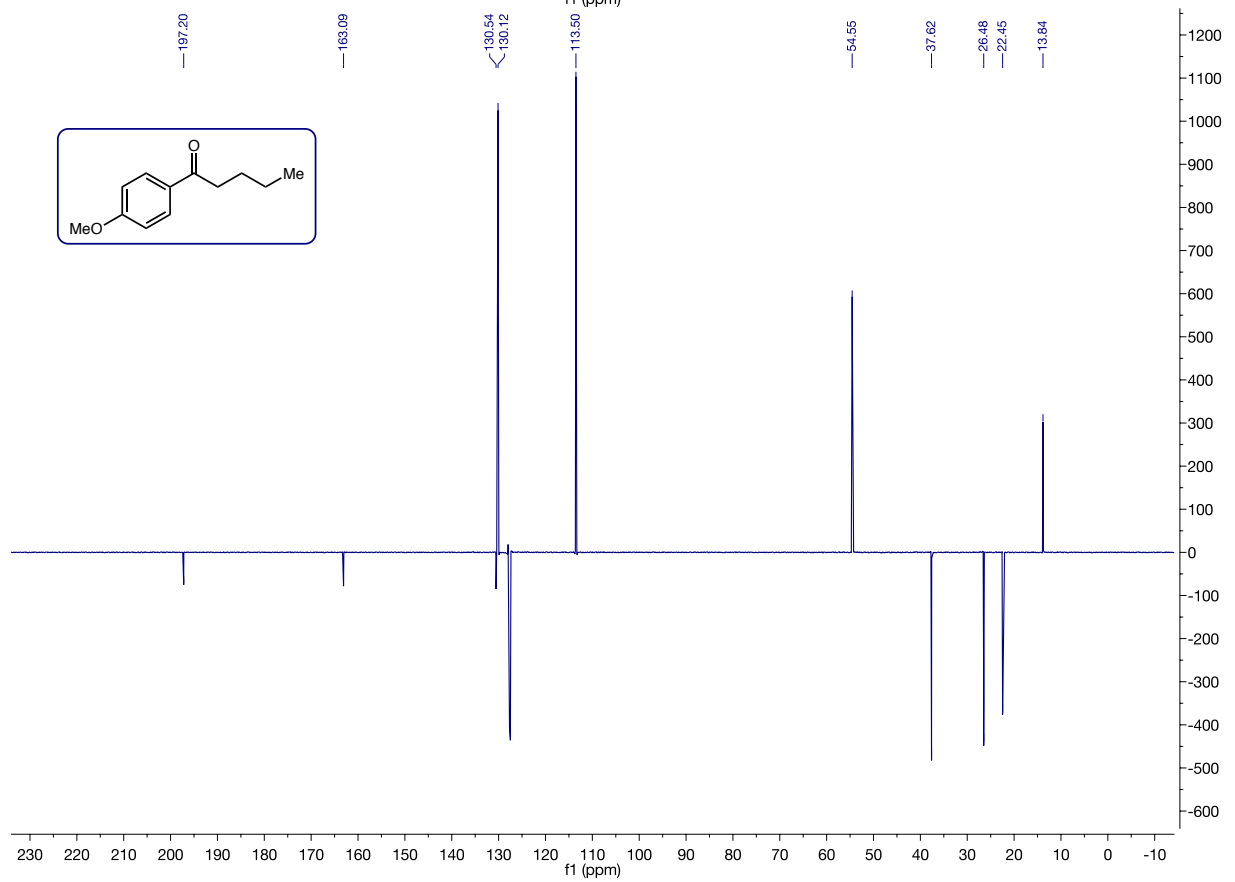



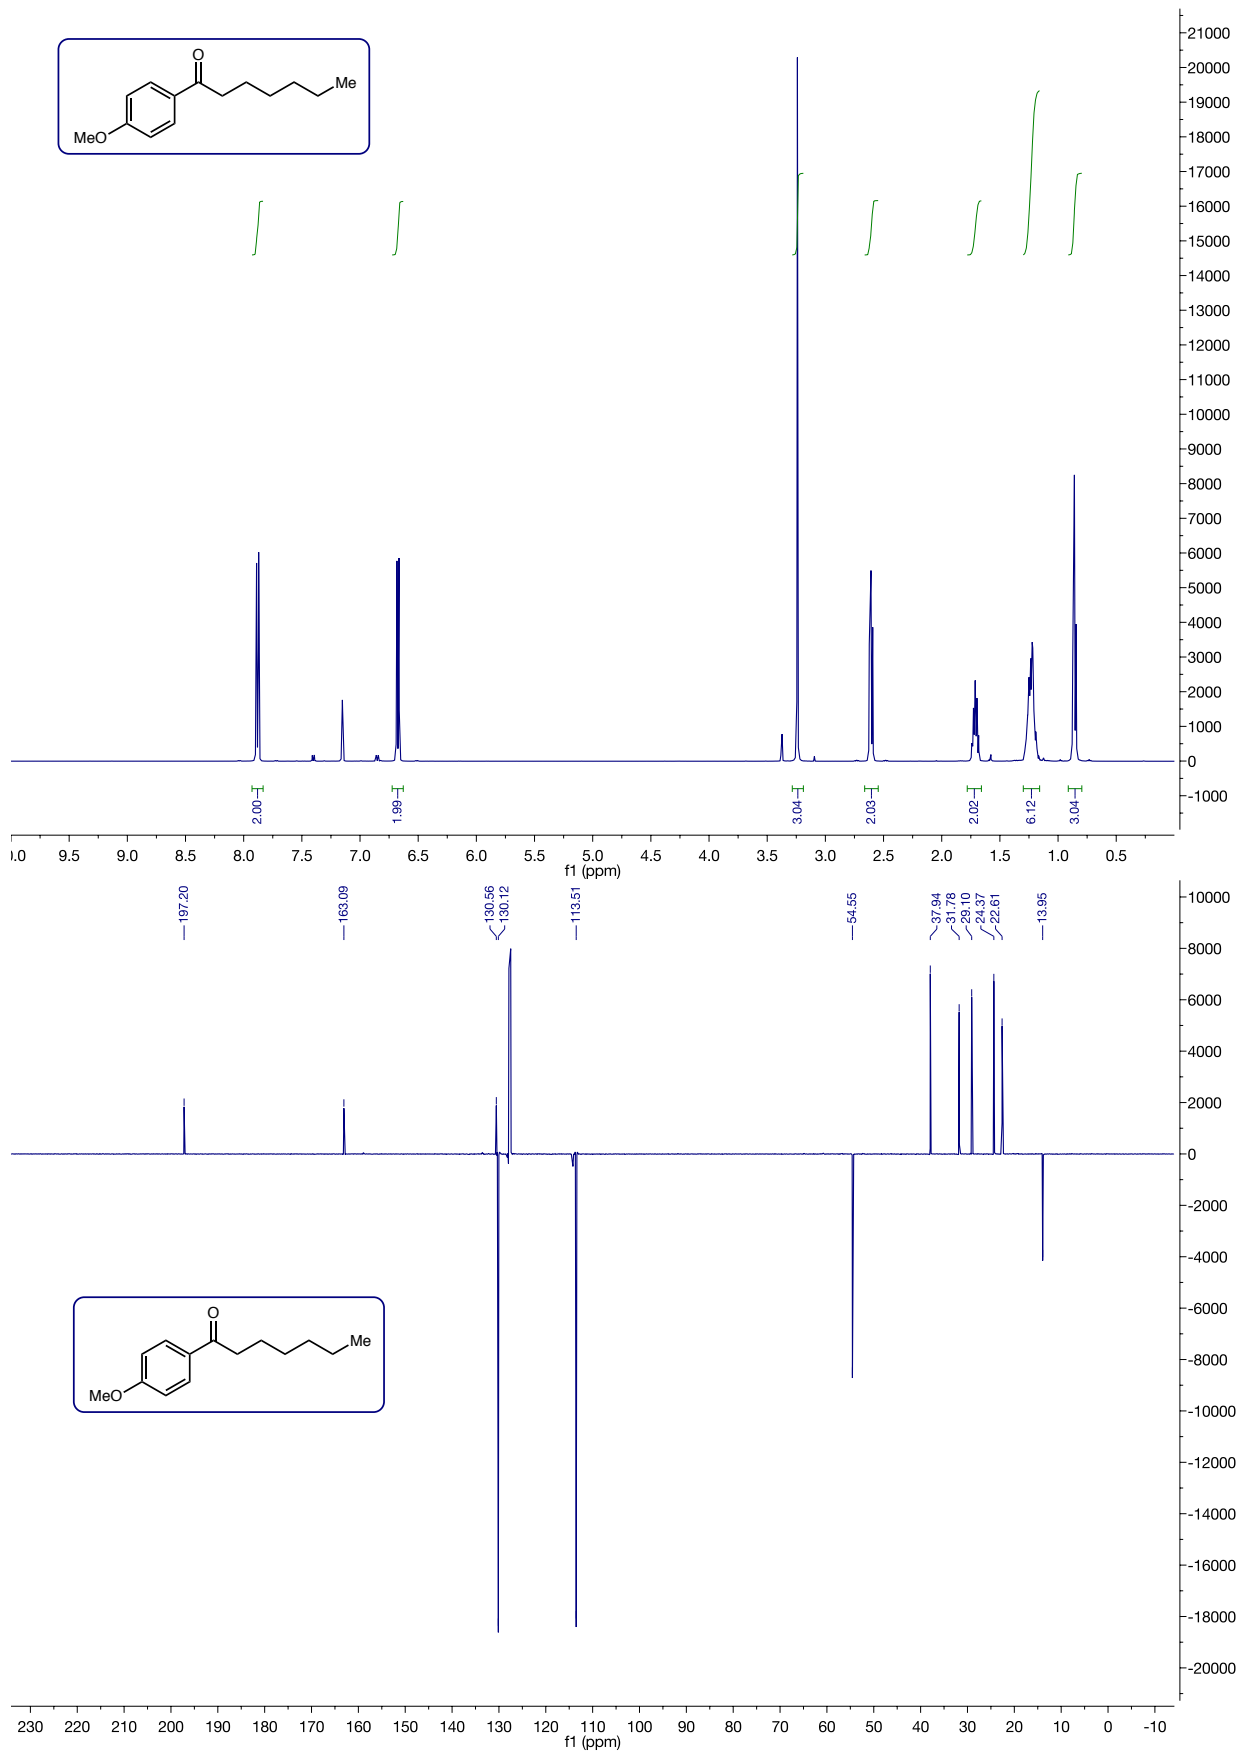

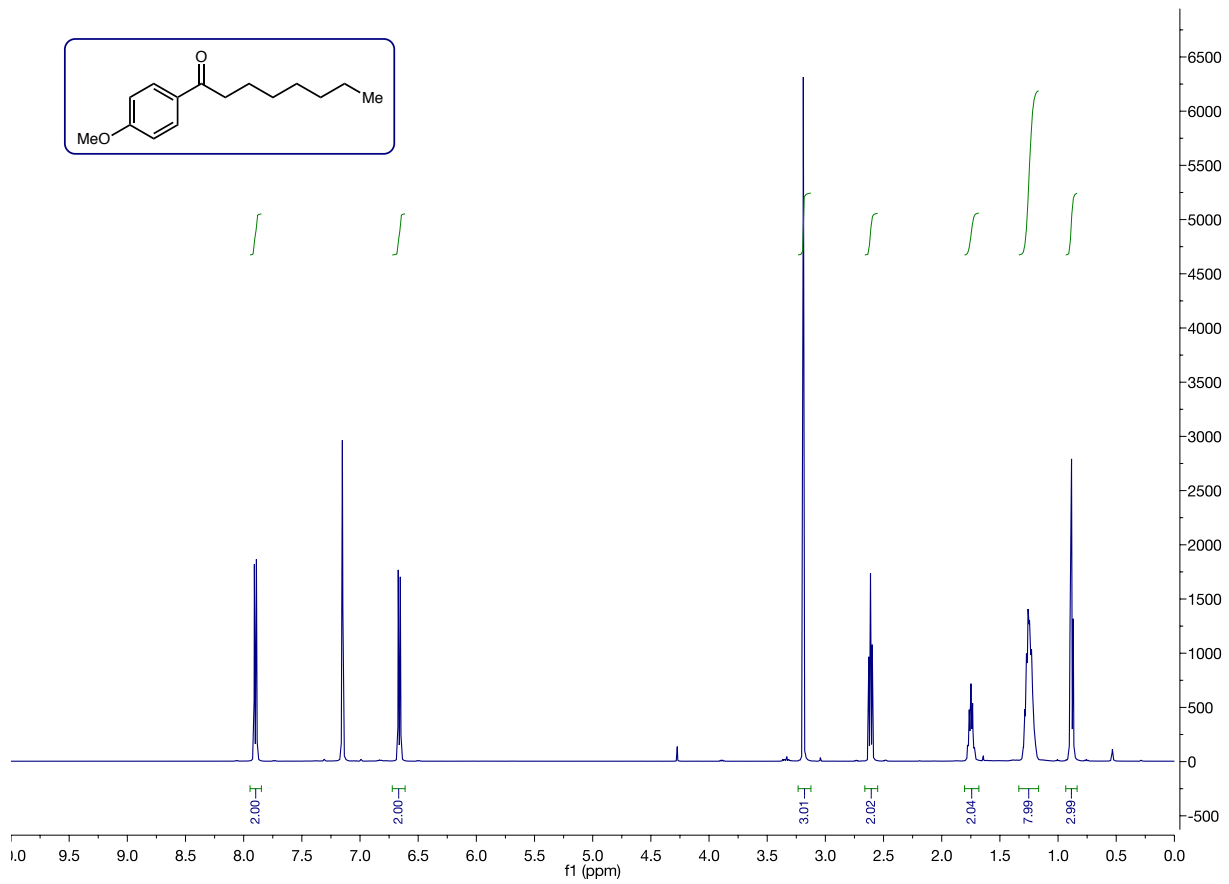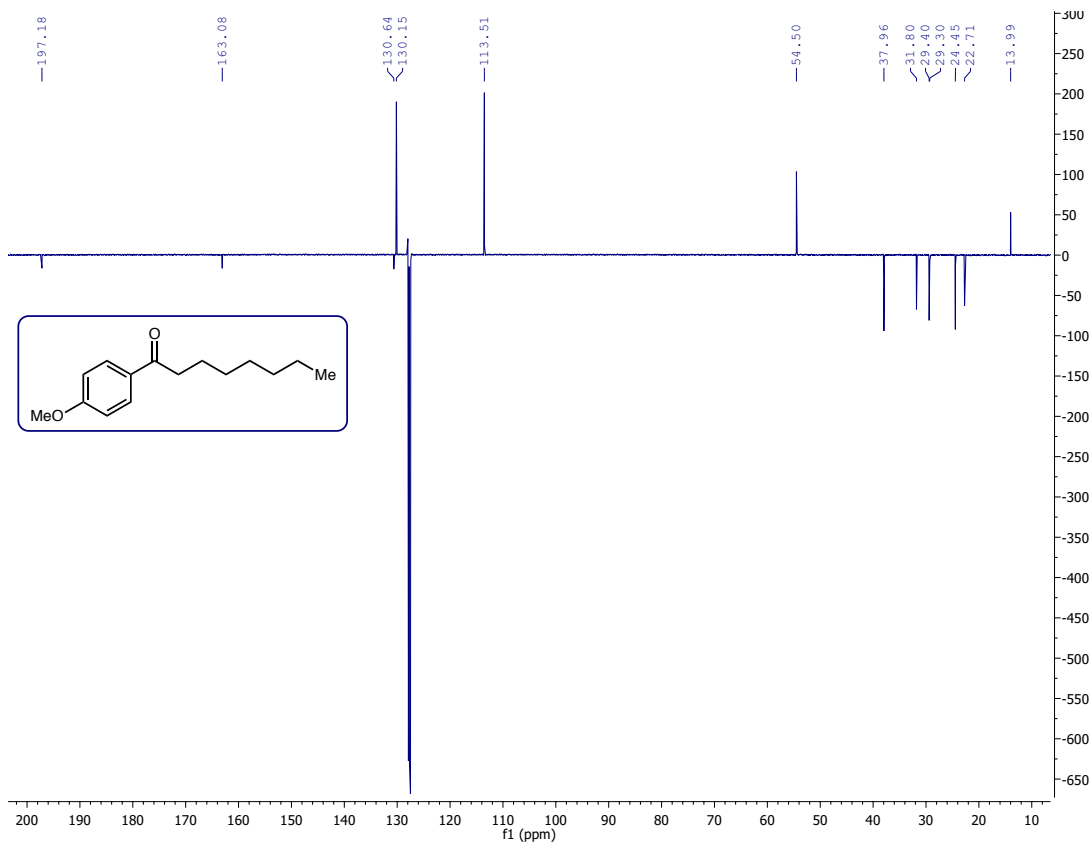

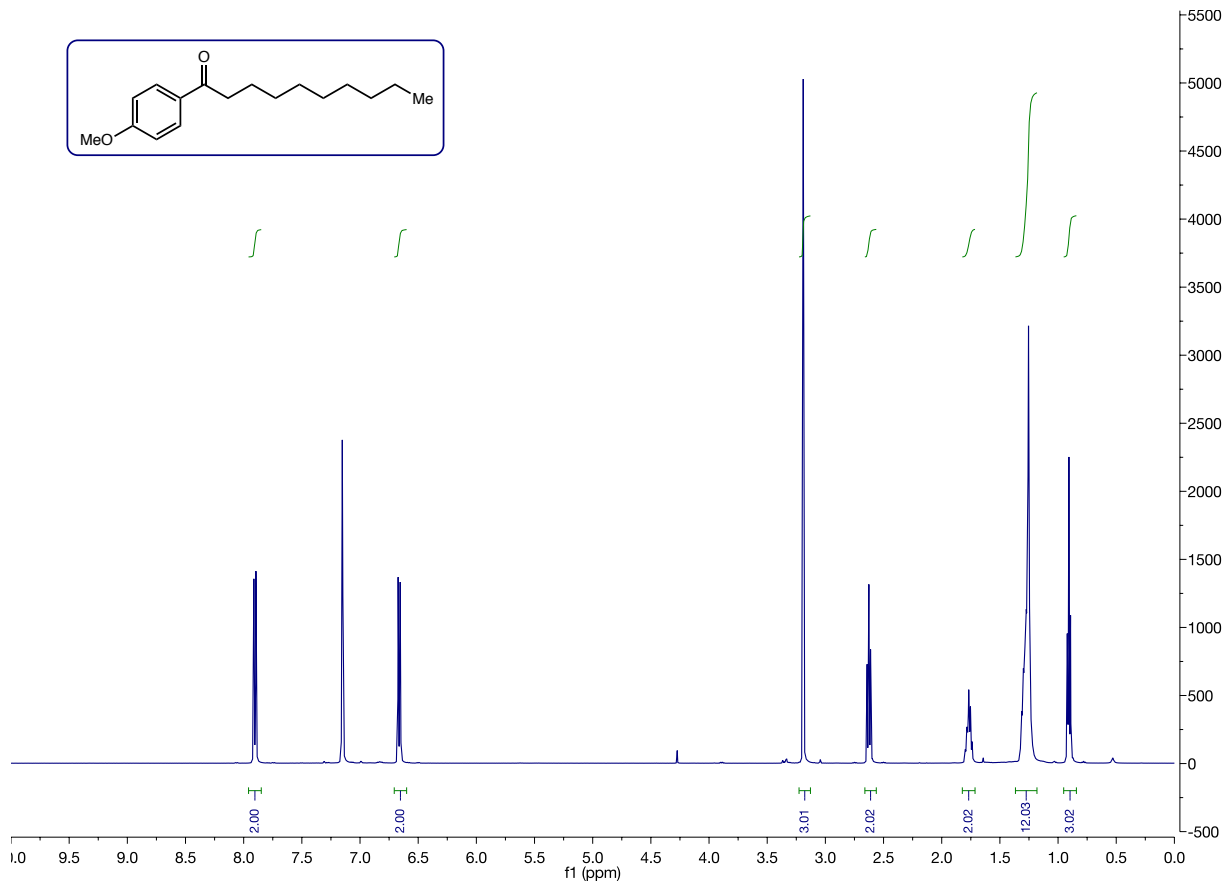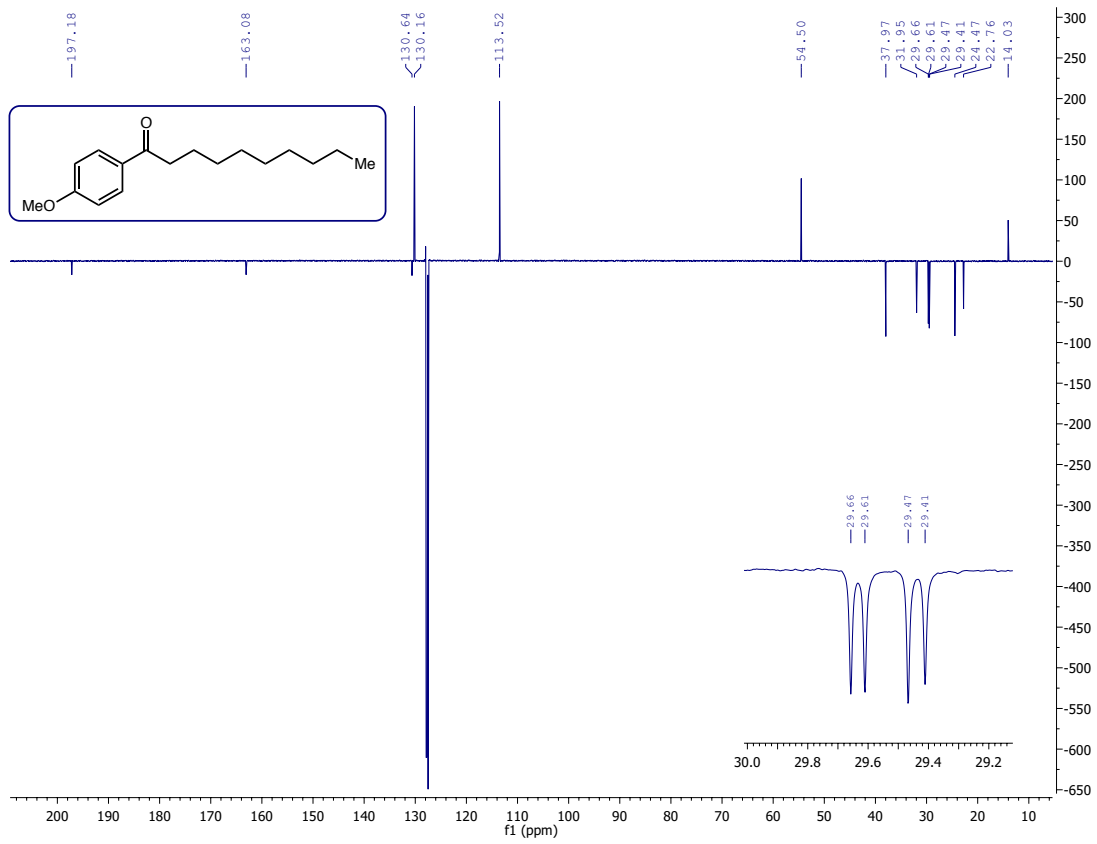

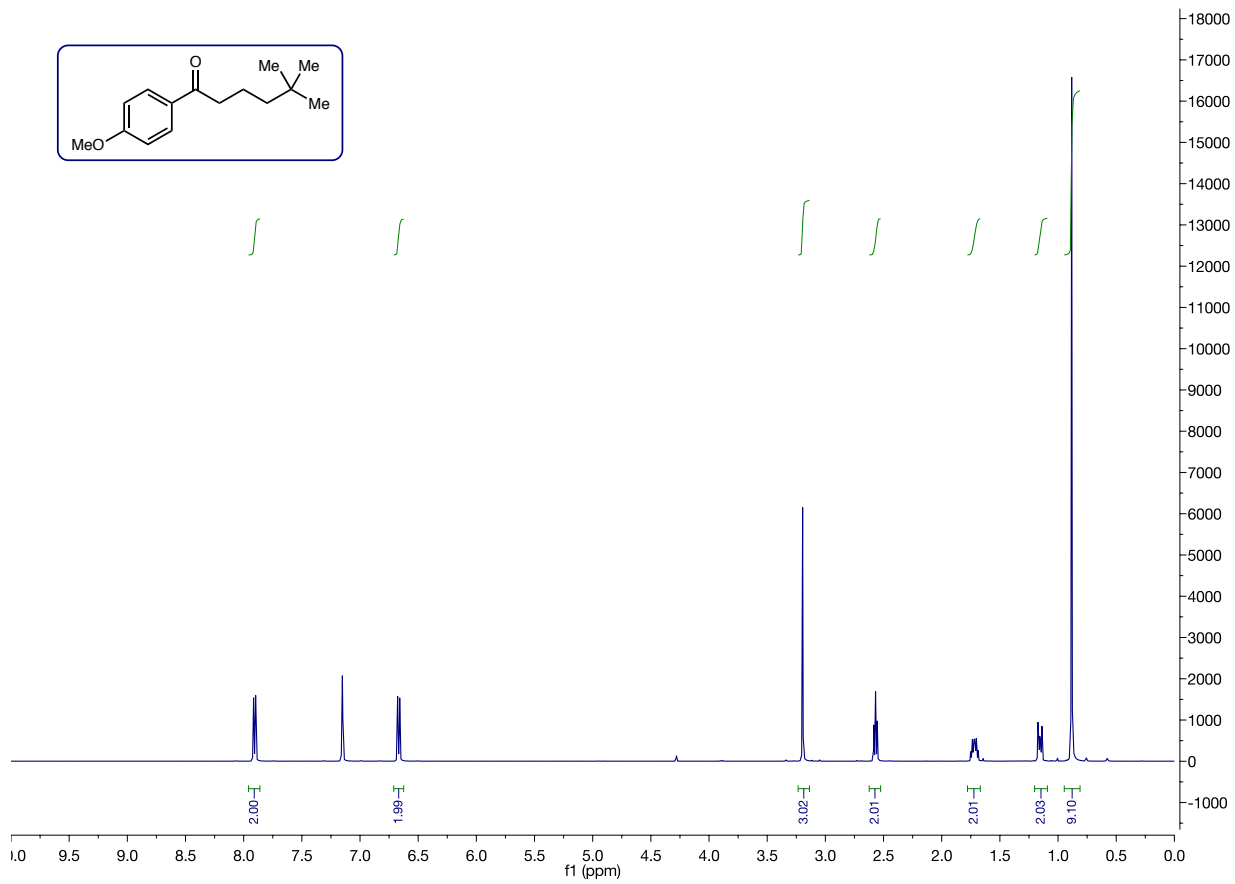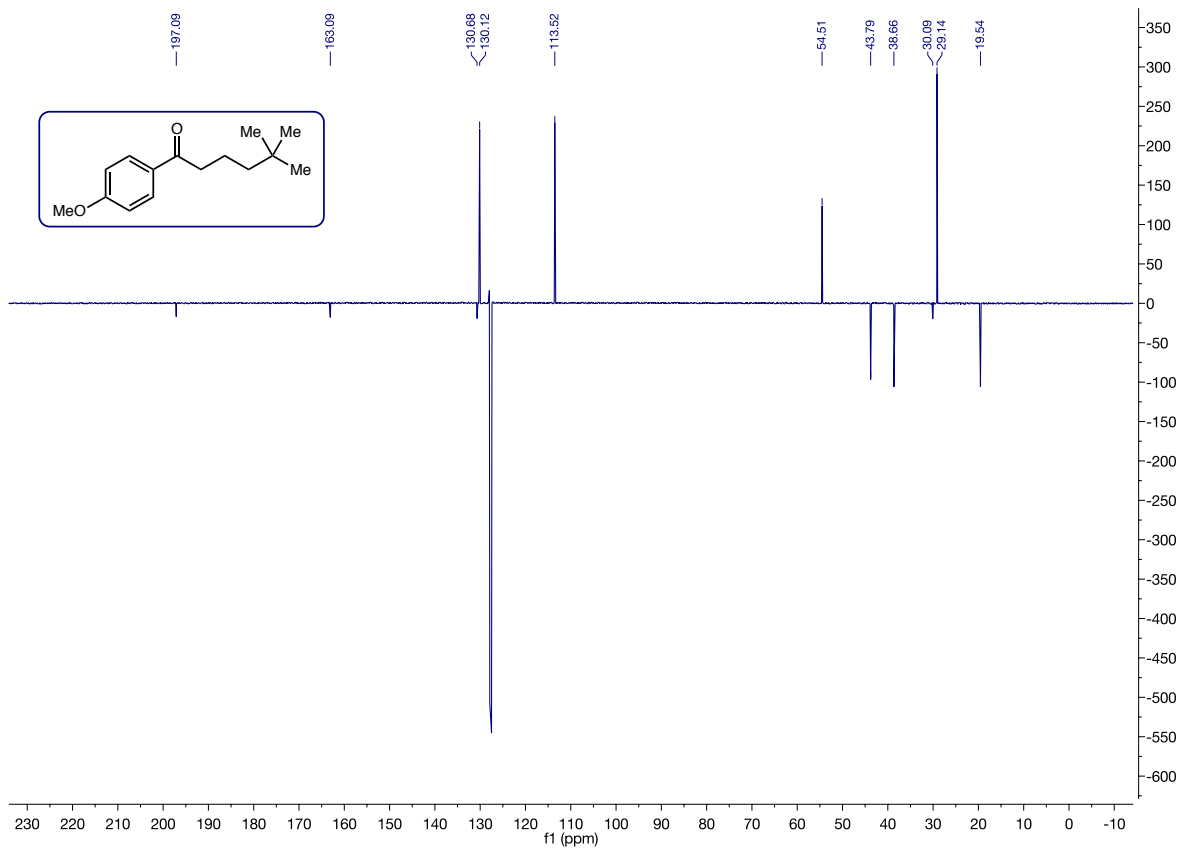

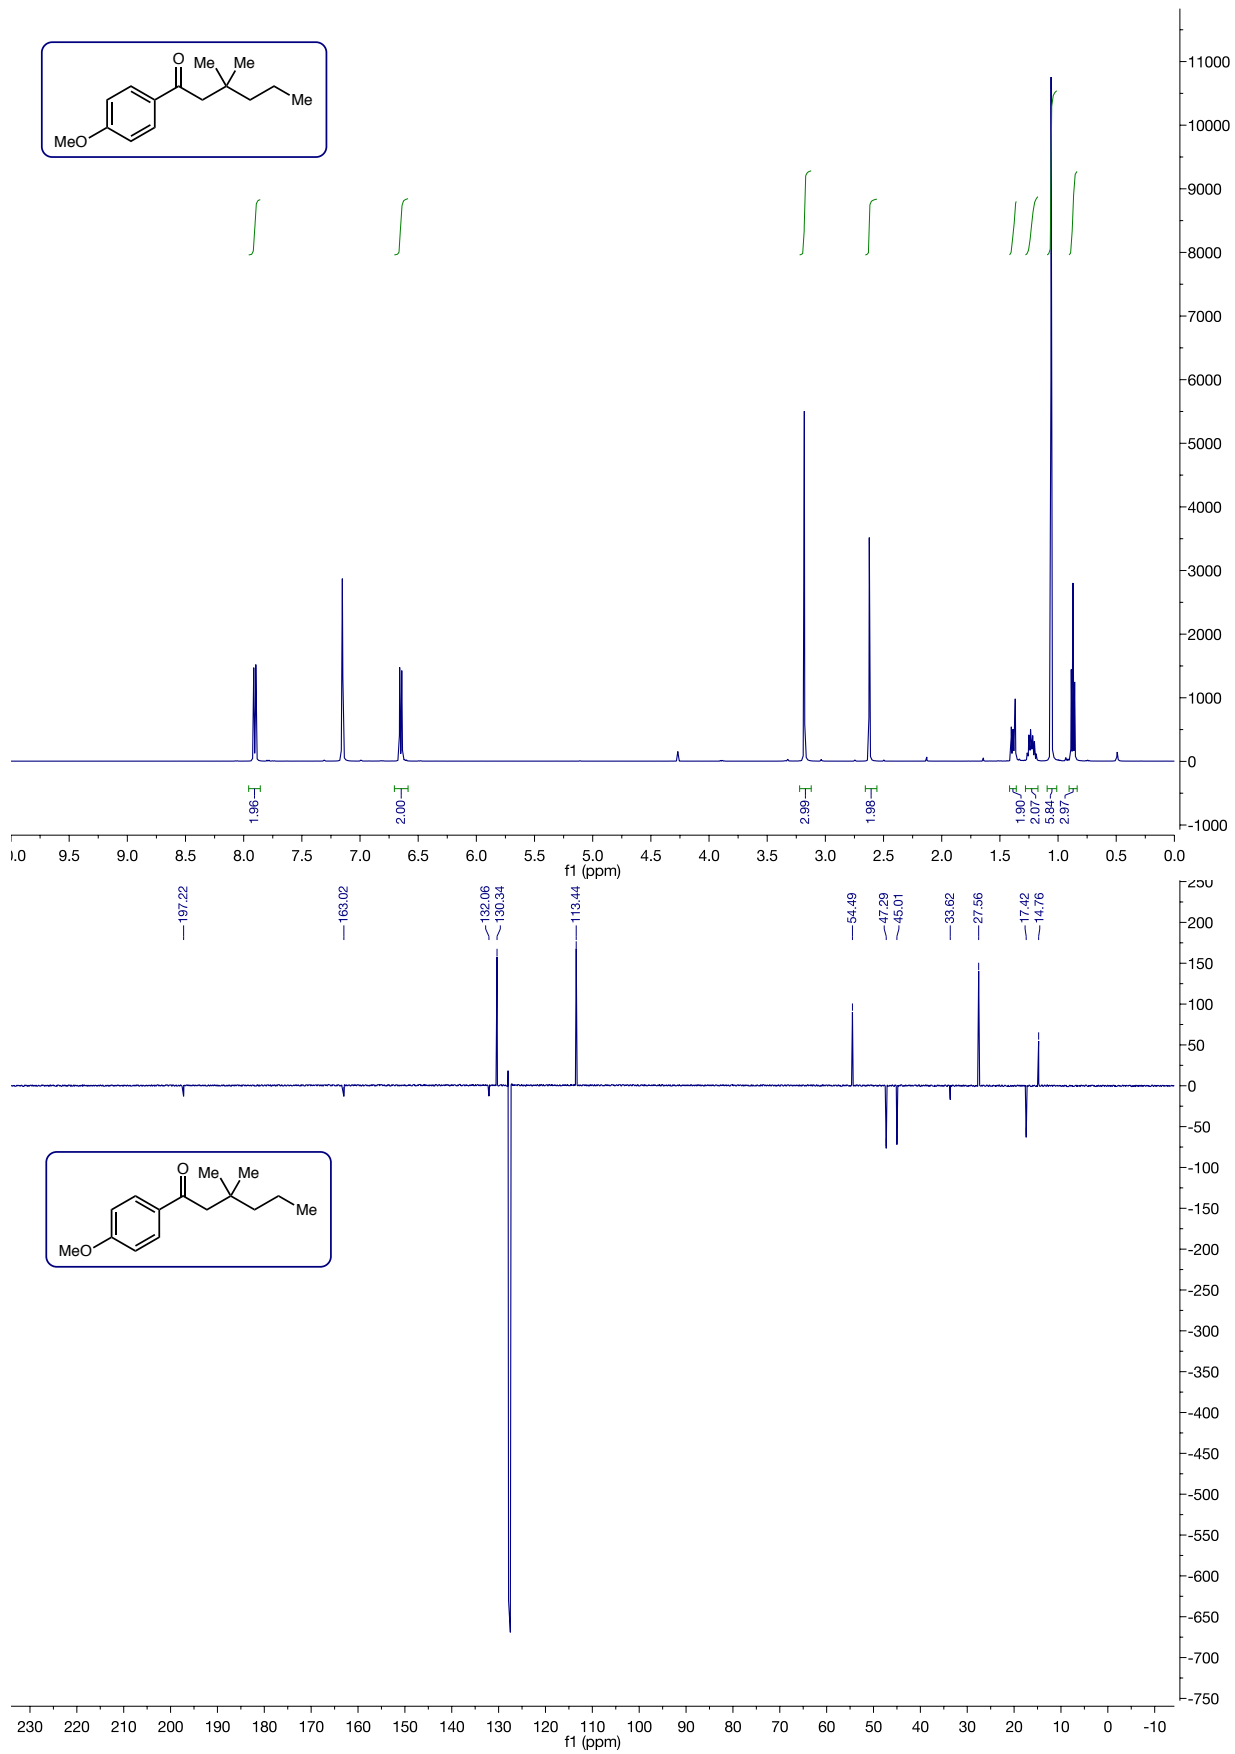

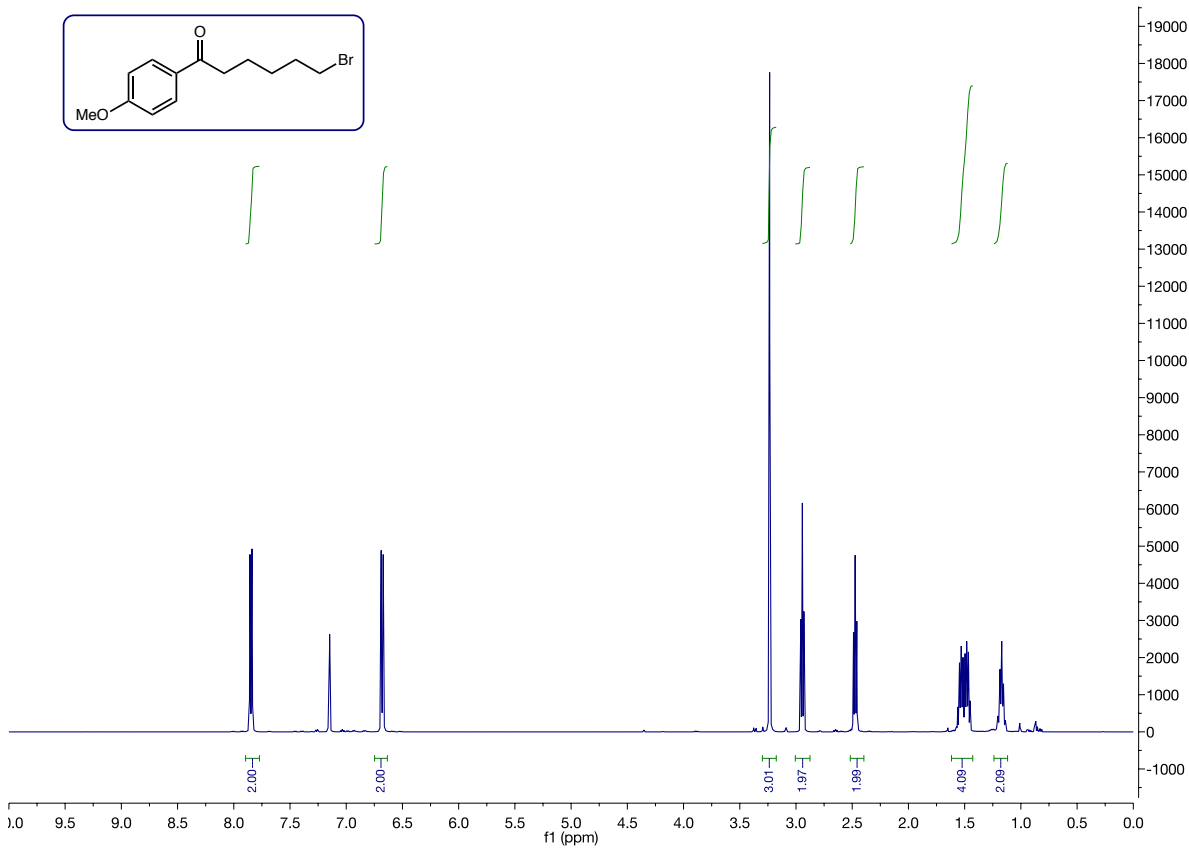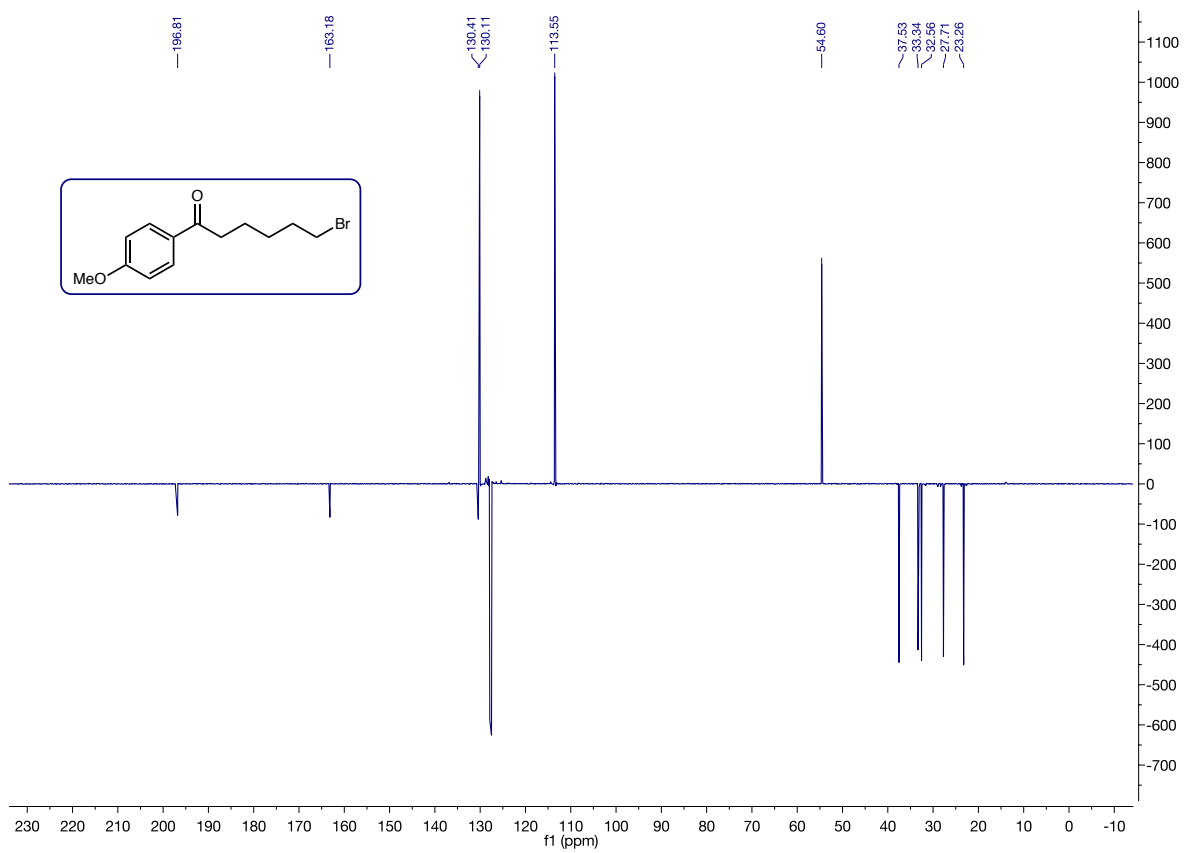

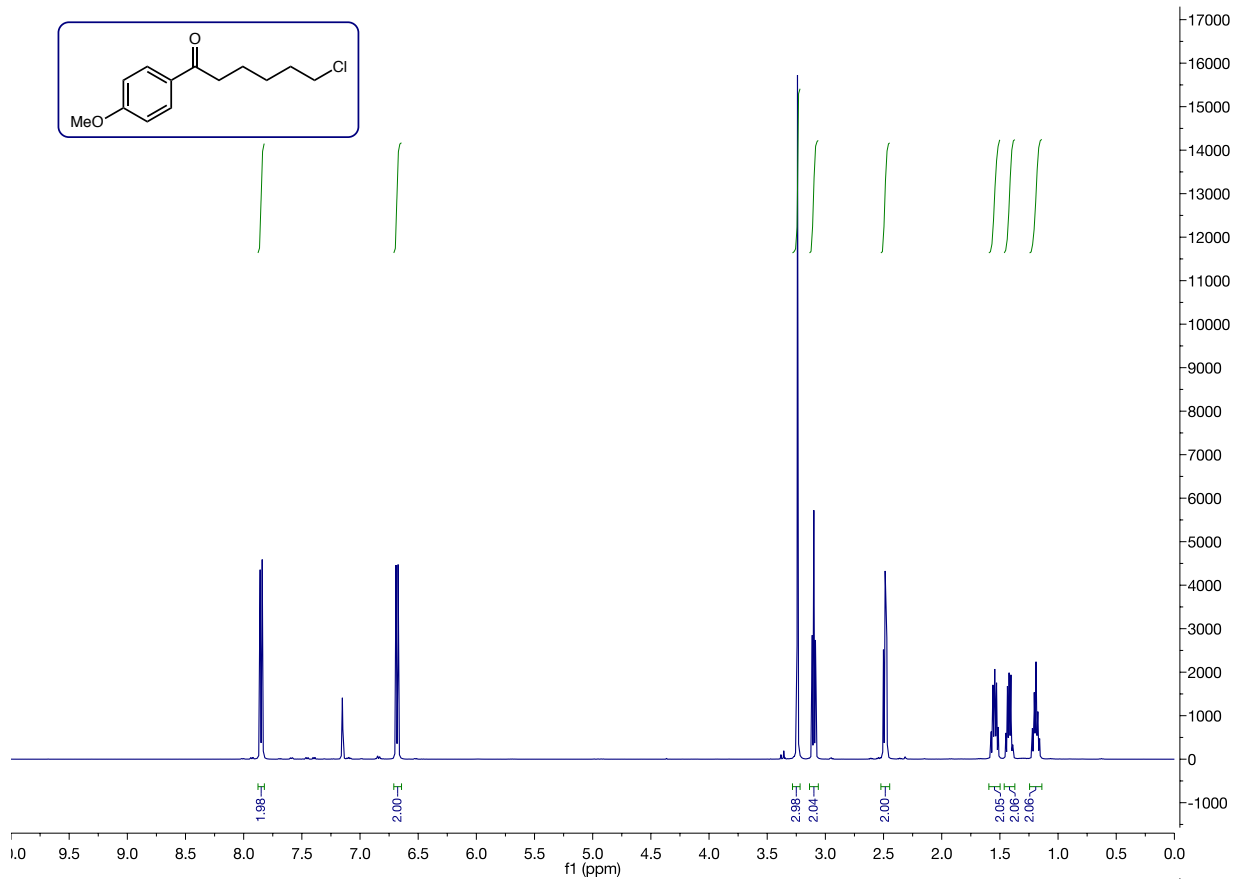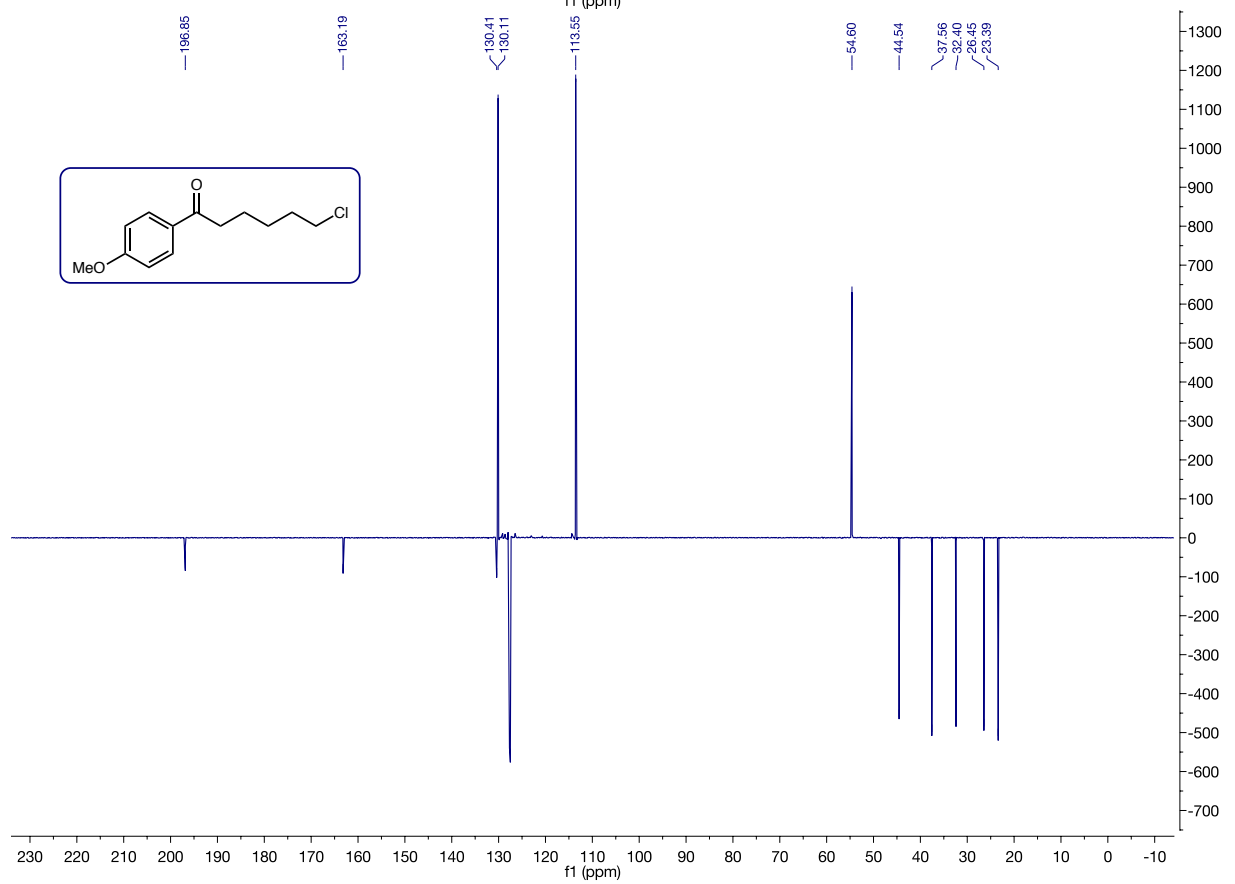

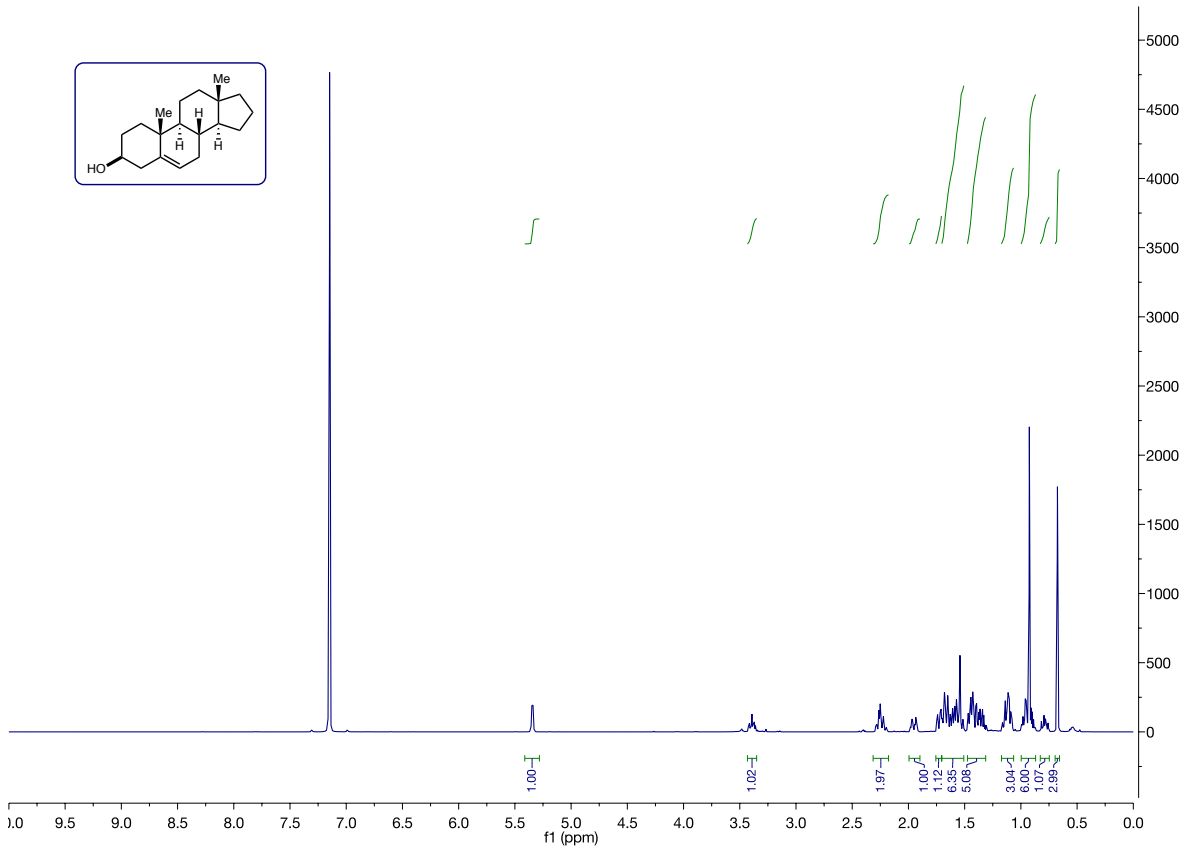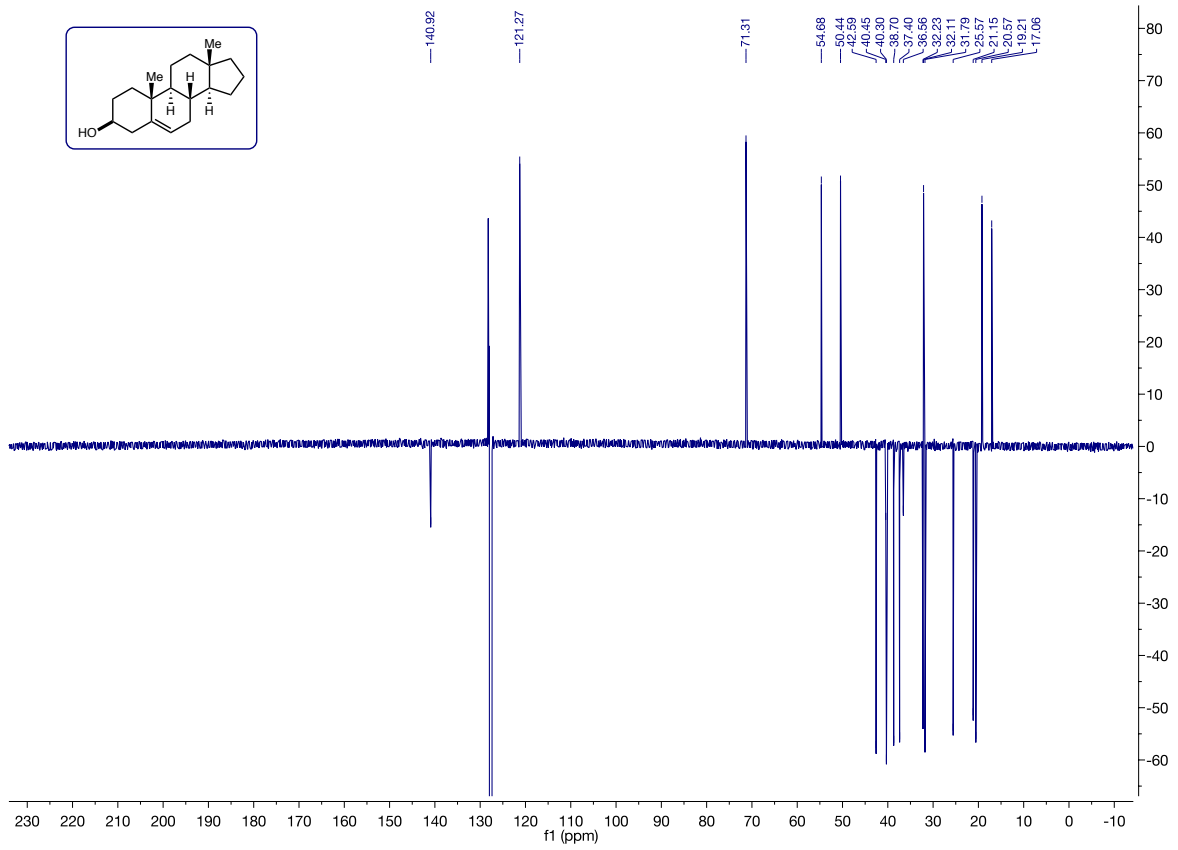



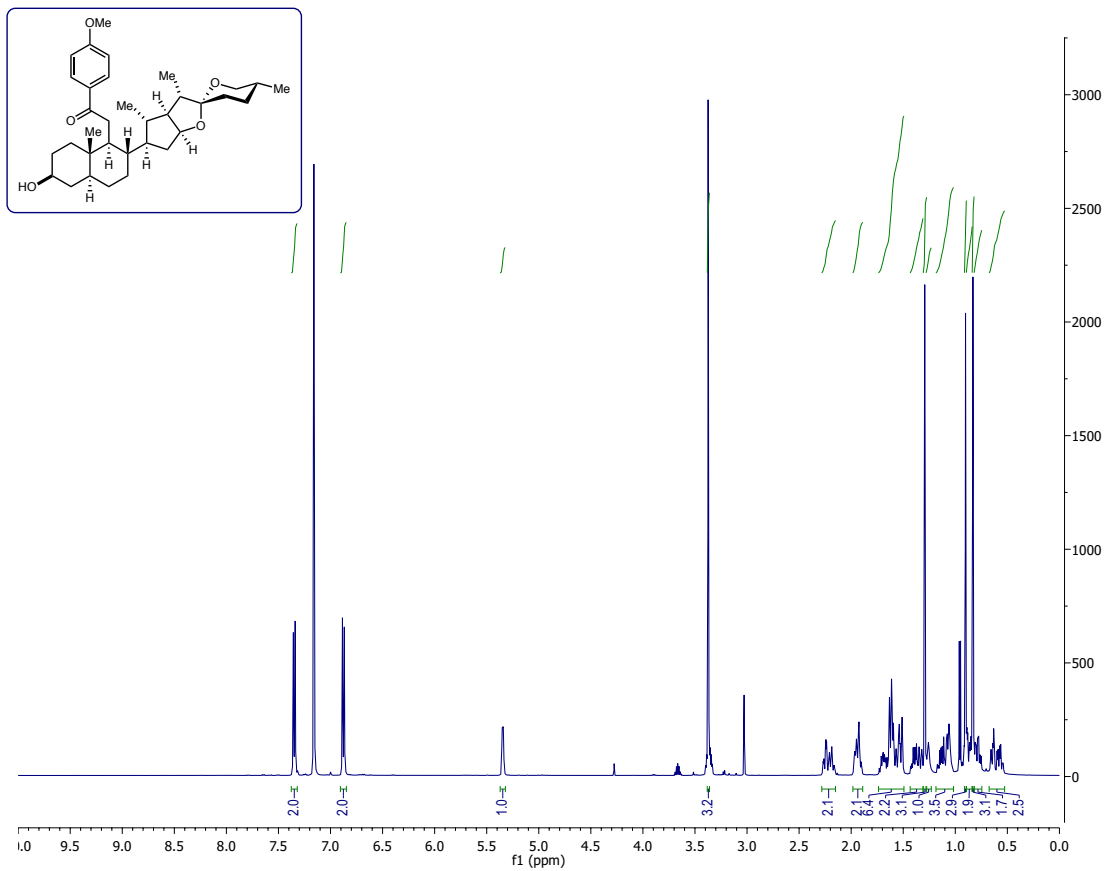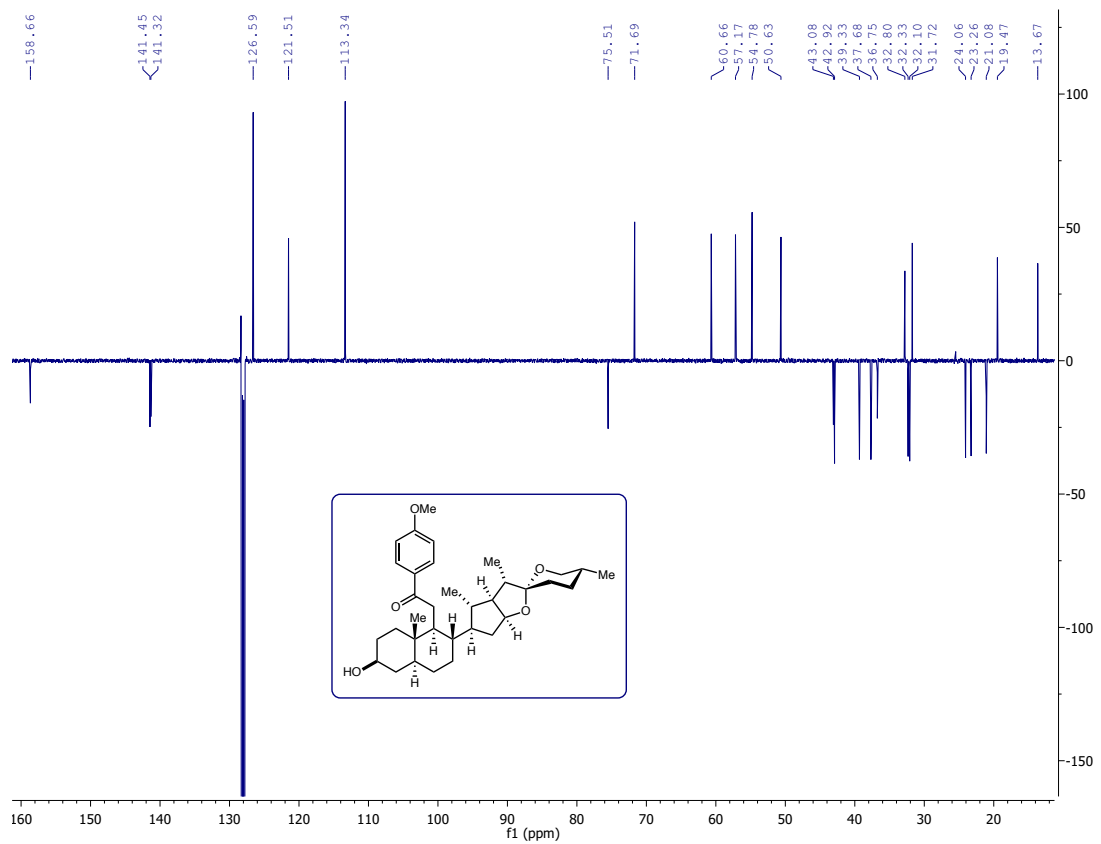

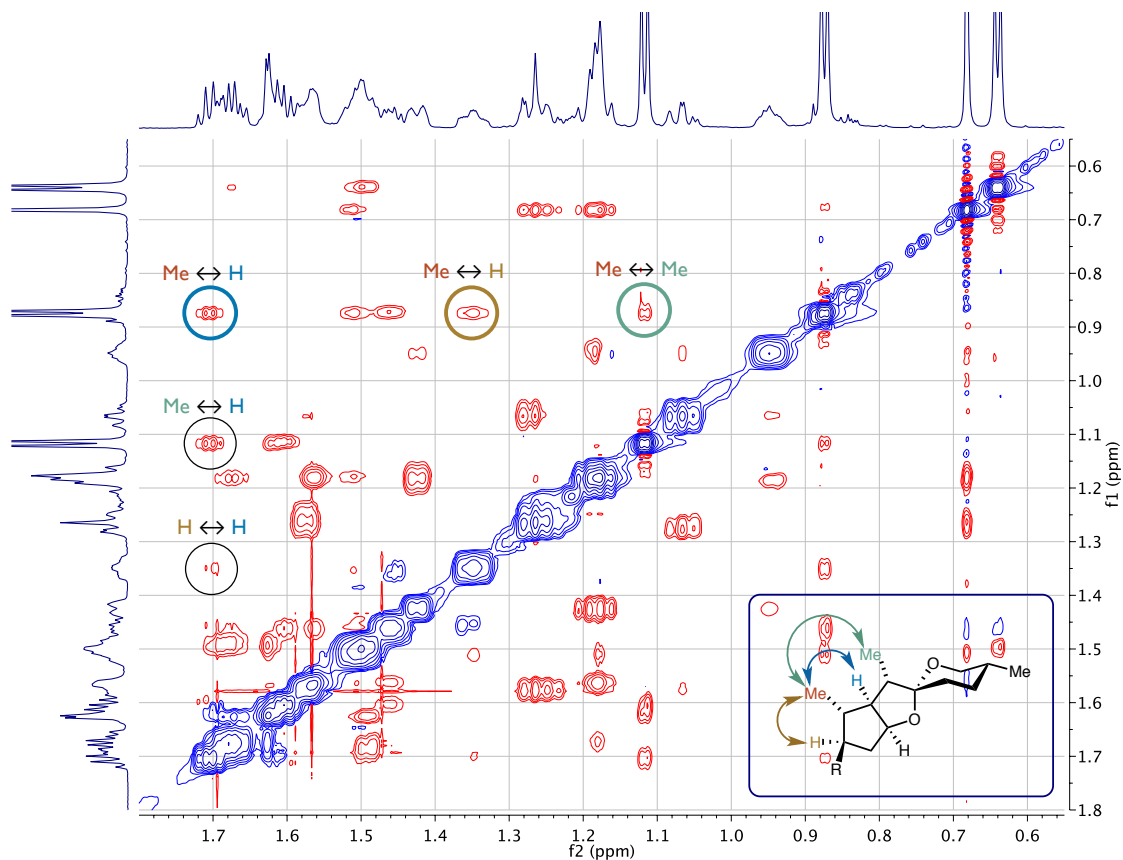

NOESY analysis of the *cis*-dimethyl product, annotated with important cross-peaks. Firstly, both methyls (**Me** and **Me**) show nuclear Overhauser effect to the center proton (**H**) of the same magnitude, signifying their similar spatial distance to **H**. Secondly, **Me** is observed to be spatially close to side proton (**H**), which is on the same face as the center proton **H**. Lastly, **Me** and **Me** also exhibits NOE against each other. This evidence, taken together, was determined to indicate that the two methyl groups in the major isomer are in a *cis* conformation.

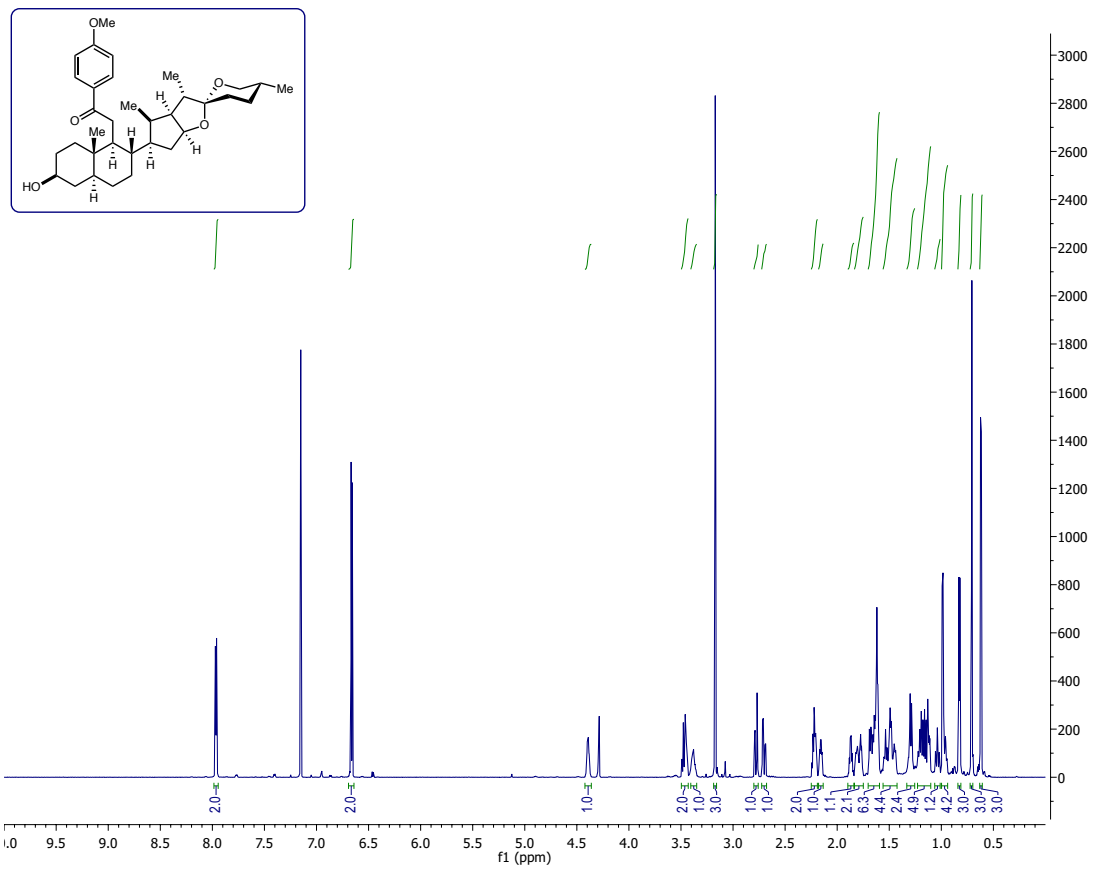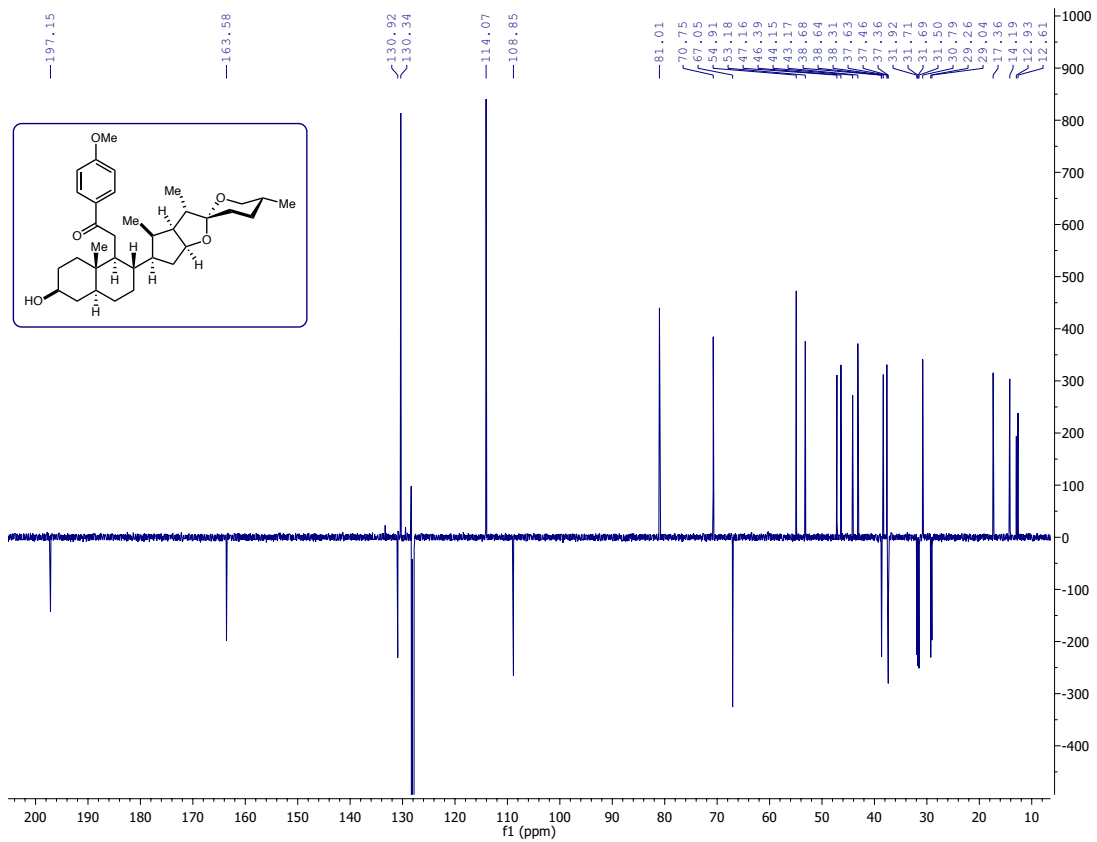

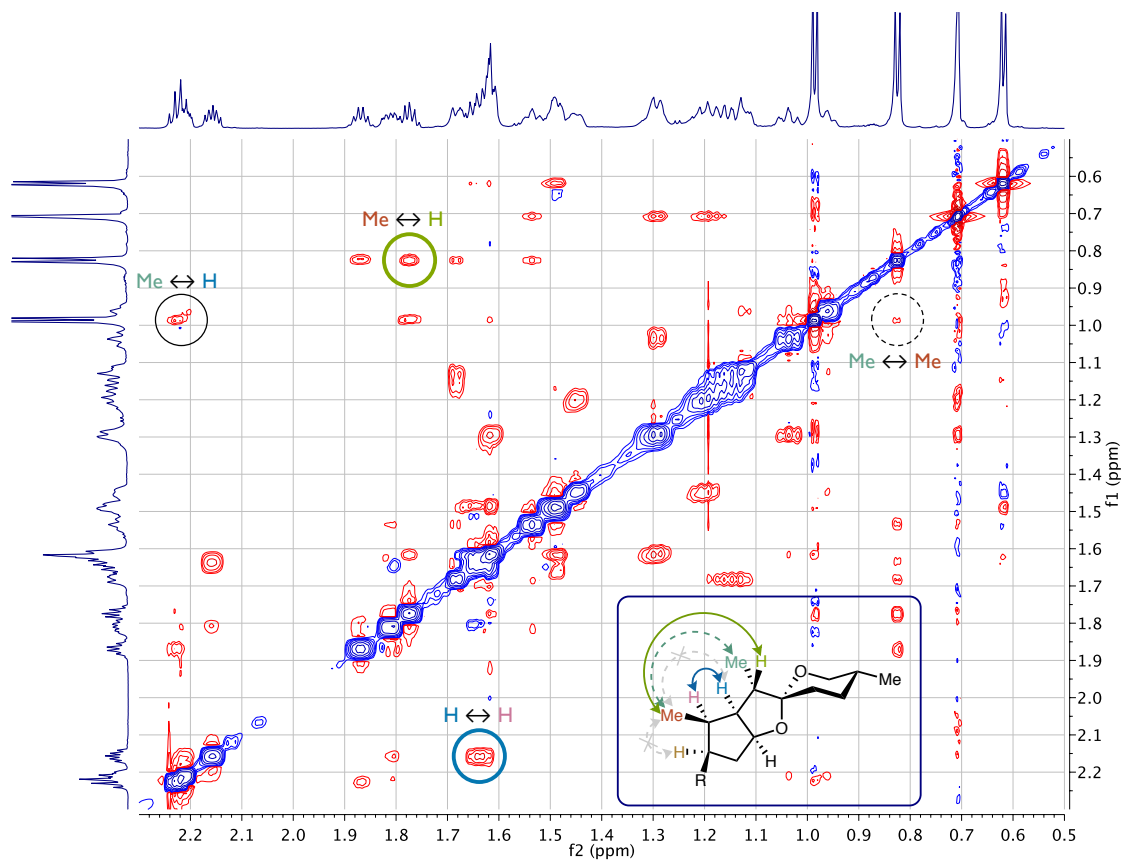

NOESY analysis of the *trans*-dimethyl product, annotated with important cross-peaks. Firstly, comparing against the NOESY of the *cis* isomer, it is noted that there is only one methyl, namely the distant Me, in close contact with the center proton H. Secondly, the geminal proton H of Me is now proximal to the central H. Thirdly, a significantly weaker NOE is observed between Me and Me. Rather, Me shows strong NOE to the geminal proton H of the distant Me. This evidence suggests a *trans* conformation for this minor isomer.

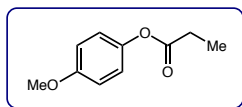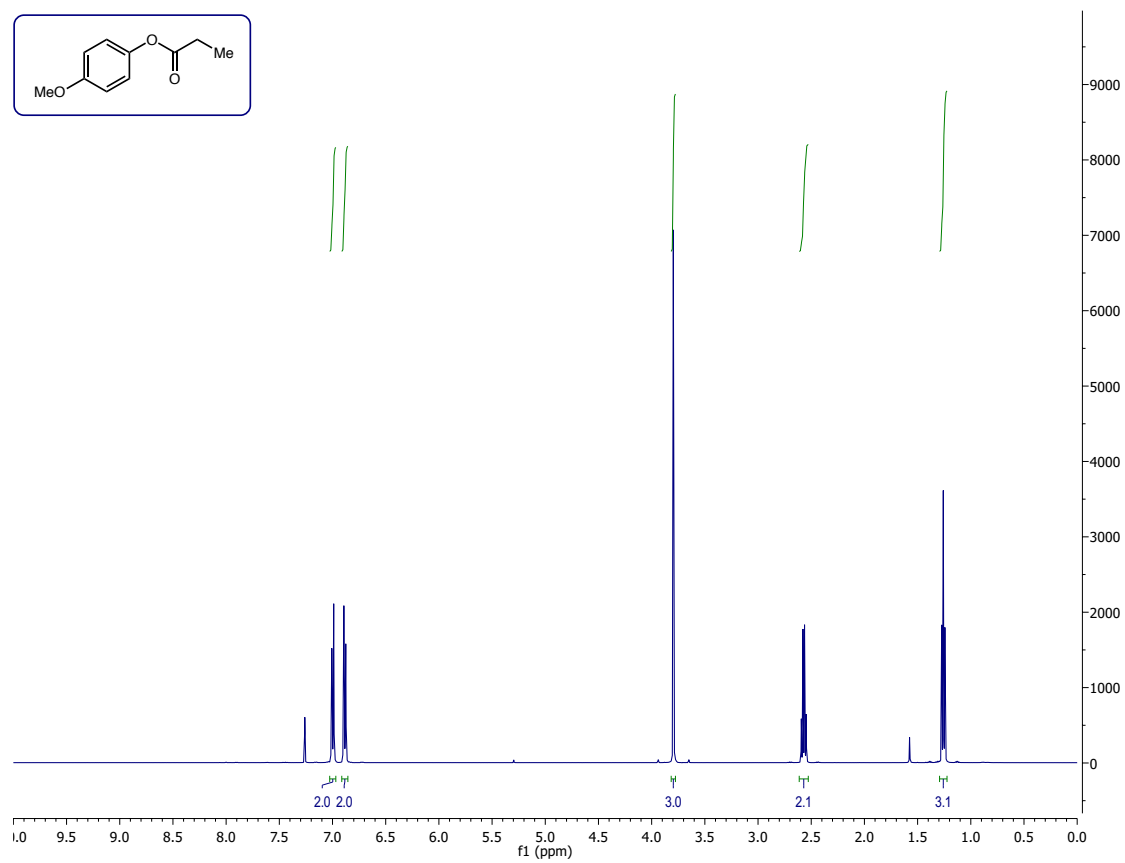

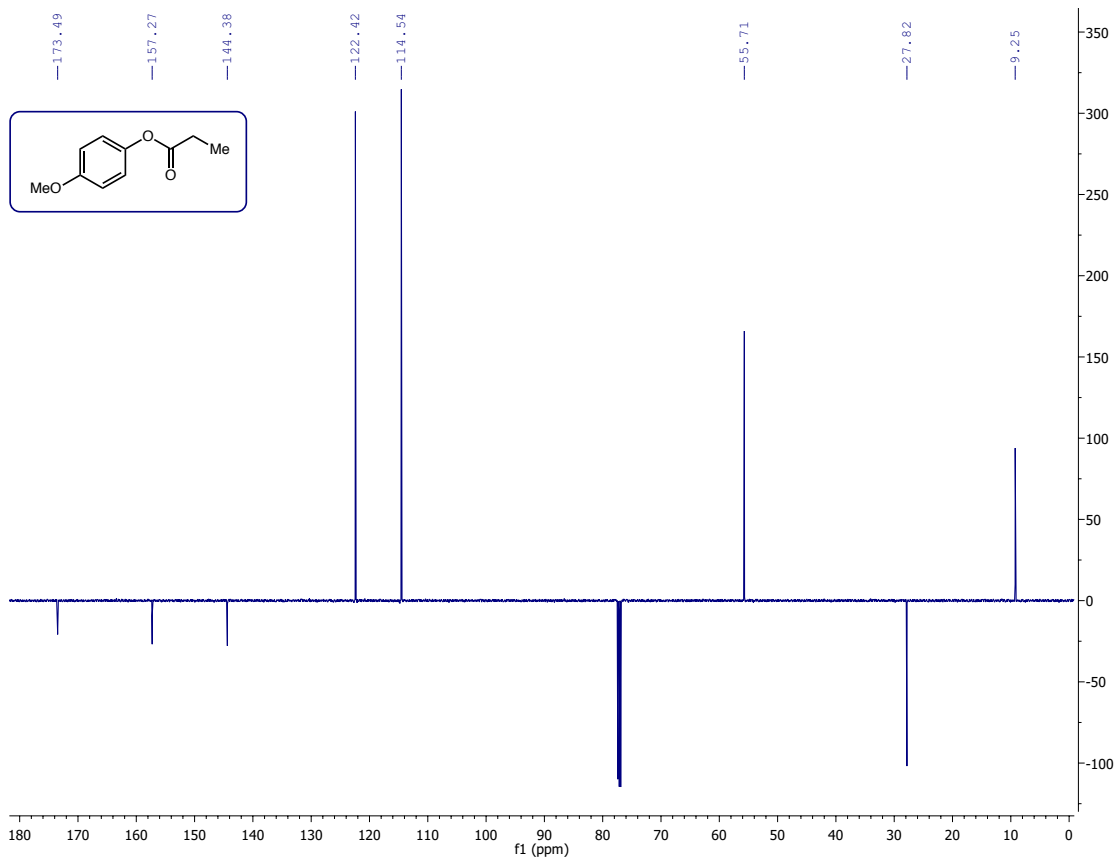

## Stern-Volmer Studies

Stern-Volmer experiments tracking the quenching of the phosphorescence of  $[\text{Ir}(\text{dF}(\text{CF}_3)\text{ppy})_2(5,5'\text{-d}(\text{CF}_3)\text{bpy})](\text{PF}_6)$  (**C**) were conducted on an Agilent Cary Eclipse Fluorescence Spectrophotometer using the Cary Eclipse Scan Application. Fresh stock solutions of Ir photocatalyst **C**, 1-(4-methoxyphenyl)cyclooctan-1-ol (SM), and collidine were prepared in  $\text{CH}_2\text{Cl}_2$  and mixed together at varying concentrations in volumetric flasks. All liquid transfers were done in the glovebox. The solutions were loaded into quartz cuvettes, sealed under inert atmosphere, and shielded from light exposure before sample collection. The samples were irradiated at 440 nm, and three-scan average emission intensities at 586 nm were recorded. Each concentration combination was repeated four times, and the final average slope of  $I_0/I$  to concentration is reported here as the  $K_{\text{SV}}$ .

**Constant [collidine], varied alcohol substrate [SM]**

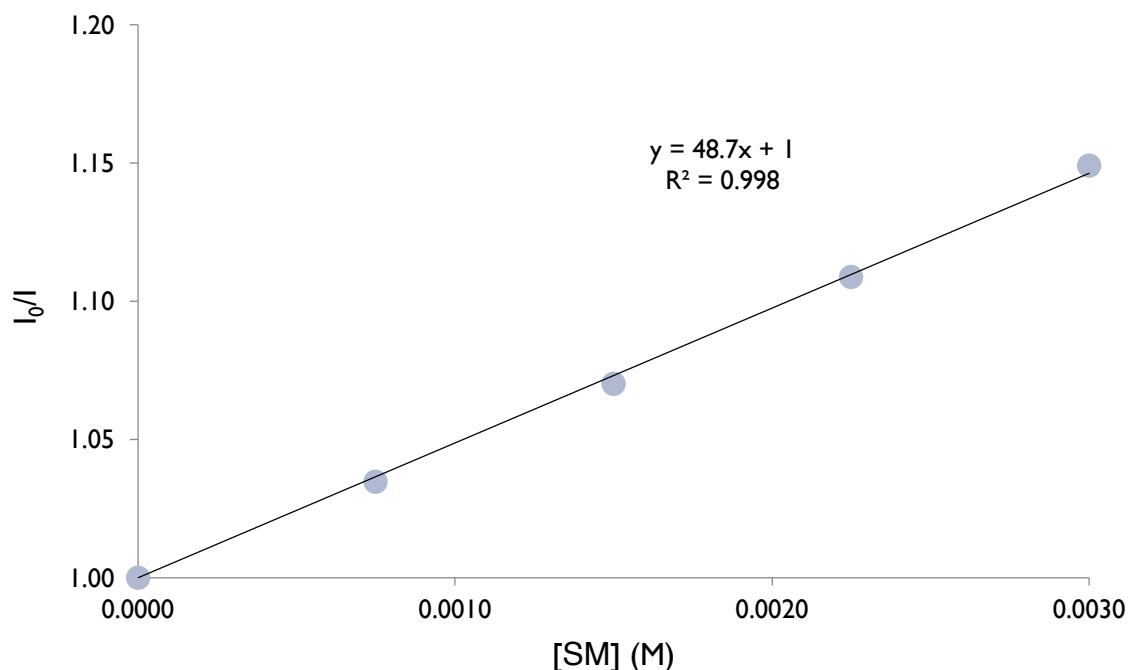

**Figure S1.** Stern-Volmer plot of  $[\text{Ir}(\text{dF}(\text{CF}_3)\text{ppy})_2(5,5'\text{-d}(\text{CF}_3)\text{bpy})](\text{PF}_6)$  (244  $\mu\text{M}$ ) with varied [SM] in the presence of a constant concentration of collidine (7.22 mM) in  $\text{CH}_2\text{Cl}_2$  at 23  $^\circ\text{C}$ .

**Table S1.** Individual results from Stern-Volmer quenching experiments with  $[\text{Ir}(\text{dF}(\text{CF}_3)\text{ppy})_2(5,5'\text{-d}(\text{CF}_3)\text{bpy})](\text{PF}_6)$  (244  $\mu\text{M}$ ) with varied [SM] in the presence of collidine in  $\text{CH}_2\text{Cl}_2$  at 23  $^\circ\text{C}$ .

| [Collidine] (M) | [SM] (M) | $I_{\text{emission}}$ (586 nm) |         |         |         | mean $I_{\text{emission}}$ | $I_0/I$ |
|-----------------|----------|--------------------------------|---------|---------|---------|----------------------------|---------|
|                 |          | run 1                          | run 2   | run 3   | run 4   |                            |         |
| 7.22E-03        | 0.00E+00 | 161.199                        | 161.031 | 163.145 | 158.074 | 160.862                    | 1.00    |
| 7.22E-03        | 7.50E-04 | 154.695                        | 155.840 | 157.740 | 153.645 | 155.480                    | 1.03    |
| 7.22E-03        | 1.50E-03 | 152.654                        | 146.342 | 150.799 | 151.491 | 150.321                    | 1.07    |
| 7.22E-03        | 2.25E-03 | 146.802                        | 145.864 | 143.602 | 144.056 | 145.081                    | 1.11    |
| 7.22E-03        | 3.00E-03 | 140.621                        | 141.546 | 140.524 | 137.333 | 140.006                    | 1.15    |



**Constant [SM], varied [collidine]**

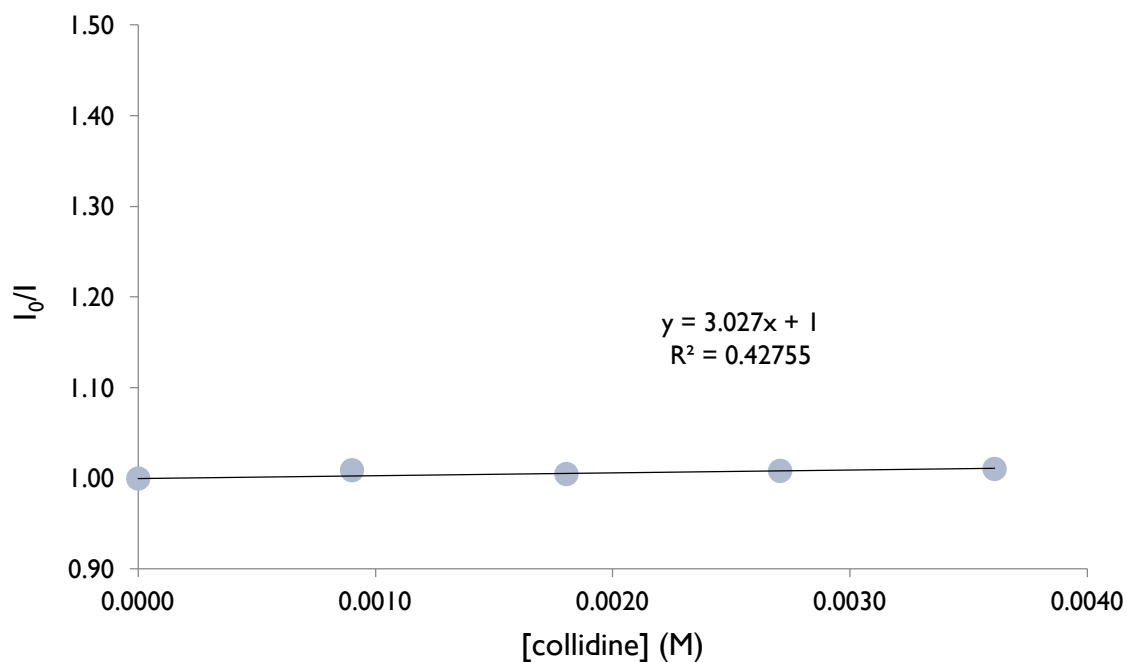

**Figure S2.** Stern-Volmer plot of  $[\text{Ir}(\text{dF}(\text{CF}_3)\text{ppy})_2(5,5'\text{-d}(\text{CF}_3)\text{bpy})](\text{PF}_6)$  (244  $\mu\text{M}$ ) with varied  $[\text{collidine}]$  in the presence of a constant concentration of SM (15.0 mM) in  $\text{CH}_2\text{Cl}_2$  at 23  $^\circ\text{C}$ .

**Table S2.** Individual results from Stern-Volmer quenching experiments with  $[\text{Ir}(\text{dF}(\text{CF}_3)\text{ppy})_2(5,5'\text{-d}(\text{CF}_3)\text{bpy})](\text{PF}_6)$  (244  $\mu\text{M}$ ) with varied  $[\text{collidine}]$  in the presence of SM in  $\text{CH}_2\text{Cl}_2$  at 23  $^\circ\text{C}$ .

| $[\text{Collidine}] \text{ (M)}$ | $[\text{SM}] \text{ (M)}$ | $I_{\text{emission}} \text{ (586 nm)}$ |        |        |         | mean $I_{\text{emission}}$ | $I_0/I$ |
|----------------------------------|---------------------------|----------------------------------------|--------|--------|---------|----------------------------|---------|
|                                  |                           | run 1                                  | run 2  | run 3  | run 4   |                            |         |
| 0.00E+00                         | 1.50E-02                  | 104.956                                | 99.300 | 98.479 | 100.563 | 100.824                    | 1.00    |
| 9.02E-04                         | 1.50E-02                  | 105.590                                | 97.163 | 98.756 | 98.281  | 99.948                     | 1.01    |
| 1.80E-03                         | 1.50E-02                  | 104.299                                | 98.604 | 98.969 | 99.683  | 100.389                    | 1.00    |
| 2.71E-03                         | 1.50E-02                  | 104.126                                | 97.898 | 98.404 | 99.683  | 100.028                    | 1.01    |
| 3.61E-03                         | 1.50E-02                  | 108.776                                | 93.766 | 97.250 | 99.457  | 99.812                     | 1.01    |

### Experimental Details for Investigating Long-range PCET (Figure 3)

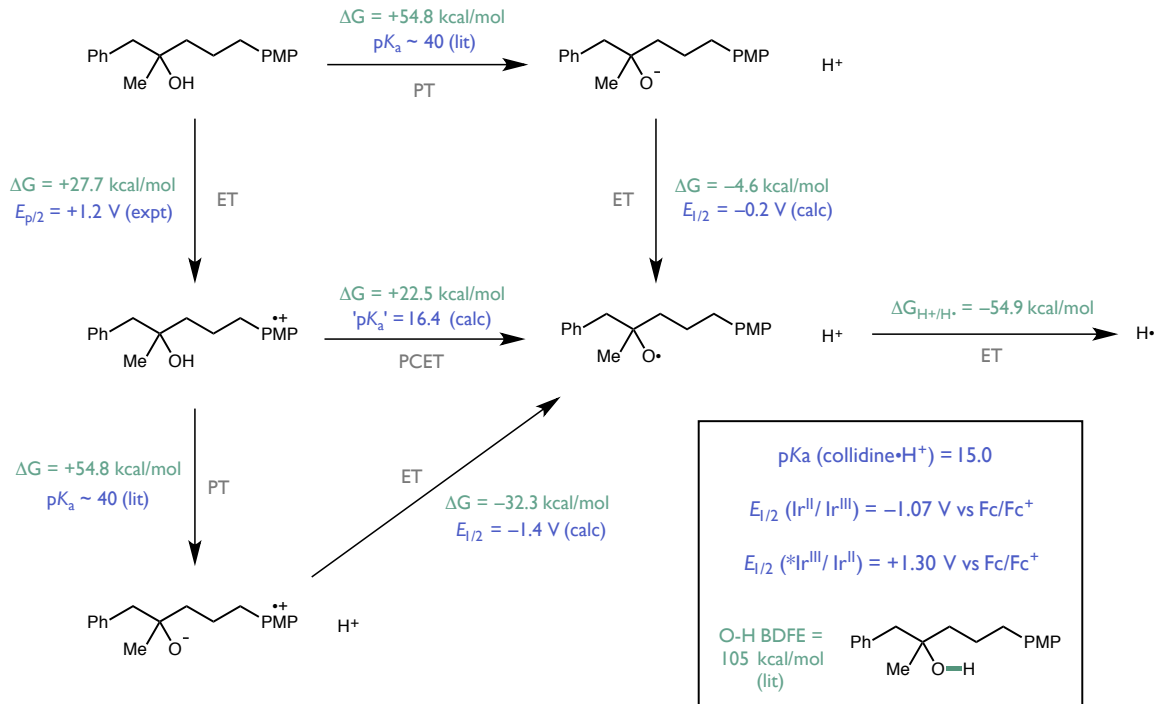

• All values given are for MeCN. All potentials are referenced to Fc/Fc<sup>+</sup>.

• Values labelled (calc) are calculated from the thermochemical data presented in the figure using the following expression:

$$\text{BDFE (kcal/mol)} = 1.37 \text{ p}K_a + 23.06 \text{ E}^0 + 54.9 \text{ kcal/mol (RT in MeCN)}$$

**Figure S3.** Relationship and energy of different species and mechanistic pathways.

Screw-cap 2-dram vials outfitted with PTFE/silicone septa were charged with the relevant alcohol (0.05 mmol, 1.0 equiv), redistilled collidine (0.15 mmol, 3.0 equiv, 20  $\mu\text{L}$ ), and redistilled thiophenol (13  $\mu\text{mol}$ , 0.25 equiv, 1.3  $\mu\text{L}$ ). A 1-mM stock solution of [Ir(dF(CF<sub>3</sub>)ppy)<sub>2</sub>(5,5'-d(CF<sub>3</sub>)bpy)](PF<sub>6</sub>) in degassed anhydrous CH<sub>2</sub>Cl<sub>2</sub> was made, and 0.5 mL of this solution (0.5  $\mu\text{mol}$ , 0.01 equiv in photocatalyst) was added to each vial via syringe. Thereafter, the vials were frozen in liquid nitrogen, evacuated, and let thaw in warm water bath; this process was repeated three times. The reactions were irradiated by strips of blue LED lights set inside a recrystallization dish, and let stir under a nitrogen atmosphere at room temperature with a fan to cool the setup. After 16–18 hours, the irradiation was stopped, and dibenzyl ether (0.05 mmol, 1.0 equiv, 9.5  $\mu\text{L}$ ) was introduced into each reaction as an internal standard. The crude reactions were concentrated, dissolved in benzene-*d*<sub>6</sub>, and submitted for <sup>1</sup>H NMR. Percentage yields are calculated from integral ratio of ArCOCH<sub>2</sub> peak to (PhCH<sub>2</sub>)<sub>2</sub>O peak. These yields were also confirmed by GC assays developed for the ketone products.

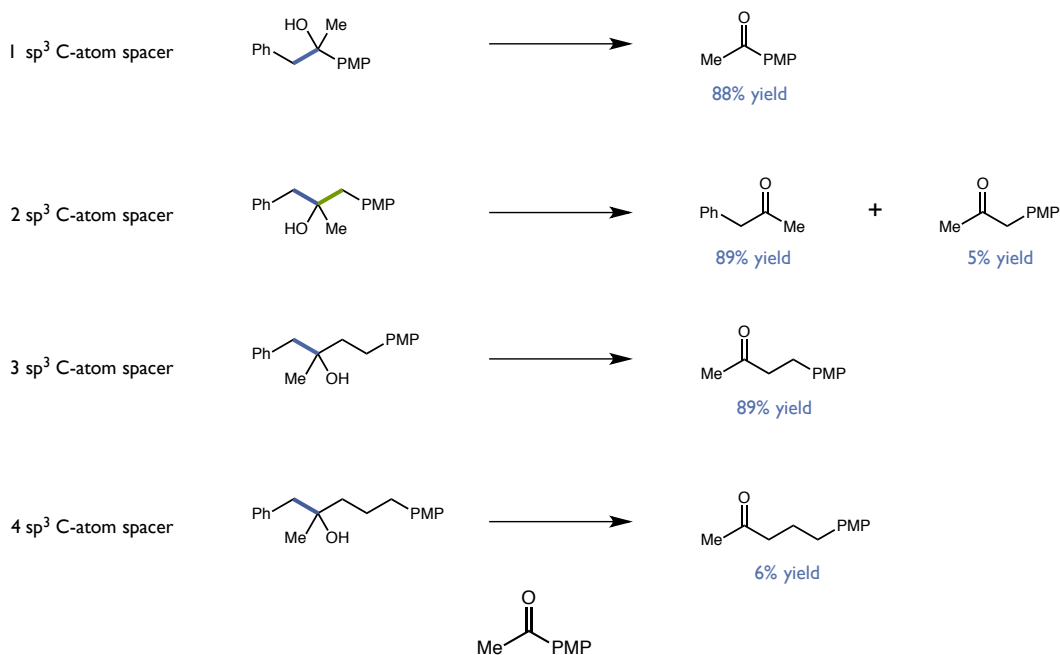

### 1-(4-methoxyphenyl)ethan-1-one

Spectra are consistent with reported literature values<sup>13</sup> and commercial samples.

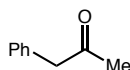

### 1-phenylpropan-2-one

Spectra are consistent with reported literature values.<sup>14</sup>

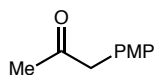

### 1-(4-methoxyphenyl)propan-2-one

Spectra are consistent with reported literature values<sup>15</sup> and commercial samples.

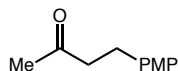

### 4-(4-methoxyphenyl)butan-2-one

Spectra are consistent with reported literature values<sup>16</sup> and commercial samples.

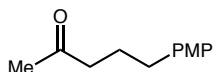

### 5-(4-methoxyphenyl)pentan-2-one

Spectra are consistent with reported literature values.<sup>17</sup>

## Experimental Details for Investigating the Relationship Between Effective BDFE and Reaction Outcomes (Figure 4)

Setup for Brønsted bases 2-methoxypyridine, pyridine, and tetrabutylammonium trifluoroacetate followed the procedures outlined in the previous section. For TBA<sup>+</sup>TFA<sup>-</sup>, only 1 equiv (0.05 mmol) was used, and the weighing was carried out in a glovebox. Dibenzyl ether (0.05 mmol, 1.0 equiv, 9.5 μL) was used as an internal standard to calculate percentage yields, based on the <sup>1</sup>H NMR signal integral ratio of ArCOCH<sub>2</sub> peak to (PhCH<sub>2</sub>)<sub>2</sub>O peak. Average isolated yields of 1-mmol reactions are reported for collidine reactions.

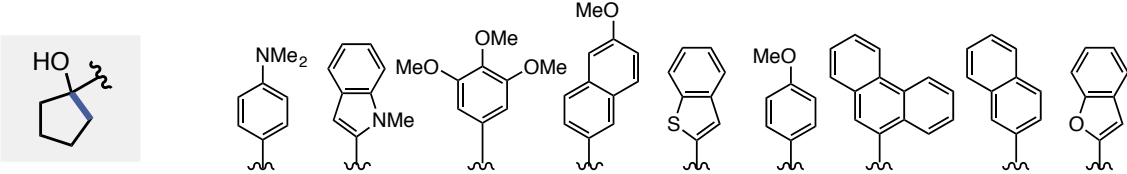

| Base                                              | $E_{p/2}$ (V) | 0.39 | 0.69 | 0.92 | 0.96 | 1.18 | 1.22 | 1.22 | 1.24 | 1.27 |
|---------------------------------------------------|---------------|------|------|------|------|------|------|------|------|------|
| 2-MeO-pyridine<br>$pK_a = 9.9$                    | 'BDFE'        | 77   | 84   | 90   | 91   | 96   | 97   | 97   | 97   | 98   |
|                                                   | Yield (%)     | 0    | 0    | 0    | 0    | 0    | 0    | 0    | <5   | 8    |
| pyridine<br>$pK_a = 12.5$                         | 'BDFE'        | 81   | 88   | 93   | 94   | 99   | 100  | 100  | 101  | 101  |
|                                                   | Yield (%)     | 0    | 0    | 0    | <5   | 6    | 16   | 14   | 5    | 19   |
| CF <sub>3</sub> COO <sup>-</sup><br>$pK_a = 12.5$ | 'BDFE'        | 81   | 88   | 93   | 94   | 99   | 100  | 100  | 101  | 101  |
|                                                   | Yield (%)     | 0    | 0    | 0    | 0    | 23   | 87   | 79   | 97   | 18   |
| collidine<br>$pK_a = 15$                          | 'BDFE'        | 84   | 91   | 97   | 98   | 103  | 104  | 104  | 104  | 105  |
|                                                   | Yield (%)     | 0    | 0    | <5   | 7    | 86   | 86   | 82   | 41   | 84   |

**Figure S4.** Effective BDFE and reaction outcome.

## Cyclic Voltammograms of Starting Materials

All voltammograms were taken at room temperature using a saturated calomel (SCE) reference electrode, a mesh platinum (Pt) counter electrode, and a glassy carbon working electrode. The conditions of the experiments were the following: an acetonitrile solution of 100 mM tetrabutylammonium hexafluorophosphate ( $\text{NBu}_4\text{PF}_6$ ) and 1 mM aryl alcohol, a scan rate of 0.1 V/s, and a positive initial scan direction. The reported potentials were averages over segments, and were taken at half-height of the cathodic peaks ( $E_{p/2}$ ) of the compounds, since all oxidations were nonreversible. To convert the potentials from SCE to  $\text{Fc}/\text{Fc}^+$  reference, 380 mV were subtracted from the measured values. The positive peaks on the return sweep of most substrates were thought to signify an ECE-type mechanism.<sup>18</sup>

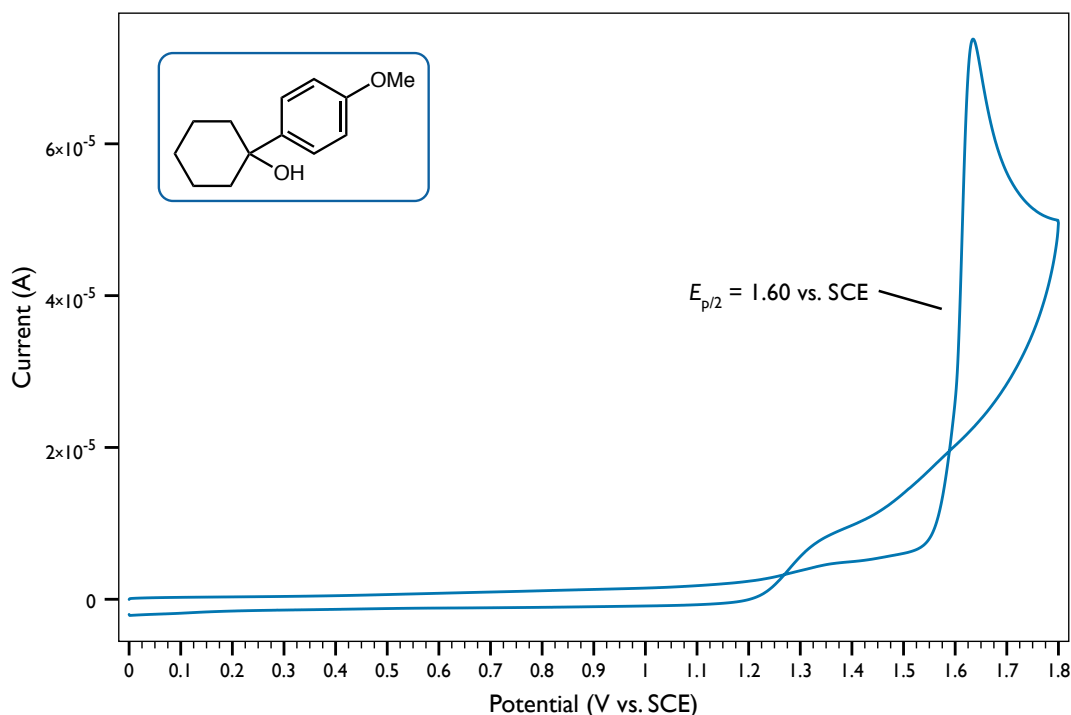

**Figure S5.** CV of 1-(4-methoxyphenyl)cyclohexan-1-ol in MeCN

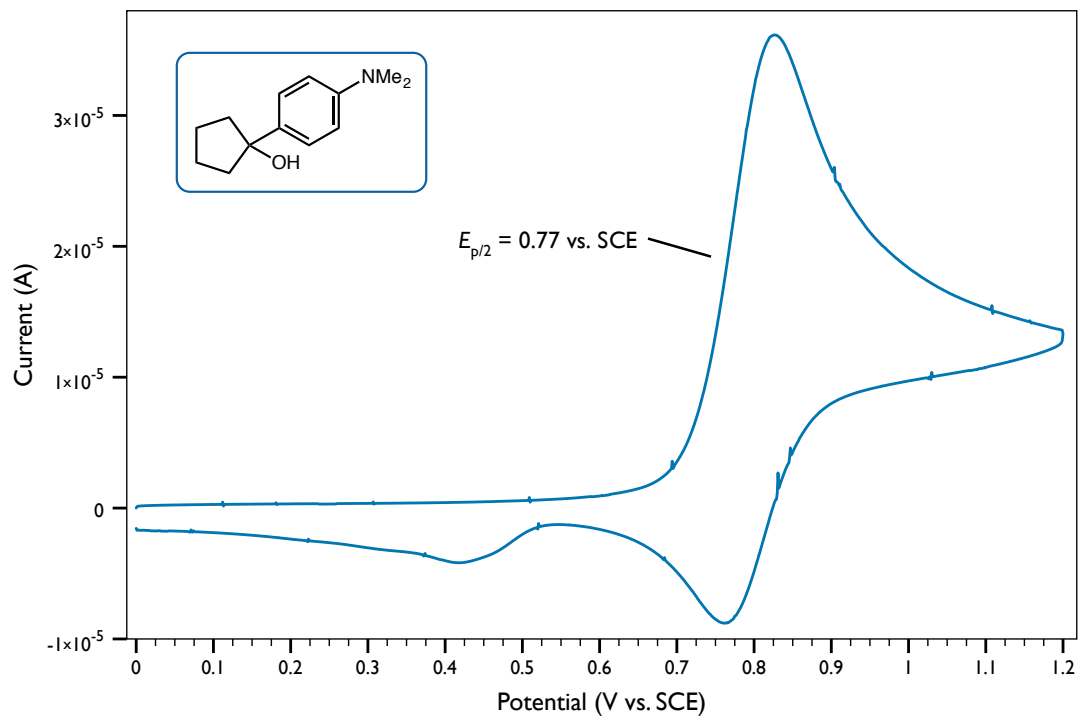

**Figure S6.** CV of 1-(4-(dimethylamino)phenyl)cyclopentanol in MeCN

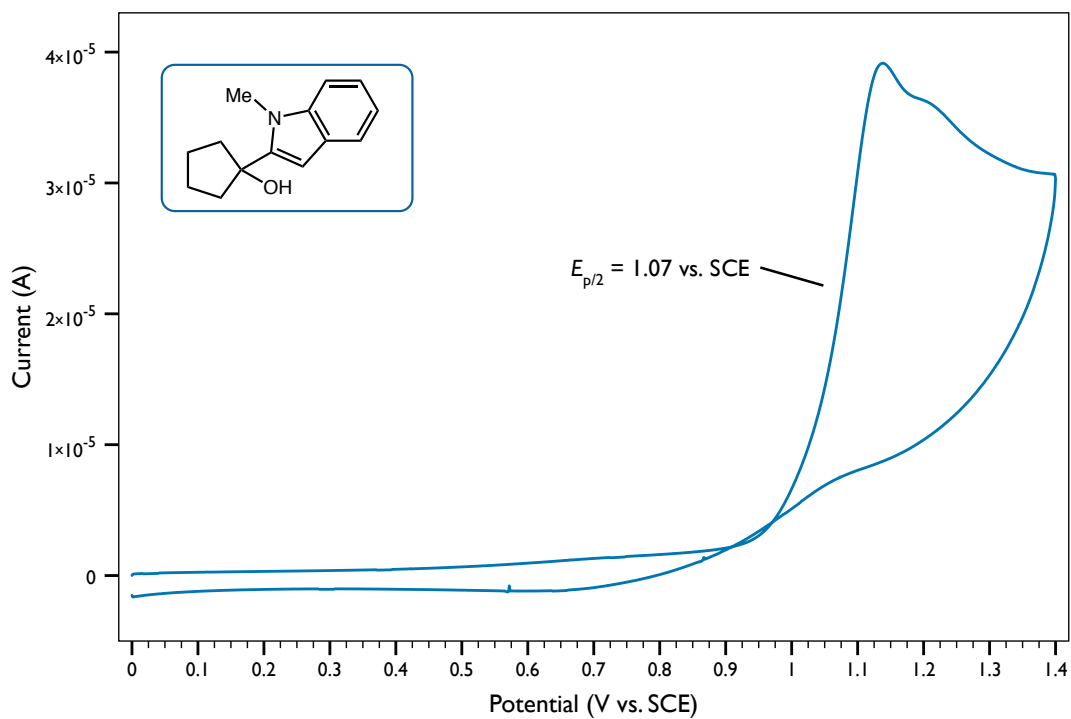

**Figure S7.** CV of 1-(1-methyl-1H-indol-2-yl)cyclopentanol in MeCN

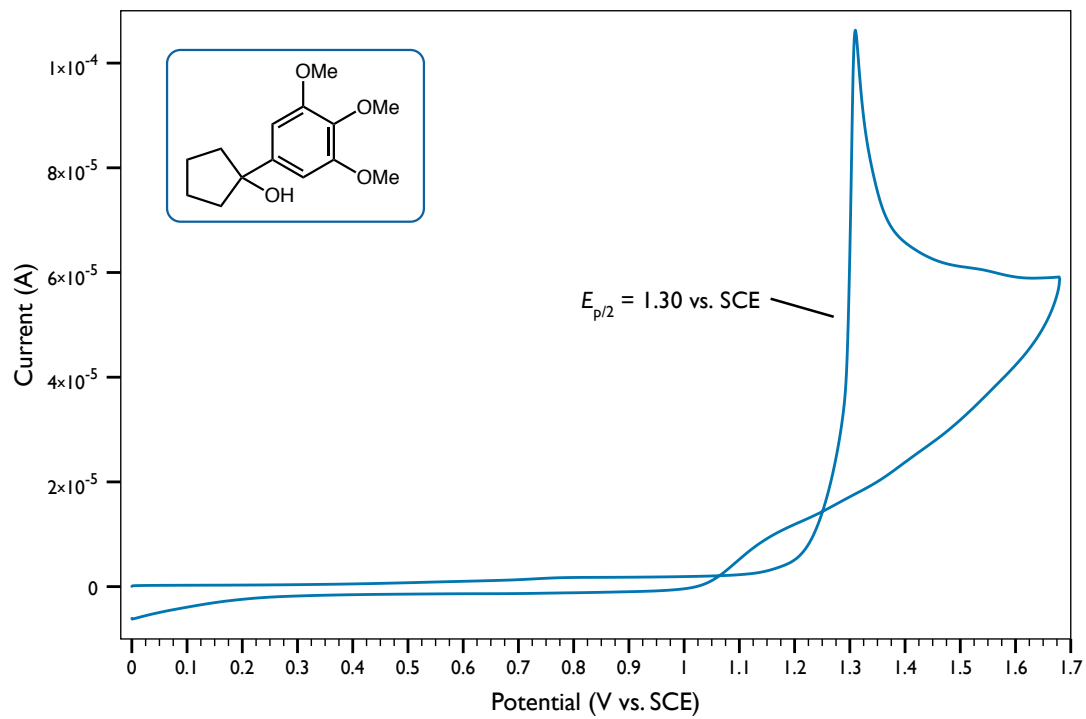

**Figure S8.** CV of 1-(3,4,5-trimethoxyphenyl)cyclopentan-1-ol in MeCN

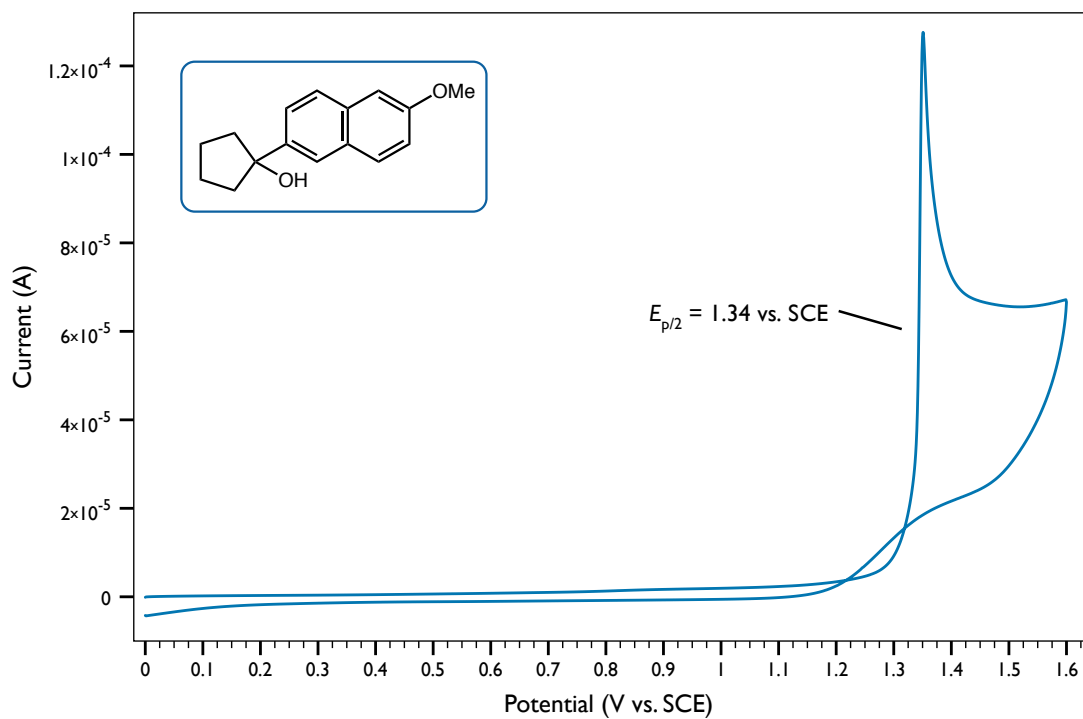

**Figure S9.** CV of 1-(6-methoxynaphthalen-2-yl)cyclopentan-1-ol in MeCN

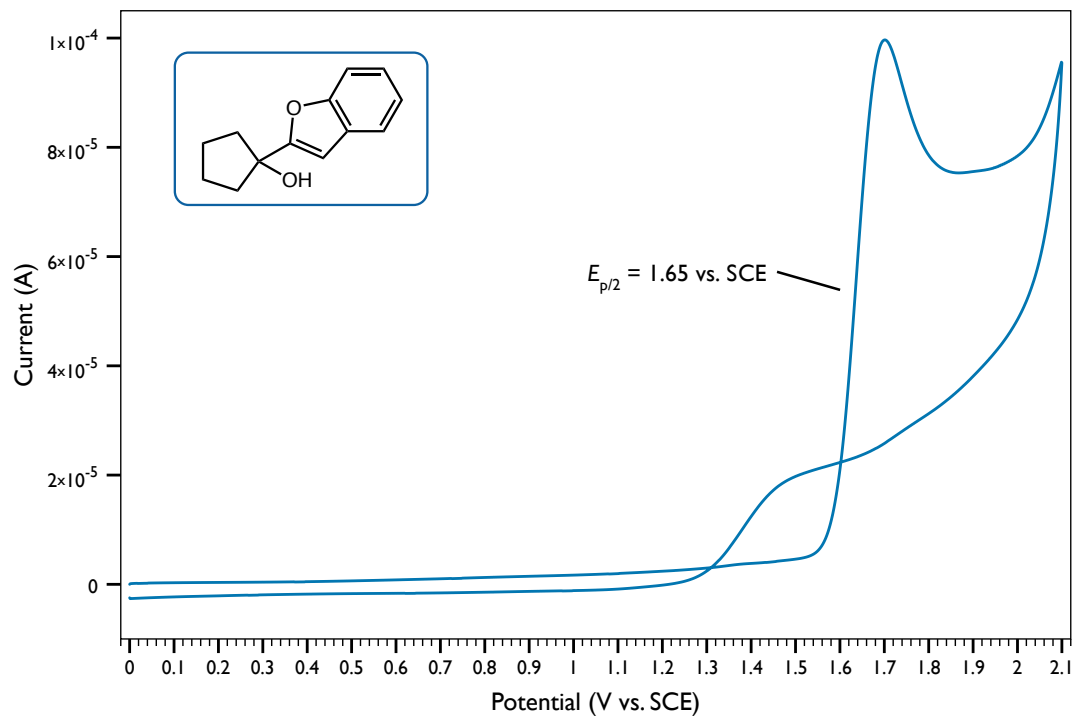

**Figure S10.** CV of 1-(benzofuran-2-yl)cyclopentanol in MeCN

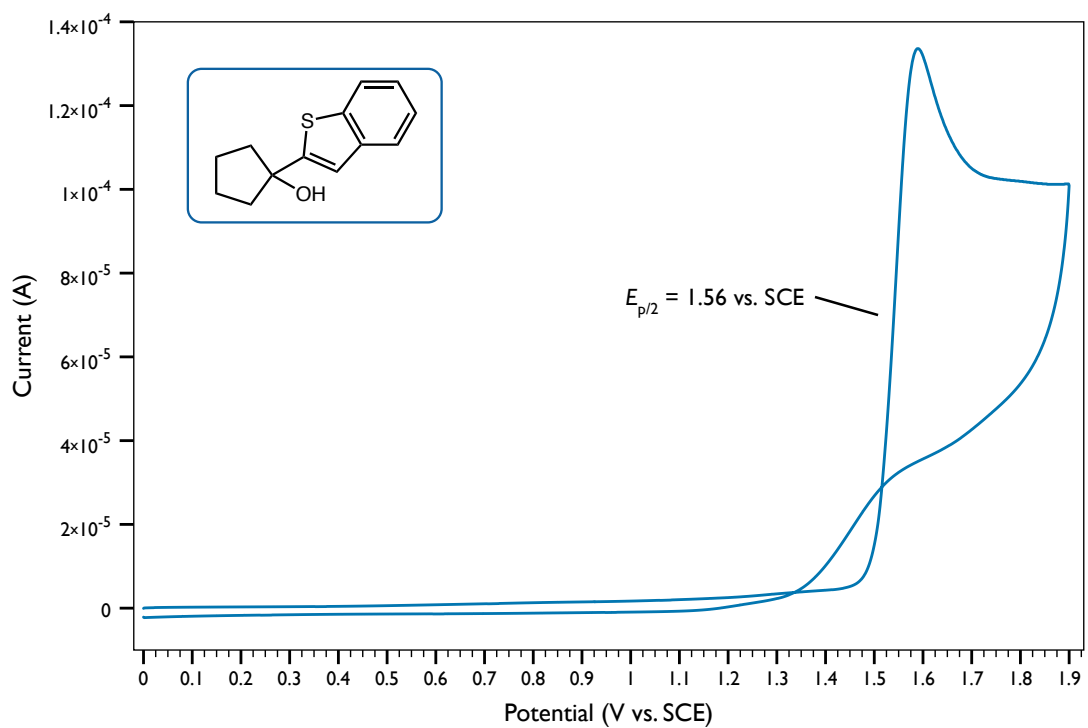

**Figure S11.** CV of 1-(benzo[b]thiophen-2-yl)cyclopentanol in MeCN



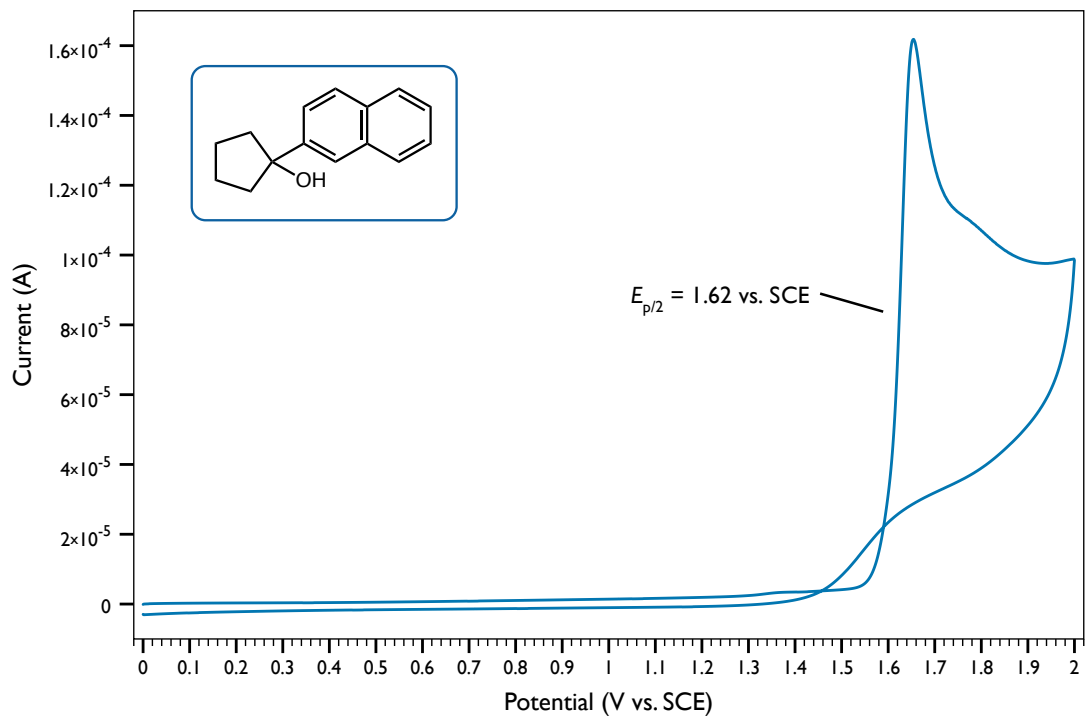

**Figure S12.** CV of 1-(naphthalen-2-yl)cyclopentanol in MeCN

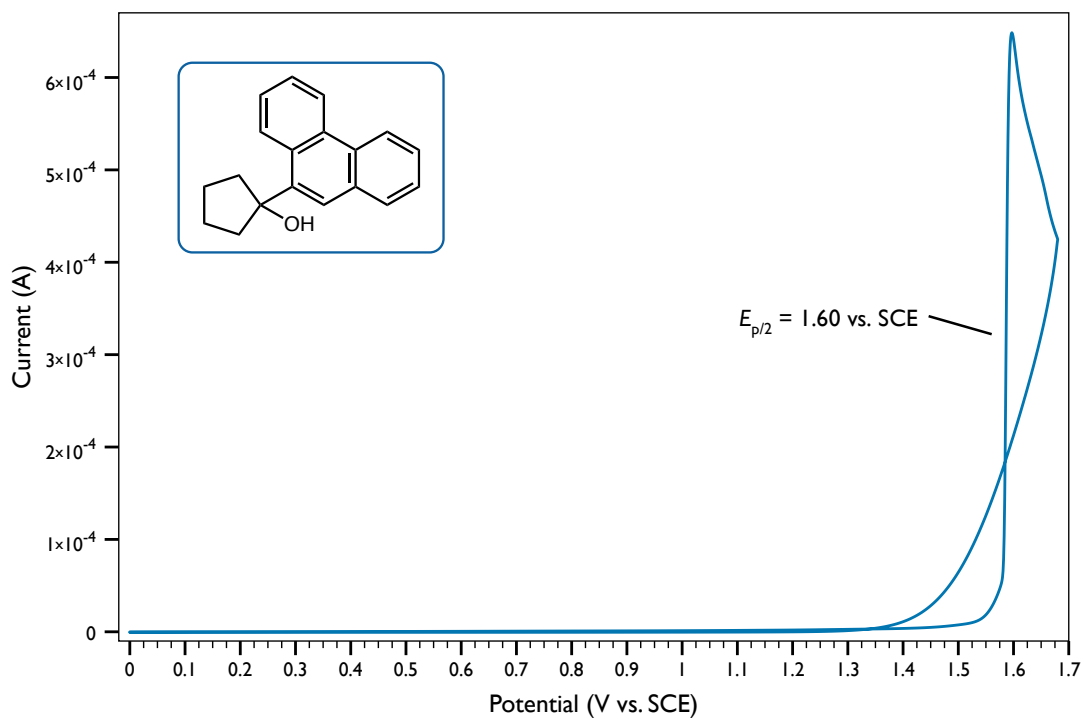

**Figure S13.** CV of 1-(phenanthren-9-yl)cyclopentanol in MeCN

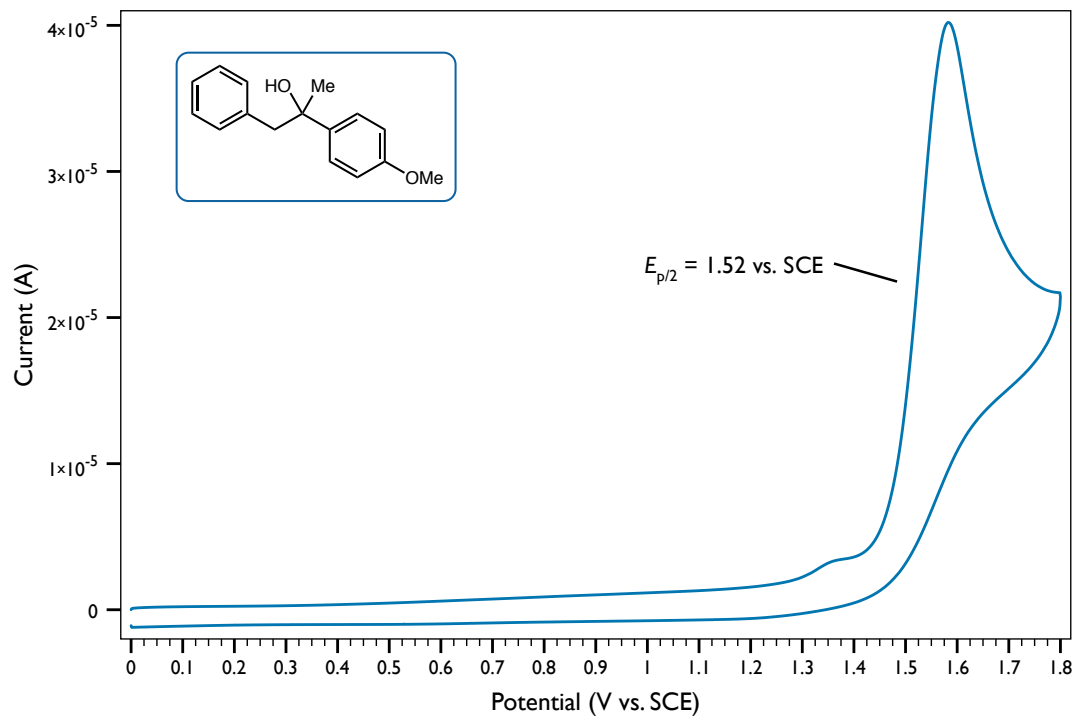

**Figure S14.** CV of 2-(4-methoxyphenyl)-1-phenylpropan-2-ol in MeCN

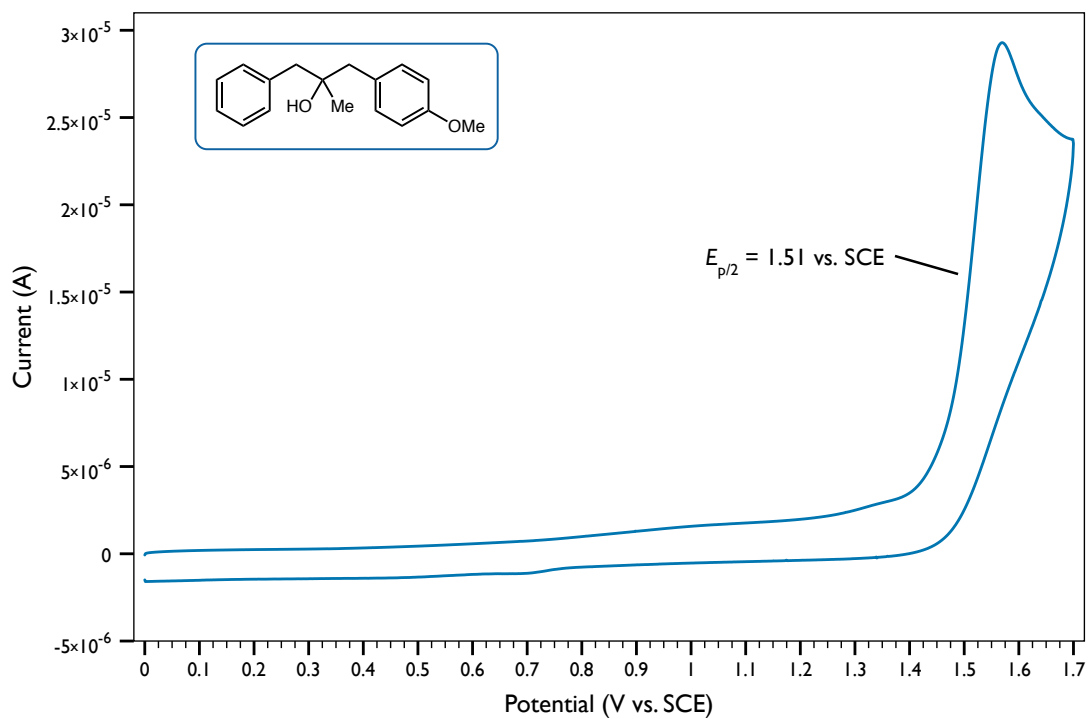

**Figure S15.** CV of 1-(4-methoxyphenyl)-2-methyl-3-phenylpropan-2-ol in MeCN

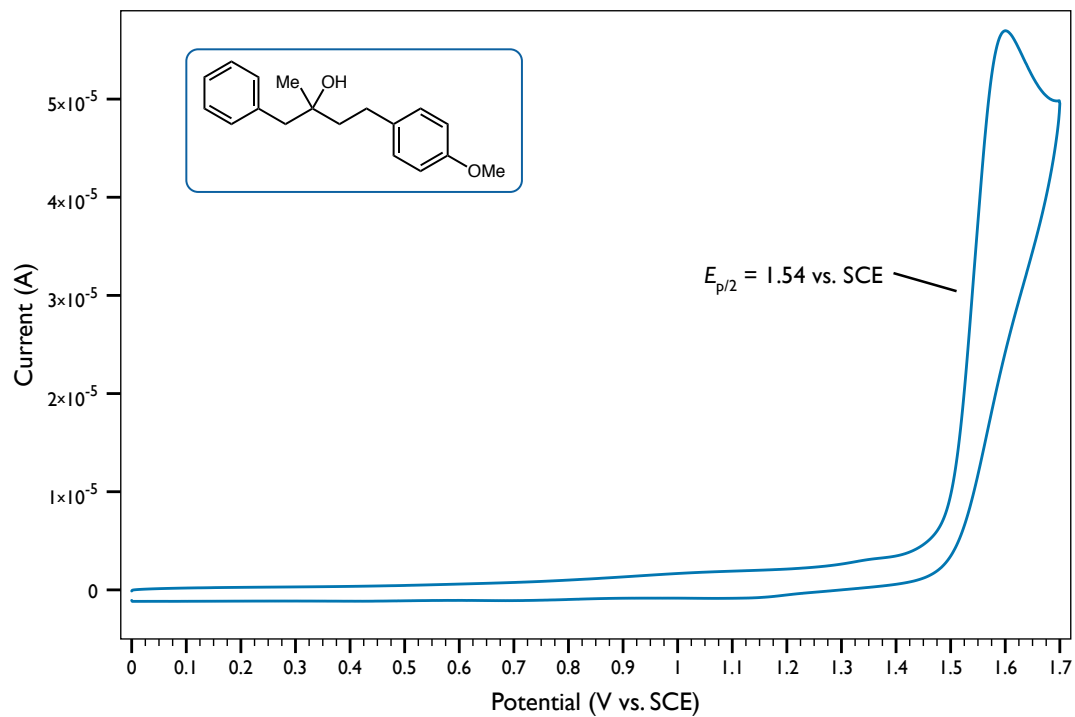

**Figure S16.** CV of 4-(4-methoxyphenyl)-2-methyl-1-phenylbutan-2-ol in MeCN

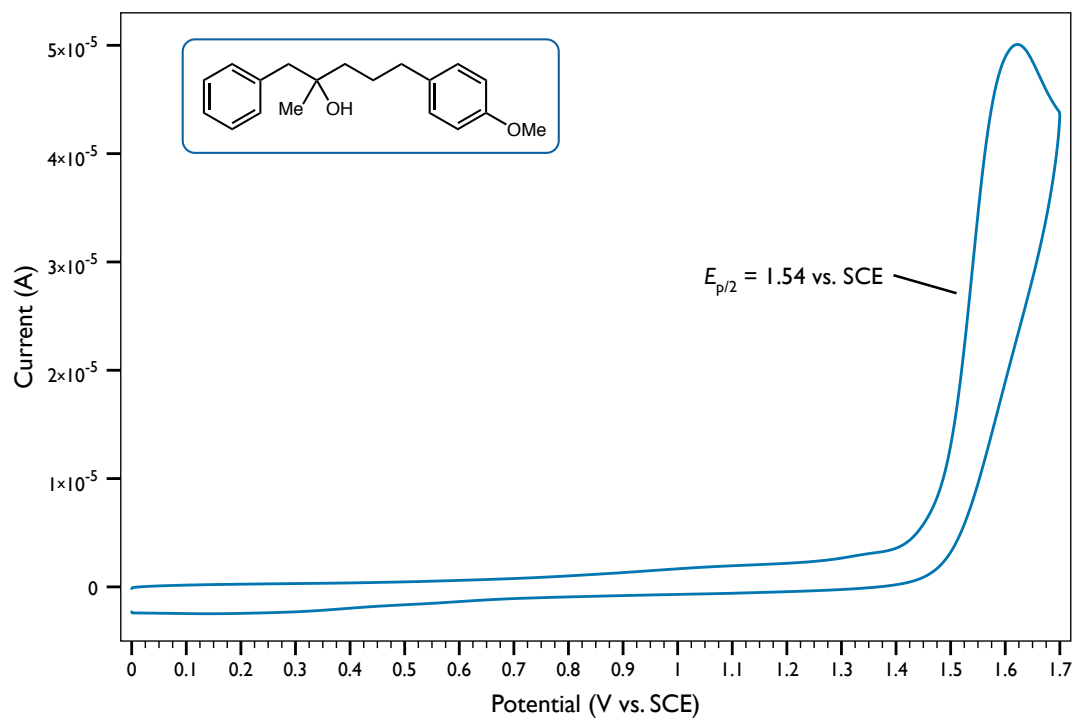

**Figure S17.** CV of 5-(4-methoxyphenyl)-2-methyl-1-phenylpentan-2-ol in MeCN

## Structure and Potential Data of Photocatalysts

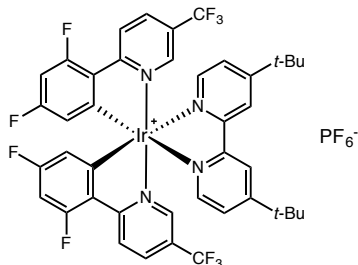

**[Ir(dF(CF<sub>3</sub>)ppy)(dtbbpy)](PF<sub>6</sub>) (A).**  $E_{1/2}(*\text{Ir}^{\text{III}}/\text{Ir}^{\text{II}}) = 1.21 \text{ V vs. SCE.}^{19}$

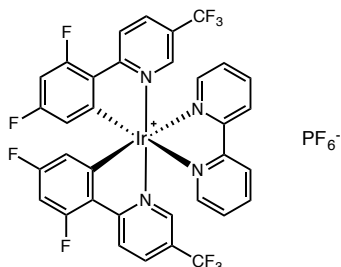

**[Ir(dF(CF<sub>3</sub>)ppy)(bpy)](PF<sub>6</sub>) (B).**  $E_{1/2}(*\text{Ir}^{\text{III}}/\text{Ir}^{\text{II}}) = 1.32 \text{ V vs. SCE.}^{20}$

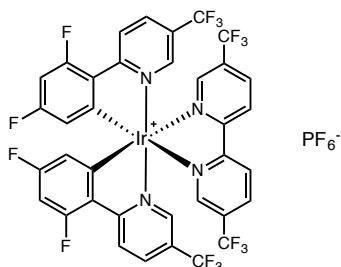

**[Ir(dF(CF<sub>3</sub>)ppy)(5,5'-d(CF<sub>3</sub>)bpy)](PF<sub>6</sub>) (C)**

Ground state potentials were measured by CV in similar fashion to those in the previous section, at a 0.05 V/s scan rate with a negative initial direction. Excited state reduction potential was calculated using the Rehm-Weller equation:<sup>21</sup>

$$E_{\text{red}}^{\circ*} = E_{\text{red}}^{\circ} + E^{0-0}$$

where  $E^{\circ*}$  denotes the excited state reduction potential,  $E^{\circ}$  the ground state reduction potential, and  $E^{0-0}$  the energy difference between the 0<sup>th</sup> vibration level of the ground state and that of the excited state. Due to the poor overlap between the absorption and emission spectra,  $E^{0-0}$  is approximated as the high-energy onset of phosphorescence where the emission intensity is 10% of the obtained at the maximum emission wavelength, using the “10% rule.”<sup>22</sup> These estimations were corroborated by approximating the HOMO-LUMO gap as the difference between the onset of oxidation and the onset of reduction.<sup>23</sup>  $E_{1/2}(\text{Ir}^{\text{III}}/\text{Ir}^{\text{II}}) = -0.69 \text{ V vs. SCE}$ ;  $E_{1/2}(*\text{Ir}^{\text{III}}/\text{Ir}^{\text{II}}) = 1.68 \text{ V vs. SCE}$ .

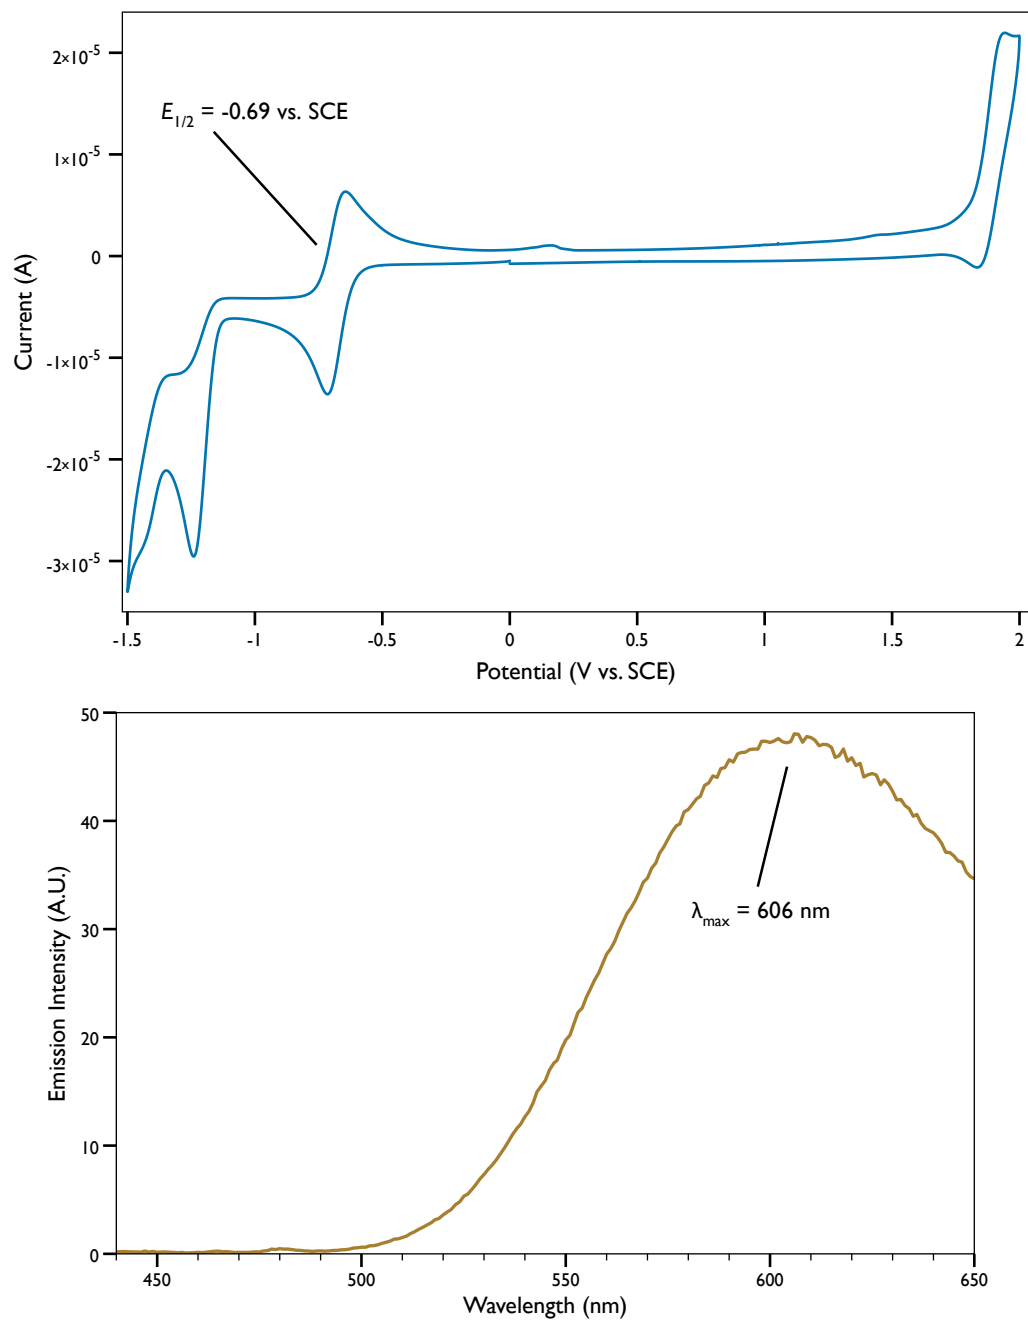

**Figure S18.** CV and phosphorescence spectrum of photocatalyst C in MeCN. The emission spectrum was taken with excitation wavelength of 420 nm. The emission maxima is at 606 nm, thus the 10% of the maxima is at 524 nm.

## DFT Computations

All calculations used DFT methodology<sup>24</sup> as implemented in the Gaussian 09 series of computer programs.<sup>25</sup> We employed the unrestricted B3LYP functional<sup>26</sup> and the all-electron, valence triple- $\zeta$  plus polarization and diffuse function 6-311++G(2df,2p) basis sets.<sup>27</sup> Calculations were performed in the gas phase as well as with the CPCM polarizable conductor calculation model for acetonitrile.<sup>28</sup> All molecules underwent geometry optimization, and stationary points were subjected to normal mode analysis.

### Calculation of O-H bond energies:

The bond energy was determined by calculating the energies of alcohol **4**, its corresponding alkoxy radical and an H-atom (Figure S19a). The O-H bond energy of the alcohol starting material was referenced to the O-H BDE of *t*-BuOH (106.3 kcal/mol) (Figure S19b).<sup>29</sup>

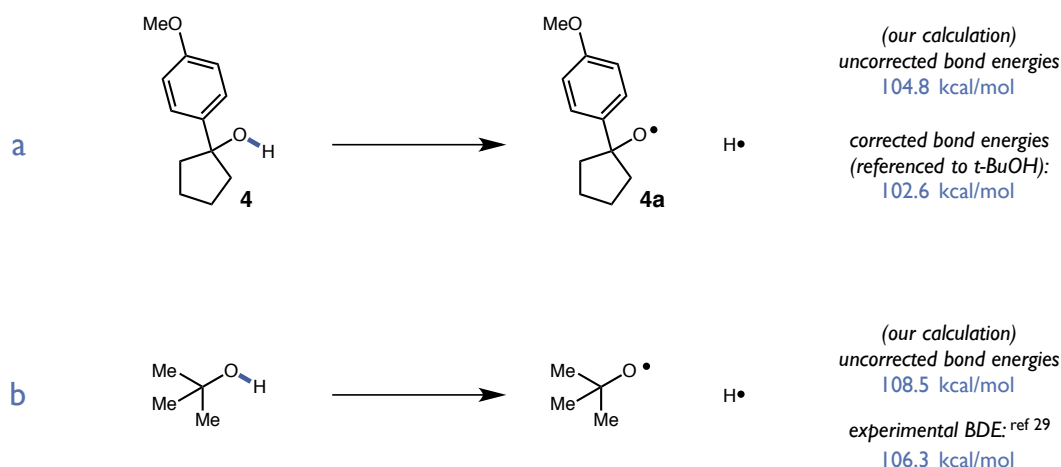

**Figure S19.** Chemical equations for thermodynamic analysis

**Table S3.** Thermodynamic parameters: Geometries and frequencies were calculated with UB3LYP/6-311++G(2df,2p) with addition of the CPCM (solvent = acetonitrile) solvation model. Energies are given in hartrees particle<sup>-1</sup>.

| Entry | Job Name     | E            | G           | H          | S       |
|-------|--------------|--------------|-------------|------------|---------|
| 1     | tBuOH        | -233.771051  | -233.665141 | -233.62844 | 77.251  |
| 2     | tBuO-radical | -233.0959008 | -233.003888 | -232.96681 | 78.03   |
| 3     | H-atom       | -0.502283065 | -0.512937   | -0.499923  | 27.392  |
| 4     | <b>4</b>     | -617.5620333 | -617.345275 | -617.29049 | 115.298 |
| 5     | <b>4a</b>    | -616.8927875 | -616.689505 | -616.63494 | 114.853 |

### Calculation of C-C bond energies:

The bond strengths of the scissile C-C bonds in 2-(4-methoxyphenyl)propan-2-ol (Figure S20a) and its corresponding alkoxy radical (Figure S20b) were estimated using DFT. To avoid the impact of ring strain on this BDE, 2-(4-methoxyphenyl)propan-2-ol was chosen as a model substrate to calculate the C-C bond energy. Furthermore, this substrate allowed us to reference all bond energies to experimental ethane C-C bond energies (Figure S20c).<sup>30</sup>

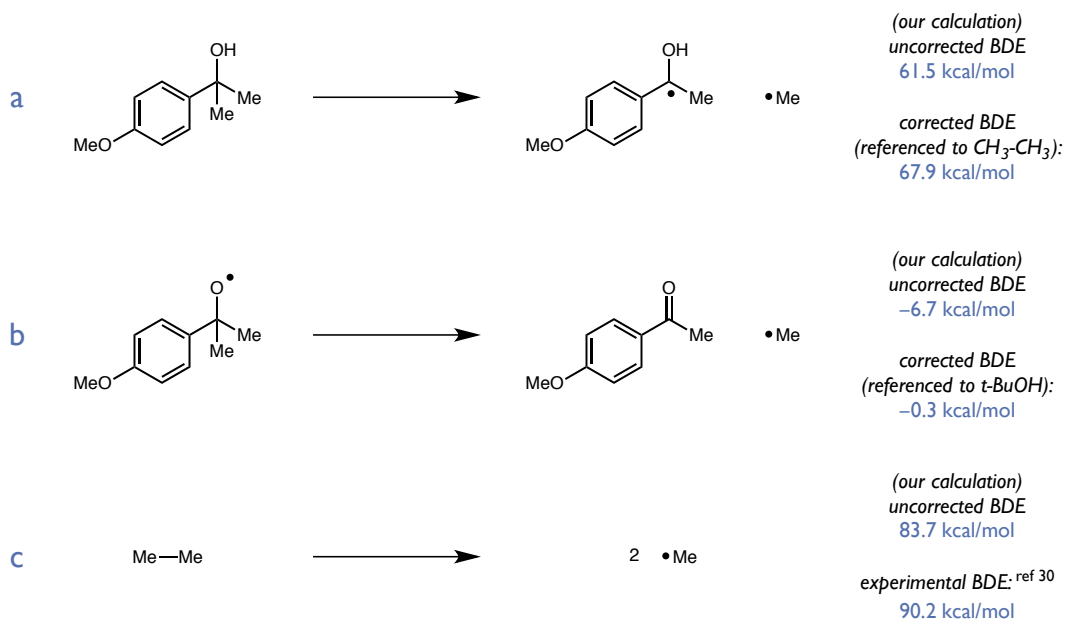

**Figure S20.** Chemical equations for thermodynamic analysis

**Table S4.** Thermodynamic parameters: Geometries and frequencies were calculated with UB3LYP/6-311++G(2df,2p) with addition of the CPCM (solvent = acetonitrile) solvation model. Energies are given in hartrees particle<sup>-1</sup>.

| Entry | Job Name                                | E            | G           | H          | S      |
|-------|-----------------------------------------|--------------|-------------|------------|--------|
| 1     | 2-(4-methoxyphenyl)propan-2-ol          | -540.1276347 | -539.945126 | -539.89384 | 107.94 |
| 2     | 2-(4-methoxyphenyl)propan-2-ol ketyl    | -500.1625304 | -500.021591 | -499.97093 | 106.63 |
| 3     | 2-(4-methoxyphenyl)propan-2-oxy radical | -539.4556213 | -539.286322 | -539.23474 | 108.57 |
| 4     | 1-(4-methoxyphenyl)ethan-1-one          | -2.954782878 | -499.468264 | -499.42058 | 100.35 |
| 5     | Me radical                              | -39.85846751 | -39.846941  | -39.824865 | 46.462 |
| 6     | Ethane                                  | -79.86192507 | -79.809124  | -79.783261 | 54.432 |

### Optimized geometries:

Optimized geometries in Cartesian coordinates (Å) and energies (hartrees) for stationary points.

H•

```
E(UB3LYP) = -0.502283065410
Zero-point correction=          0.000000 (Hartree/Particle)
Thermal correction to Energy=    0.001416
Thermal correction to Enthalpy=  0.002360
Thermal correction to Gibbs Free Energy= -0.010654
Sum of electronic and zero-point Energies= -0.502283
Sum of electronic and thermal Energies= -0.500867
Sum of electronic and thermal Enthalpies= -0.499923
Sum of electronic and thermal Free Energies= -0.512937

Charge = 0 Multiplicity = 2
Symbolic Z-Matrix:
H          -1.14243   0.26706   0.
```



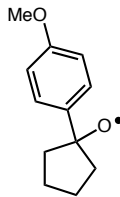

E(UB3LYP) = -616.892787526  
 Zero-point correction= 0.243964 (Hartree/Particle)  
 Thermal correction to Energy= 0.256908  
 Thermal correction to Enthalpy= 0.257853  
 Thermal correction to Gibbs Free Energy= 0.203282  
 Sum of electronic and zero-point Energies= -616.648823  
 Sum of electronic and thermal Energies= -616.635879  
 Sum of electronic and thermal Enthalpies= -616.634935  
 Sum of electronic and thermal Free Energies= -616.689505

Charge = 0 Multiplicity = 2

Symbolic Z-Matrix:

|   |          |          |          |
|---|----------|----------|----------|
| C | 1.77789  | -1.21227 | 0.26871  |
| C | 0.3934   | -1.02284 | 0.17036  |
| C | -0.1542  | 0.25719  | 0.09391  |
| C | 0.7226   | 1.35024  | 0.11671  |
| C | 2.10955  | 1.16739  | 0.21561  |
| C | 2.63199  | -0.11091 | 0.29201  |
| H | 2.19545  | -2.20804 | 0.33629  |
| H | -0.25083 | -1.89304 | 0.16119  |
| H | 0.31896  | 2.35151  | 0.0636   |
| H | 2.77782  | 2.01806  | 0.23941  |
| O | 3.98704  | -0.30046 | 0.44403  |
| C | 4.73632  | -0.28481 | -0.77512 |
| H | 4.62908  | 0.67286  | -1.2883  |
| H | 5.77749  | -0.43545 | -0.50263 |
| H | 4.41222  | -1.08947 | -1.43866 |
| C | -1.66267 | 0.46922  | -0.02877 |
| C | -2.30756 | -0.19161 | -1.28514 |
| C | -2.50433 | -0.19325 | 1.18582  |
| C | -3.7668  | -0.42125 | -0.90267 |
| H | -1.80769 | -1.14047 | -1.48223 |
| H | -2.1676  | 0.44605  | -2.15762 |
| C | -3.67833 | -0.9463  | 0.5358   |
| H | -2.8345  | 0.59867  | 1.85489  |
| H | -1.82554 | -0.83227 | 1.74427  |
| H | -4.31378 | 0.52195  | -0.92794 |
| H | -4.27247 | -1.11283 | -1.57617 |
| H | -4.60392 | -0.80961 | 1.09316  |
| H | -3.45888 | -2.01533 | 0.52296  |
| O | -2.03241 | 1.77079  | 0.06026  |

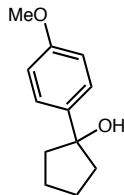

E(UB3LYP) = -617.562033269  
 Zero-point correction= 0.257203 (Hartree/Particle)  
 Thermal correction to Energy= 0.270596  
 Thermal correction to Enthalpy= 0.271540  
 Thermal correction to Gibbs Free Energy= 0.216758  
 Sum of electronic and zero-point Energies= -617.304830  
 Sum of electronic and thermal Energies= -617.291437  
 Sum of electronic and thermal Enthalpies= -617.290493  
 Sum of electronic and thermal Free Energies= -617.345275

Charge = 0 Multiplicity = 1

Symbolic Z-Matrix:

|   |          |          |          |
|---|----------|----------|----------|
| C | 1.76675  | -1.41568 | -0.01356 |
| C | 0.40123  | -1.19306 | -0.00991 |
| C | -0.13112 | 0.10313  | 0.00231  |
| C | 0.76869  | 1.16433  | 0.01074  |
| C | 2.14928  | 0.95883  | 0.00748  |
| C | 2.65573  | -0.33714 | -0.00496 |
| H | 2.16248  | -2.42219 | -0.02238 |
| H | -0.25708 | -2.05159 | -0.01615 |
| H | 0.39437  | 2.17633  | 0.02035  |
| H | 2.807    | 1.81439  | 0.01596  |
| O | 3.98304  | -0.65282 | -0.00893 |
| C | 4.93447  | 0.40726  | 0.00506  |
| H | 4.8321   | 1.01944  | 0.90275  |
| H | 5.91106  | -0.06726 | 0.00093  |
| H | 4.83577  | 1.03988  | -0.87906 |
| C | -1.6342  | 0.32071  | 0.00469  |
| C | -2.36664 | -0.30736 | -1.20061 |
| C | -2.36561 | -0.32818 | 1.20057  |
| C | -3.84886 | -0.34509 | -0.78408 |
| H | -1.99347 | -1.3194  | -1.35858 |
| H | -2.18107 | 0.2593   | -2.11261 |
| C | -3.84691 | -0.43039 | 0.77124  |
| H | -2.21375 | 0.25419  | 2.10877  |
| H | -1.95469 | -1.32171 | 1.37708  |
| H | -4.3672  | 0.555    | -1.11803 |
| H | -4.37054 | -1.18494 | -1.24001 |
| H | -4.43936 | 0.3765   | 1.20257  |
| H | -4.29036 | -1.36032 | 1.12328  |
| O | -1.8544  | 1.74456  | 0.01529  |
| H | -2.80118 | 1.91429  | 0.01042  |

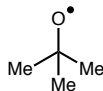

E(UB3LYP) = -233.095900814  
 Zero-point correction= 0.121585 (Hartree/Particle)  
 Thermal correction to Energy= 0.128143  
 Thermal correction to Enthalpy= 0.129087  
 Thermal correction to Gibbs Free Energy= 0.092013  
 Sum of electronic and zero-point Energies= -232.974316  
 Sum of electronic and thermal Energies= -232.967758  
 Sum of electronic and thermal Enthalpies= -232.966814  
 Sum of electronic and thermal Free Energies= -233.003888

Charge = 0 Multiplicity = 2

Symbolic Z-Matrix:

|   |          |          |          |
|---|----------|----------|----------|
| C | -1.40949 | 0.75671  | -0.00002 |
| C | -0.89618 | -0.69522 | -0.00022 |
| H | 0.17382  | -0.69525 | -0.00002 |
| H | -1.25287 | -1.19974 | 0.87336  |
| H | -1.25285 | -1.1995  | -0.87395 |
| C | -2.94949 | 0.75674  | -0.00004 |
| H | -3.30618 | 0.25222  | 0.87353  |
| H | -3.30613 | 1.76555  | 0.00009  |
| H | -3.30615 | 0.25247  | -0.87377 |
| C | -0.89616 | 1.48249  | 1.25749  |
| H | 0.17384  | 1.48247  | 1.25751  |
| H | -1.25281 | 2.4913   | 1.25763  |
| H | -1.25285 | 0.97797  | 2.13107  |
| O | -0.93279 | 1.43098  | -1.16751 |

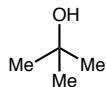

```

E(UB3LYP) = -233.771050974
Zero-point correction= 0.134914 (Hartree/Particle)
Thermal correction to Energy= 0.141670
Thermal correction to Enthalpy= 0.142614
Thermal correction to Gibbs Free Energy= 0.105910
Sum of electronic and zero-point Energies= -233.636137
Sum of electronic and thermal Energies= -233.629381
Sum of electronic and thermal Enthalpies= -233.628437
Sum of electronic and thermal Free Energies= -233.665141

```

Charge = 0 Multiplicity = 1

Symbolic Z-Matrix:

|   |          |          |          |
|---|----------|----------|----------|
| C | -1.40949 | 0.75671  | -0.00002 |
| C | -0.89618 | -0.69522 | -0.00022 |
| H | 0.17382  | -0.69525 | -0.00002 |
| H | -1.25287 | -1.19974 | 0.87336  |
| H | -1.25285 | -1.1995  | -0.87395 |
| C | -2.94949 | 0.75674  | -0.00004 |
| H | -3.30618 | 0.25222  | 0.87353  |
| H | -3.30613 | 1.76555  | 0.00009  |
| H | -3.30615 | 0.25247  | -0.87377 |
| C | -0.89616 | 1.48249  | 1.25749  |
| H | 0.17384  | 1.48247  | 1.25751  |
| H | -1.25281 | 2.4913   | 1.25763  |
| H | -1.25285 | 0.97797  | 2.13107  |
| O | -0.93279 | 1.43098  | -1.16751 |
| H | -1.25277 | 2.33608  | -1.16739 |

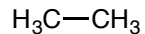

E(UB3LYP) = -79.8619250703  
Zero-point correction= 0.074226 (Hartree/Particle)  
Thermal correction to Energy= 0.077720  
Thermal correction to Enthalpy= 0.078664  
Thermal correction to Gibbs Free Energy= 0.052801  
Sum of electronic and zero-point Energies= -79.787699  
Sum of electronic and thermal Energies= -79.784206  
Sum of electronic and thermal Enthalpies= -79.783261  
Sum of electronic and thermal Free Energies= -79.809124

Charge = 0 Multiplicity = 1

Symbolic Z-Matrix:

|   |          |          |          |
|---|----------|----------|----------|
| C | -2.19585 | 0.07418  | 0.       |
| H | -1.83919 | -0.93463 | 0.       |
| H | -1.83917 | 0.57858  | -0.87365 |
| H | -3.26585 | 0.0742   | 0.       |
| C | -1.6825  | 0.80014  | 1.2574   |
| H | -0.6125  | 0.79996  | 1.2575   |
| H | -2.039   | 1.80901  | 1.25731  |
| H | -2.03934 | 0.29585  | 2.13106  |

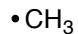

|                                              |                |                             |
|----------------------------------------------|----------------|-----------------------------|
| E(UB3LYP) =                                  | -39.8584675068 |                             |
| Zero-point correction=                       |                | 0.029612 (Hartree/Particle) |
| Thermal correction to Energy=                |                | 0.032658                    |
| Thermal correction to Enthalpy=              |                | 0.033602                    |
| Thermal correction to Gibbs Free Energy=     |                | 0.011527                    |
| Sum of electronic and zero-point Energies=   |                | -39.828856                  |
| Sum of electronic and thermal Energies=      |                | -39.825810                  |
| Sum of electronic and thermal Enthalpies=    |                | -39.824865                  |
| Sum of electronic and thermal Free Energies= |                | -39.846941                  |

Charge = 0 Multiplicity = 2

Symbolic Z-Matrix:

|   |          |          |          |
|---|----------|----------|----------|
| C | -2.28501 | -0.05192 | -0.21841 |
| H | -1.78062 | -0.94359 | 0.09047  |
| H | -1.7806  | 0.66141  | -0.83618 |
| H | -3.29382 | 0.12643  | 0.09047  |

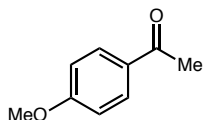

E(UB3LYP) = -499.601862578  
 Zero-point correction= 0.169901 (Hartree/Particle)  
 Thermal correction to Energy= 0.180335  
 Thermal correction to Enthalpy= 0.181280  
 Thermal correction to Gibbs Free Energy= 0.133599  
 Sum of electronic and zero-point Energies= -499.431962  
 Sum of electronic and thermal Energies= -499.421527  
 Sum of electronic and thermal Enthalpies= -499.420583  
 Sum of electronic and thermal Free Energies= -499.468264

Charge = 0 Multiplicity = 1

Symbolic Z-Matrix:

|   |          |          |          |
|---|----------|----------|----------|
| C | -0.36127 | 0.67459  | -0.52546 |
| C | 1.00707  | 0.90273  | -0.72429 |
| C | 1.59008  | 2.0972   | -0.28015 |
| C | 0.80476  | 3.06353  | 0.36281  |
| C | -0.56357 | 2.83539  | 0.56165  |
| C | -1.14659 | 1.64092  | 0.11751  |
| H | -0.80641 | -0.23741 | -0.86457 |
| H | 1.60667  | 0.16492  | -1.21521 |
| H | 1.2499   | 3.97554  | 0.70192  |
| H | -1.16318 | 3.5732   | 1.05257  |
| C | 3.09374  | 2.34791  | -0.49864 |
| O | -2.54285 | 1.40812  | 0.32041  |
| O | 3.61727  | 3.4205   | -0.09983 |
| C | 3.95673  | 1.28601  | -1.2052  |
| H | 4.95943  | 1.3375   | -0.83527 |
| H | 3.55474  | 0.31343  | -1.01185 |
| H | 3.95564  | 1.46929  | -2.25938 |
| C | -2.73968 | 0.75689  | 1.5782   |
| H | -3.78443 | 0.58269  | 1.73002  |
| H | -2.21813 | -0.17739 | 1.58159  |
| H | -2.36376 | 1.37807  | 2.36415  |

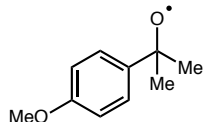

```

E(UB3LYP) = -539.455621335
Zero-point correction= 0.207915 (Hartree/Particle)
Thermal correction to Energy= 0.219941
Thermal correction to Enthalpy= 0.220885
Thermal correction to Gibbs Free Energy= 0.169299
Sum of electronic and zero-point Energies= -539.247706
Sum of electronic and thermal Energies= -539.235680
Sum of electronic and thermal Enthalpies= -539.234736
Sum of electronic and thermal Free Energies= -539.286322

```

Charge = 0 Multiplicity = 2

Symbolic Z-Matrix:

|   |          |          |          |
|---|----------|----------|----------|
| C | -1.17387 | -1.12313 | -0.30006 |
| C | 0.21331  | -1.00353 | -0.14079 |
| C | 0.8017   | 0.26533  | -0.05296 |
| C | 0.00292  | 1.41458  | -0.1244  |
| C | -1.38425 | 1.29497  | -0.28366 |
| C | -1.97264 | 0.02612  | -0.3715  |
| H | -1.62312 | -2.09193 | -0.36713 |
| H | 0.82319  | -1.881   | -0.08625 |
| H | 0.45218  | 2.38338  | -0.05733 |
| H | -1.99413 | 2.17245  | -0.3382  |
| O | -3.38813 | -0.09593 | -0.53401 |
| C | -4.01182 | -0.15891 | 0.75126  |
| H | -5.07096 | -0.25024 | 0.62966  |
| H | -3.63987 | -1.00716 | 1.28702  |
| H | -3.79131 | 0.73353  | 1.29882  |
| C | 2.32607  | 0.39677  | 0.12206  |
| O | 2.62076  | 1.58947  | 0.85385  |
| C | 2.8614   | -0.82407 | 0.89315  |
| H | 2.39472  | -0.87119 | 1.85486  |
| H | 2.64089  | -1.71651 | 0.34559  |
| H | 3.92054  | -0.73274 | 1.01476  |
| C | 2.99774  | 0.46459  | -1.26208 |
| H | 2.62579  | 1.31284  | -1.79784 |
| H | 4.05688  | 0.55592  | -1.14048 |
| H | 2.77723  | -0.42785 | -1.80964 |



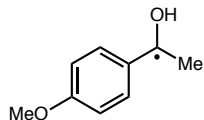

```

E(UB3LYP) = -500.162591296
Zero-point correction= 0.179385 (Hartree/Particle)
Thermal correction to Energy= 0.190718
Thermal correction to Enthalpy= 0.191662
Thermal correction to Gibbs Free Energy= 0.141000
Sum of electronic and zero-point Energies= -499.983207
Sum of electronic and thermal Energies= -499.971874
Sum of electronic and thermal Enthalpies= -499.970929
Sum of electronic and thermal Free Energies= -500.021591

```

Charge = 0 Multiplicity = 2

Symbolic Z-Matrix:

|   |          |          |          |
|---|----------|----------|----------|
| C | 1.14635  | 0.98634  | 0.00759  |
| C | -0.23458 | 1.10612  | 0.00812  |
| C | -1.08567 | -0.0285  | 0.01144  |
| C | -0.44135 | -1.30333 | 0.00665  |
| C | 0.93013  | -1.41671 | 0.00352  |
| C | 1.74655  | -0.27604 | 0.00483  |
| H | 1.74549  | 1.88464  | 0.01258  |
| H | -0.65753 | 2.10033  | 0.00915  |
| H | -1.04596 | -2.19764 | 0.00822  |
| H | 1.40189  | -2.39053 | 0.0043   |
| O | 3.09632  | -0.49664 | 0.01766  |
| C | 3.96503  | 0.631    | -0.02567 |
| H | 4.97612  | 0.23523  | -0.00963 |
| H | 3.81604  | 1.21138  | -0.93879 |
| H | 3.81853  | 1.27892  | 0.8409   |
| C | -2.49081 | 0.07894  | 0.00725  |
| O | -3.18979 | -1.10252 | -0.02588 |
| C | -3.30029 | 1.32664  | -0.00099 |
| H | -3.82301 | 1.45798  | -0.9551  |
| H | -4.06671 | 1.2958   | 0.78004  |
| H | -2.6946  | 2.21252  | 0.16966  |
| H | -4.13459 | -0.92216 | 0.00807  |

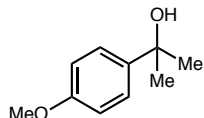

E(UB3LYP) = -540.127634724  
 Zero-point correction= 0.220538 (Hartree/Particle)  
 Thermal correction to Energy= 0.232848  
 Thermal correction to Enthalpy= 0.233792  
 Thermal correction to Gibbs Free Energy= 0.182508  
 Sum of electronic and zero-point Energies= -539.907096  
 Sum of electronic and thermal Energies= -539.894787  
 Sum of electronic and thermal Enthalpies= -539.893843  
 Sum of electronic and thermal Free Energies= -539.945126

Charge = 0 Multiplicity = 1

Symbolic Z-Matrix:

|   |          |          |          |
|---|----------|----------|----------|
| C | -1.17387 | -1.12313 | -0.30006 |
| C | 0.21331  | -1.00353 | -0.14079 |
| C | 0.8017   | 0.26533  | -0.05296 |
| C | 0.00292  | 1.41458  | -0.1244  |
| C | -1.38425 | 1.29497  | -0.28366 |
| C | -1.97264 | 0.02612  | -0.3715  |
| H | -1.62312 | -2.09193 | -0.36713 |
| H | 0.82319  | -1.881   | -0.08625 |
| H | 0.45218  | 2.38338  | -0.05733 |
| H | -1.99413 | 2.17245  | -0.3382  |
| O | -3.38813 | -0.09593 | -0.53401 |
| C | -4.01182 | -0.15891 | 0.75126  |
| H | -5.07096 | -0.25024 | 0.62966  |
| H | -3.63987 | -1.00716 | 1.28702  |
| H | -3.79131 | 0.73353  | 1.29882  |
| C | 2.32607  | 0.39677  | 0.12206  |
| O | 2.62076  | 1.58947  | 0.85385  |
| H | 3.57102  | 1.67141  | 0.96295  |
| C | 2.8614   | -0.82407 | 0.89315  |
| H | 2.39472  | -0.87119 | 1.85486  |
| H | 2.64089  | -1.71651 | 0.34559  |
| H | 3.92054  | -0.73274 | 1.01476  |
| C | 2.99774  | 0.46459  | -1.26208 |
| H | 2.62579  | 1.31284  | -1.79784 |
| H | 4.05688  | 0.55592  | -1.14048 |
| H | 2.77723  | -0.42785 | -1.80964 |

## References

- <sup>1</sup> Perrin, D. D.; Armarego, W. L. F. *Purification of Laboratory Chemicals*. 4<sup>th</sup> ed.; Butterworth-Heinemann: Oxford, 1997.
- <sup>2</sup> Pangborn, A. B.; Giardello, M. A.; Grubbs, R. H.; Rosen, R. K.; Timmers, F. J. *Organometallics*, **1996**, *15*, 1518–1520.
- <sup>3</sup> Rono, L. J.; Yayla, H. G.; Wang, D. Y.; Armstrong, M. F.; Knowles, R. R. *J. Am. Chem. Soc.*, **2013**, *135*, 17735–17738.
- <sup>4</sup> Canonne, P.; Bernatchez, M. *J. Org. Chem.* **1987**, *52*, 4025–4031.
- <sup>5</sup> Paramahamsan, H.; Pearson, A. J.; Pinkerton, A. A.; Zhurova, E. A. *Organometallics*, **2008**, *27*, 900–907.
- <sup>6</sup> Baraldi, P. G.; Barco, A.; Benetti, S.; Pollini, G. P.; Polo, E.; Simoni, D. *J. Org. Chem.* **1985**, *50*, 23–29.
- <sup>7</sup> Cheon, C. H.; Kanno, O.; Toste, F. D. *J. Am. Chem. Soc.* **2011**, *133*, 13248–13251.
- <sup>8</sup> Baciocchi, E.; Bietti, M.; Manduchi, L.; Steenken, S. *J. Am. Chem. Soc.* **1999**, *121*, 6624–6629.
- <sup>9</sup> In a few cases, the reaction was run on 0.5 mmol scale. Where it is the case, it will always be noted.
- <sup>10</sup> Du, B.; Yuan, C.; Zhang, L.; Yang, L.; Liu, B. *Tetrahedron Lett.* **2013**, *54*, 2217–2220.
- <sup>11</sup> Murata, R.; Hirano, K.; Uchiyama, M. *Chem. Asian J.* **2015**, *10*, 1286–1290.
- <sup>12</sup> Iranpoor, N.; Firouzabadi, H.; Khalili, D.; Motevalli, S. *J. Org. Chem.* **2008**, *73*, 4882–4887.
- <sup>13</sup> Wang, X.; Liu, M.; Xu, L.; Wang, Q.; Chen, J.; Ding, J.; Wu, H. *J. Org. Chem.* **2013**, *78*, 5273–5281.
- <sup>14</sup> Morandi, B.; Wickens, Z. K.; Grubbs, R. H. *Angew. Chem. Int. Ed.* **2013**, *52*, 2944–2948.
- <sup>15</sup> Morandi, B.; Wickens, Z. K.; Grubbs, R. H. *Angew. Chem. Int. Ed.* **2013**, *52*, 2944–2948.
- <sup>16</sup> Hayashi, M.; Shibuya, M.; Iwabuchi, Y. *J. Org. Chem.* **2012**, *77*, 3005–3009.
- <sup>17</sup> Yasu, Y.; Koike, T.; Akita, M. *Adv. Synth. Catal.* **2012**, *354*, 3414–3420.
- <sup>18</sup> Houmam, A. *Chem. Rev.* **2008**, *108*, 2180–2237.
- <sup>19</sup> Shaw, M. H.; Shurtleff, V. W.; Terret, J. A.; Cuthbertson, J. D.; MacMillan, D. W. C. *Science*, **2016**, *352*, 1304–1308.
- <sup>20</sup> Hanss, D.; Freys, J. C.; Bernardinelli, G.; Wenger, O. S. *Eur. J. Inorg. Chem.* **2009**, 4850–4859.
- <sup>21</sup> Brennan, J. L.; Keyes, T. E.; Forster, R. J. *Langmuir* **2006**, *22*, 10754–10761.
- <sup>22</sup> (a) Dossing, A.; Ryu, C. K.; Kudo, S.; Ford, P. C. *J. Am. Chem. Soc.* **1993**, *115*, 5132–5137. (b) Bruner, B.; Walker, M. B.; Ghimire, M. M.; Zhang, D.; Selke, M.; Klausmeyer, K. K.; Omary, M. A.; Farmer, P. J. *Dalton Trans.* **2014**, *43*, 11548–11556. (c) McClure, L. J.; Ford, P. C. *J. Phys. Chem.* **1992**, *96*, 6640–6650. (d) Schlenker, C. W.; Thompson, M. E. *Top. Curr. Chem.* **2012**, *312*, 175–212.
- <sup>23</sup> (a) Ye, C.; Li, M.; Luo, J.; Chen, L.; Tang, Z.; Pei, J.; Jiang, L.; Song, Y.; Zhu, D. *J. Mater. Chem.* **2012**, *22*, 4299–4305. (b) Singh, A.; Teegardin, K.; Kelly, M.; Prasad, K. S.; Krishnan, S.; Weaver, J. D. *J. Organomet. Chem.* **2015**, *776*, 51–59.
- <sup>24</sup> Parr, R. G.; Yang, W. *Density-Functional Theory of Atoms and Molecules*. University Press: Oxford, 1989.

↔

- <sup>25</sup> Gaussian 09, Revision C.01, Frisch, M. J.; Trucks, G. W.; Schlegel, H. B.; Scuseria, G. E.; Robb, M. A.; Cheeseman, J. R.; Scalmani, G.; Barone, V.; Mennucci, B.; Petersson, G. A.; Nakatsuji, H.; Caricato, M.; Li, X.; Hratchian, H. P.; Izmaylov, A. F.; Bloino, J.; Zheng, G.; Sonnenberg, J. L.; Hada, M.; Ehara, M.; Toyota, K.; Fukuda, R.; Hasegawa, J.; Ishida, M.; Nakajima, T.; Honda, Y.; Kitao, O.; Nakai, H.; Vreven, T.; Montgomery, J. A., Jr.; Peralta, J. E.; Ogliaro, F.; Bearpark, M.; Heyd, J. J.; Brothers, E.; Kudin, K. N.; Staroverov, V. N.; Kobayashi, R.; Normand, J.; Raghavachari, K.; Rendell, A.; Burant, J. C.; Iyengar, S. S.; Tomasi, J.; Cossi, M.; Rega, N.; Millam, J. M.; Klene, M.; Knox, J. E.; Cross, J. B.; Bakken, V.; Adamo, C.; Jaramillo, J.; Gomperts, R.; Stratmann, R. E.; Yazyev, O.; Austin, A. J.; Cammi, R.; Pomelli, C.; Ochterski, J. W.; Martin, R. L.; Morokuma, K.; Zakrzewski, V. G.; Voth, G. A.; Salvador, P.; Dannenberg, J. J.; Dapprich, S.; Daniels, A. D.; Farkas, Ö.; Foresman, J. B.; Ortiz, J. V.; Cioslowski, J.; Fox, D. J. Gaussian, Inc., Wallingford CT, 2010.
- <sup>26</sup> (a) Parr, R. G.; Yang, W. *Annu. Rev. Phys. Chem.* **1995**, *46*, 701–728. (b) Stephens, P. J.; Devlin, F. J.; Chabalowski, C. F.; Frisch, M. J. *J. Phys. Chem.* **1994**, *98*, 11623–11627. (c) Lee, C.; Yang, W.; Parr, R. G. *Phys. Rev. B* **1988**, *37*, 785–789. (d) Becke, A. D. *Phys. Rev. A* **1988**, *38*, 3098–3100. (e) Becke, A. D. *J. Chem. Phys.* **1993**, *98*, 5648–5652.
- <sup>27</sup> (a) McLean, A. D.; Chandler, G. S. *J. Chem. Phys.* **1980**, *72*, 5639–5648. (b) Raghavachari, K.; Binkley, J. S.; Seeger, R.; Pople, J. A. *J. Chem. Phys.* **1980**, *72*, 650–654. (c) Blaudeau, J.-P.; McGrath, M. P.; Curtiss, L. A.; Radom, L. *J. Chem. Phys.* **1997**, *107*, 5016–5021. (d) Wachters, A. J. H. *J. Chem. Phys.* **1970**, *52*, 1033. (e) Hay, P. J. *J. Chem. Phys.* **1977**, *66*, 4377–4384. (f) Raghavachari, K.; Trucks, G. W. *J. Chem. Phys.* **1989**, *91*, 1062–1065. (g) Binning Jr., R. C.; Curtiss, L. A. *J. Comput. Chem.* **1990**, *11*, 1206–1216. (h) McGrath, M. P.; Radom, L. *J. Chem. Phys.* **1991**, *94*, 511–516. (i) Curtiss, L. A.; McGrath, M. P.; Blaudeau, J.-P.; Davis, N. E.; Binning Jr., R. C.; Radom, L. *J. Chem. Phys.* **1995**, *103*, 6104–6113. (j) Clark, T.; Chandrasekhar, J.; Spitznagel, G. W.; Schleyer, P. v. R. *J. Comput. Chem.* **1983**, *4*, 294–301. (k) Frisch, M. J.; Pople, J. A.; Binkley, J. S. *J. Chem. Phys.* **1984**, *80*, 3265–3269.
- <sup>28</sup> (a) Barone, V.; Cossi, M. *J. Phys. Chem. A.*, **1998**, *102*, 1995–2001. (b) Cossi, M.; Rega, N.; Scalmani, G.; Barone, V. *J. Comput. Chem.*, **2003**, *24*, 669–681.
- <sup>29</sup> Luo, Y.-R. *Comprehensive Handbook of Chemical Bond Energies*; CRC Press: Boca Raton, FL, 2007, p 258.
- <sup>30</sup> Luo, Y.-R. *Comprehensive Handbook of Chemical Bond Energies*; CRC Press: Boca Raton, FL, 2007, p 147.
